# Supplementary material for: Synthesis of phosphine oxide based amphiphilic molecules via ring-opening Wittig olefination of a macrocyclic phosphoranylidene and their property study as non-ionic surfactants
Source: Royal Society of Chemistry journal article supplement (doi:10.1039/c8ra03324b), 2018-01-01

## Supplementary material

### Synthesis of Phosphine Oxide Based Amphiphilic Molecules via Ring-opening Wittig Olefination of A Macrocyclic Phosphoranylidene and Their Property Study as Non-ionic Surfactants

Jin Xu<sup>a,\*</sup>, Anqi Chen<sup>a</sup>, Brendan Burkett<sup>a</sup>, Qi Hua Ng<sup>b</sup>, Kok Ping Chan<sup>a,\*</sup>

<sup>a</sup> *Organic Chemistry, Institute of Chemical and Engineering Sciences (ICES), A\*STAR, 8 Biomedical Grove, Neuros #07-01, 138665, Singapore*

<sup>b</sup> *Polymer Engineering & Characterisation, Institute of Chemical and Engineering Sciences (ICES), A\*STAR, 1 Pesek Road, Jurong Island, 627833, Singapore*

\* Corresponding authors

Fax: (65) 6464 2102. Email: [xu\\_jin@ices.a-star.edu.sg](mailto:xu_jin@ices.a-star.edu.sg); [chankp75@hotmail.com](mailto:chankp75@hotmail.com)

## Table of Content

### 1. Experimental section

|      |                                                               |   |
|------|---------------------------------------------------------------|---|
| 1.1. | General experimental method for chemistry and materials ..... | 1 |
| 1.2. | Syntheses of compounds .....                                  | 1 |
| 1.3. | Physicochemical characterizations.....                        | 6 |

|    |                                                      |   |
|----|------------------------------------------------------|---|
| 2. | <sup>1</sup> H and <sup>13</sup> C NMR spectra ..... | 7 |
|----|------------------------------------------------------|---|

## 1. Experimental section

### 1.1. General experimental method for chemistry and materials

$^1\text{H}/^{13}\text{C}/^{31}\text{P}$  NMR spectra were recorded at 400/100/162 MHz respectively on a Bruker 400 UltraShield spectrometer and the chemical shifts are reported in units parts per million (ppm). All the proton and carbon spectra were referenced to the respective residual solvent peaks. High resolution mass spectra were obtained using the Agilent 6210 time-of-flight LC/MS. Flash silica gel column chromatography purification was carried out either by a Biotage SP1 purification system or manual glass column using Silica gel 60.

Bromoacetyl bromide (97%), tetraethylene glycol (99%), 1,4-diphenylphosphinobenzoic acid (97%), benzotriazol-1-yl-oxypyrrolidinophosphonium hexafluorophosphate (PyBop) (98%) and the aldehydes were purchased from Sigma-Aldrich. Cesium carbonate (99%) was from Alfa Aesar. Polyoxyethylene (10) monostearate (**11**, see structure below) was from Tee Hai (TCI P0719).

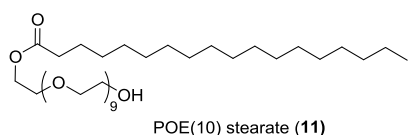

### 1.2. Syntheses of compounds

(*E*)-9-((3-(3-chlorophenyl)acryloyl)oxy)nonyl 4-(diphenylphosphoryl)benzoate (**5**)

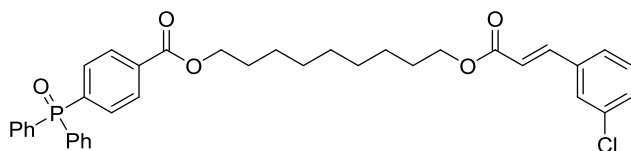

To a solution of 9-bromononyl 2-bromoacetate (**1b**) (480 mg, 1.4 mmol) in anhydrous toluene (10 mL) was added 1,4-diphenylphosphinobenzoic acid (**2**) (427 mg, 1.4 mmol). The flask was fitted with a condenser and the mixture was stirred at 80 °C under argon for 18 hours. After being cooled down, toluene was removed by under reduced pressure. The crude product was purified by silica gel column chromatography using 0 – 10% methanol in dichloromethane to afford phosphonium salt **3b** (564 mg, 62%) as a white solid. To compound **3b** (210 mg, 0.32 mmol) in DMF (10 mL) was added *t*-BuOK (124 mg, 0.96 mmol) and the mixture was stirred at 80 °C in a sealed tube under argon for 18 hours, then cooled down, followed by addition of 3-chlorobenzaldehyde (77 mg, 0.48 mmol) via syringe, the mixture was further stirred at room temperature for 20 h. DMF was removed by under reduced pressure. The crude product was purified by silica gel column chromatography using 0 – 50% EtOAc in petroleum ether to afford pure product **5** (26 mg, 13% in 2 steps) as colorless gum.

$^1\text{H}$  NMR (400 MHz,  $\text{CDCl}_3$ )  $\delta$  8.11 (dd,  $J = 8.3, 2.4$  Hz, 2H), 7.76 (dd,  $J = 11.5, 8.5$  Hz, 2H), 7.70 – 7.61 (m, 4H), 7.60 – 7.53 (m, 2H), 7.53 – 7.44 (m, 5H), 7.41 – 7.28 (m, 4H), 6.43 (d,  $J = 16.0$  Hz, 1H), 4.33 (t,  $J = 6.7$  Hz, 2H), 4.20 (t,  $J = 6.7$  Hz, 2H), 1.81 – 1.65 (m, 4H), 1.48 – 1.29 (m, 10H).  $^{13}\text{C}$  NMR (100 MHz,  $\text{CDCl}_3$ )  $\delta$  166.6, 165.8, 142.9, 137.6 (d,  $J = 100.9$  Hz), 136.3, 134.9, 133.6 (d,  $J = 3.0$  Hz, 2C), 132.0 (d,  $J = 105.4$  Hz, 2C), 132.5 - 132.0 (6C), 130.1 (d,  $J = 4.3$  Hz, 2C), 129.3 (d,  $J = 12.1$  Hz, 2C), 128.6 (d,  $J = 12.2$  Hz, 4C), 127.8, 126.2, 119.8, 65.5, 64.8, 29.4, 29.2 (2C), 28.7 (2C), 26.0, 25.9.  $^{31}\text{P}$  NMR (162 MHz,  $\text{CDCl}_3$ )  $\delta$  28.42. ESI-MS:  $m/z$  630  $[\text{M}+\text{H}]^+$ .

#### 2-{2-[2-(2-Hydroxyethoxy)ethoxy]ethoxy}ethyl 2-bromoacetate (**6**)

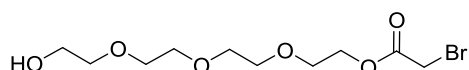

To a solution of tetraethylene glycol (1.94 g, 10 mmol) in dichloromethane (70 mL) was added anhydrous trimethylamine (1.55 mL, 11 mmol). The mixture was stirred at 0 °C for 20 minutes followed by slow addition of bromoacetyl bromide (870  $\mu\text{L}$ , 10 mmol) over 1 hour *via* a syringe pump at 0 °C. The mixture was stirred for further 2 hours at room temperature. Dichloromethane was then removed under reduced pressure and the crude product was purified by silica gel column chromatography using 0 – 5% methanol in dichloromethane to afford compound **6** (1.53 g, 49%) as a colorless oil.  $^1\text{H}$  NMR (400 MHz,  $\text{CDCl}_3$ )  $\delta$  4.35 – 4.31 (m, 2H), 3.87 (s, 2H), 3.76 – 3.58 (m, 14H).  $^{13}\text{C}$  NMR (100 MHz,  $\text{CDCl}_3$ )  $\delta$  167.2, 72.5, 70.6, 70.6, 70.5, 70.3, 68.8, 65.2, 61.7, 25.8. HRMS (ESI-TOF)  $m/z$  for  $\text{C}_{10}\text{H}_{20}\text{BrO}_6$   $[\text{M}+\text{H}]^+$ : 315.0438 ( $^{79}\text{Br}$ ) and 317.0419 ( $^{81}\text{Br}$ ), found 315.0429 and 317.0411 respectively.

#### 4-Carboxyphenyl(14-hydroxy-2-oxo-3,6,9,12-tetraoxatetradecyl)diphenylphosphonium bromide (**7**)

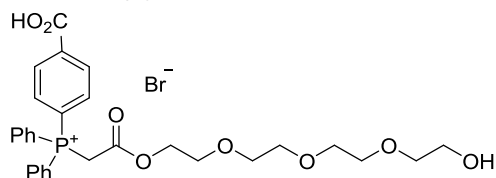

To a solution of **6** (3.78 g, 12 mmol) in anhydrous toluene (60 mL) was added 1,4-diphenylphosphinobenzoic acid (3.67 g, 12 mmol). The flask was fitted with a condenser and the mixture was stirred at 80 °C under argon for 8 hours. After being cooled down, toluene was removed by under reduced pressure. The crude product was purified by silica gel column chromatography using 0 – 15% methanol in dichloromethane to afford compound **7** (4.68 g, 49%) as a white amorphous solid after drying under vacuum.  $^1\text{H}$  NMR (400 MHz,  $\text{CDCl}_3$ )  $\delta$  8.23 (dd,  $J = 8.4, 3.3$  Hz, 2H), 7.86 – 7.61 (m, 12H), 4.18 – 4.10 (m, 2H), 3.63 – 3.44 (m, 14H), 3.32 (s, 2H).  $^{13}\text{C}$  NMR (100 MHz,  $\text{CDCl}_3$ )  $\delta$  166.5, 164.2, 164.1, 137.6, 137.6, 135.6, 135.5, 133.9, 133.8, 133.7, 131.0, 130.9, 130.5, 130.4, 122.3, 121.4, 117.5, 116.6, 72.4, 70.4, 70.2, 70.0, 68.1, 65.7, 61.1, 49.8.  $^{31}\text{P}$  NMR (162 MHz,  $\text{CDCl}_3$ )  $\delta$  20.28. HRMS (ESI-TOF)  $m/z$  for  $\text{C}_{29}\text{H}_{34}\text{O}_8\text{P}^+$   $[\text{M}]^+$ : 541.1991, found 541.2002.

#### Synthesis of **9 (a-h)** *via* macrocyclization and Wittig olefination

The mixture of compound **7** (1.24 g, 2 mmol), PyBop (2.08 g, 4 mmol), Cs<sub>2</sub>CO<sub>3</sub> (1.95 g, 6 mmol) in anhydrous dimethylformamide (150 mL) was degassed with argon and stirred at room temperature for 4 hours under an argon balloon, after which nonanal (569 mg, 4 mmol) was added. The mixture was stirred at 40 °C for 16 hours. The reaction was quenched by addition of saturated aqueous NH<sub>4</sub>Cl solution, DMF and water was then removed under high vacuum. The crude mixture was re-dissolved in dichloromethane and water, extracted with dichloromethane (100 mL x 3), washed with brine, dried over anhydrous Na<sub>2</sub>SO<sub>4</sub> and concentrated to give a crude product which was purified by silica gel column chromatography using 0 – 100% ethyl acetate in petroleum ether to afford compound **9a** (833 mg, 63%) as a colorless viscous gum.

(*E*)-13-oxo-3,6,9,12-tetraoxatricos-14-en-1-yl 4-(diphenylphosphoryl)benzoate (**9a**)

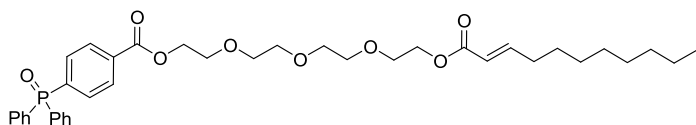

<sup>1</sup>H NMR (400 MHz, CDCl<sub>3</sub>) δ 8.13 (dd, *J* = 8.3, 2.5 Hz, 2H), 7.76 (dd, *J* = 11.5, 8.3 Hz, 2H), 7.69 – 7.62 (m, 4H), 7.60 – 7.53 (m, 2H), 7.51 – 7.44 (m, 4H), 6.97 (dt, *J* = 16.2, 6.7 Hz, 1H), 5.83 (dt, *J* = 15.8, 1.4 Hz, 1H), 4.51 – 4.47 (m, 2H), 4.28 – 4.23 (m, 2H), 3.85 – 3.80 (m, 2H), 3.73 – 3.61 (m, 10H), 2.22 – 2.14 (m, 2H), 1.48 – 1.39 (m, 2H), 1.35 – 1.20 (m, 10H), 0.87 (t, *J* = 6.8 Hz, 3H). <sup>13</sup>C NMR (100 MHz, CDCl<sub>3</sub>) δ 166.6, 165.7, 150.1, 138.2, 137.2, 133.2, 133.2, 132.3, 132.3, 132.2, 132.2, 132.1, 132.0, 131.3, 129.6, 129.4, 128.7, 128.6, 120.9, 70.7, 70.7, 70.6, 70.6, 69.2, 69.1, 64.5, 63.3, 32.2, 31.8, 29.3, 29.1, 29.1, 28.0, 22.6, 14.0. <sup>31</sup>P NMR (162 MHz, CDCl<sub>3</sub>) δ 28.38. HRMS (ESI-TOF) *m/z* for C<sub>38</sub>H<sub>50</sub>O<sub>8</sub>P [M+H]<sup>+</sup>: 665.3238, found 665.3267.

Other Wittig products **9 (b to g)** were prepared similarly from the corresponding aldehydes respectively using above procedure.

(*E*)-13-oxo-17-phenyl-3,6,9,12-tetraoxaheptadec-14-en-1-yl 4-(diphenylphosphoryl)benzoate (**9b**)

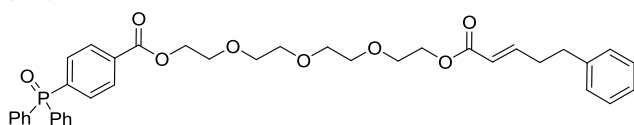

Colorless viscous gum (74% yield). <sup>1</sup>H NMR (400 MHz, MeOD) δ 8.18 (dd, *J* = 8.6, 2.7 Hz, 2H), 7.77 (dd, *J* = 11.7, 8.6 Hz, 2H), 7.61 (d, *J* = 1.7 Hz, 10H), 7.28 – 7.11 (m, 5H), 6.97 (dd, *J* = 15.6, 6.9 Hz, 1H), 5.81 (dt, *J* = 15.6, 1.6 Hz, 1H), 4.51 – 4.47 (m, 2H), 4.21 – 4.16 (m, 2H), 3.85 – 3.81 (m, 2H), 3.70 – 3.54 (m, 10H), 2.74 (t, *J* = 7.6 Hz, 2H), 2.54 – 2.46 (m, 2H). <sup>13</sup>C NMR (101 MHz, MeOD) δ 168.0, 166.9, 150.3, 142.1, 138.0 (d, *J* = 102.3 Hz), 135.1 (d, *J* = 2.7 Hz), 134.0 (d, *J* = 2.7 Hz, 2C), 133.3 (d, *J* = 10.3 Hz, 2C), 133.1 (d, *J* = 10.2 Hz, 4C), 132.1 (d, *J* = 106.1 Hz, 2C), 130.7 (d, *J* = 12.3 Hz, 2C), 130.1 (d, *J* = 12.4 Hz, 4C), 129.4 (4C), 127.1, 122.4, 71.7, 71.6 (3C), 70.1 (2C), 65.8, 64.6, 35.3, 34.9. <sup>31</sup>P NMR (162 MHz, MeOD) δ 31.25. HRMS (ESI-TOF) *m/z* for C<sub>38</sub>H<sub>41</sub>NaO<sub>8</sub>P [M+Na]<sup>+</sup>: 679.2431, found 679.2439.

(*E*)-13-oxo-3,6,9,12-tetraoxaicos-14-en-1-yl 4-(diphenylphosphoryl)benzoate (**9c**)

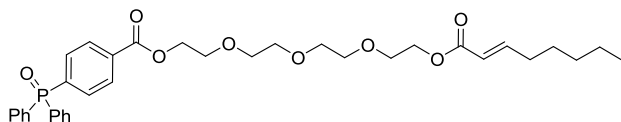

Colorless viscous gum (71% yield).  $^1\text{H}$  NMR (400 MHz, Methanol- $d_4$ )  $\delta$  8.19 (dd,  $J = 8.5, 2.6$  Hz, 2H), 7.79 (dd,  $J = 11.7, 8.5$  Hz, 2H), 7.71 – 7.54 (m, 10H), 6.96 (dt,  $J = 15.6, 7.0$  Hz, 0H), 5.81 (dt,  $J = 15.6, 1.5$  Hz, 1H), 4.51 – 4.47 (m, 2H), 4.20 (dd,  $J = 5.5, 4.1$  Hz, 2H), 3.87 – 3.81 (m, 2H), 3.71 – 3.56 (m, 10H), 2.18 (qd,  $J = 7.4, 1.5$  Hz, 1H), 1.44 (p,  $J = 7.3$  Hz, 2H), 1.37 – 1.24 (m, 4H), 0.89 (t,  $J = 6.9$  Hz, 3H).  $^{13}\text{C}$  NMR (101 MHz, Methanol- $D_4$ )  $\delta$  168.1, 166.9, 151.5, 138.0 (d,  $J = 102.2$  Hz), 135.1 (d,  $J = 2.8$  Hz), 134.0 (d,  $J = 2.8$  Hz, 2C), 133.3 (d,  $J = 10.4$  Hz, 2C), 133.1 (d,  $J = 10.2$  Hz, 4C), 132.1 (d,  $J = 106.1$  Hz, 2C), 130.7 (d,  $J = 12.3$  Hz, 2C), 130.1 (d,  $J = 12.4$  Hz, 4C), 121.9, 71.6, 71.5 (3C), 70.1, 70.1, 65.8, 64.5, 33.1, 32.4, 28.8, 23.4, 14.3.  $^{31}\text{P}$  NMR (162 MHz, MeOD)  $\delta$  31.25. HRMS (ESI-TOF)  $m/z$  for  $\text{C}_{35}\text{H}_{43}\text{NaO}_8\text{P}$   $[\text{M}+\text{Na}]^+$ : 645.2588, found 645.2593.

(*E*)-16-methyl-13-oxo-3,6,9,12-tetraoxanonadec-14-en-1-yl 4-(diphenylphosphoryl)benzoate (**9d**)

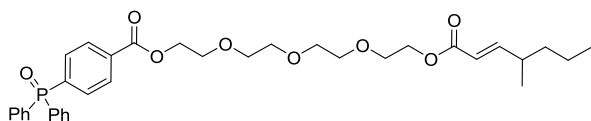

Colorless viscous gum (48% yield).  $^1\text{H}$  NMR (400 MHz, MeOD)  $\delta$  8.19 (dd,  $J = 8.6, 2.7$  Hz, 2H), 7.79 (dd,  $J = 11.7, 8.6$  Hz, 2H), 7.71 – 7.53 (m, 10H), 6.84 (dd,  $J = 15.7, 8.1$  Hz, 1H), 5.78 (dd,  $J = 15.7, 1.1$  Hz, 1H), 4.51 – 4.47 (m, 2H), 4.23 – 4.18 (m, 2H), 3.86 – 3.82 (m, 2H), 3.70 – 3.56 (m, 10H), 2.37 – 2.25 (m, 1H), 1.39 – 1.23 (m, 4H), 1.02 (d,  $J = 6.7$  Hz, 3H), 0.88 (t,  $J = 7.1$  Hz, 3H).  $^{13}\text{C}$  NMR (100 MHz, MeOD)  $\delta$  168.3, 166.9, 156.6, 138.02 (d,  $J = 102.3$  Hz), 135.08 (d,  $J = 2.8$  Hz), 134.02 (d,  $J = 2.9$  Hz, 2C), 133.29 (d,  $J = 10.3$  Hz, 2C), 133.07 (d,  $J = 10.2$  Hz, 4C), 132.12 (d,  $J = 106.1$  Hz, 2C), 130.75 (d,  $J = 12.3$  Hz, 2C), 130.12 (d,  $J = 12.4$  Hz, 4C), 120.3, 71.7, 71.5, 70.2, 70.1, 65.8, 64.6, 39.3, 37.5, 21.4, 19.7, 14.3.  $^{31}\text{P}$  NMR (162 MHz, MeOD)  $\delta$  31.25. HRMS (ESI-TOF)  $m/z$  for  $\text{C}_{35}\text{H}_{43}\text{NaO}_8\text{P}$   $[\text{M}+\text{Na}]^+$ : 645.2588, found 645.2601.

(*E*)-13-oxo-3,6,9,12-tetraoxahexacos-14-en-1-yl 4-(diphenylphosphoryl)benzoate (**9e**)

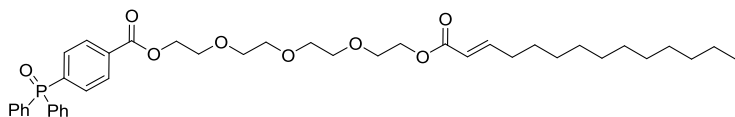

Colorless viscous gum (63% yield).  $^1\text{H}$  NMR (400 MHz,  $\text{CDCl}_3$ )  $\delta$  8.13 (dd,  $J = 8.3, 2.4$  Hz, 2H), 7.77 (dd,  $J = 11.5, 8.3$  Hz, 2H), 7.70 – 7.61 (m, 4H), 7.60 – 7.53 (m, 2H), 7.53 – 7.44 (m, 4H), 6.98 (dt,  $J = 15.6, 6.9$  Hz, 1H), 5.83 (d,  $J = 15.6$  Hz, 1H), 4.54 – 4.47 (m, 2H), 4.29 – 4.22 (m, 2H), 3.86 – 3.80 (m, 2H), 3.74 – 3.60 (m, 10H), 2.18 (ddd,  $J = 14.8, 7.2, 1.6$  Hz, 1H), 1.48 – 1.38 (m, 2H), 1.33 – 1.21 (m, 18H), 0.88 (t,  $J = 6.8$  Hz, 3H).  $^{13}\text{C}$  NMR (100 MHz,  $\text{CDCl}_3$ )  $\delta$  13C NMR (101 MHz,  $\text{CDCl}_3$ )  $\delta$  166.6, 165.7, 150.1, 138.2, 137.2, 133.2 (2C), 132.4, 132.2 (2C), 132.1, 132.0, 131.3, 129.6, 129.4, 128.7, 128.6, 120.9, 70.7, 70.6, 69.3, 69.1, 64.5, 63.3, 32.2, 31.9, 29.6, 29.5, 29.4, 29.3, 29.1, 28.0, 22.7, 14.1.  $^{31}\text{P}$  NMR (162

MHz, CDCl<sub>3</sub>)  $\delta$  28.33. HRMS (ESI-TOF)  $m/z$  for C<sub>41</sub>H<sub>56</sub>O<sub>8</sub>P [M+H]<sup>+</sup>: 707.3707, found 707.3726.

(*E*)-17,21-dimethyl-13-oxo-3,6,9,12-tetraoxadocosa-14,20-dien-1-yl  
(diphenylphosphoryl)benzoate (**9f**)

4-

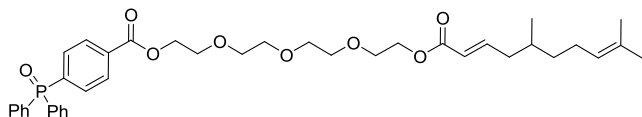

Colorless viscous gum (61% yield). <sup>1</sup>H NMR (400 MHz, MeOD)  $\delta$  8.19 (dd,  $J$  = 8.5, 2.6 Hz, 1H), 7.79 (dd,  $J$  = 11.7, 8.5 Hz, 1H), 7.66 (ddd,  $J$  = 7.5, 6.0, 4.3 Hz, 6H), 7.58 (dd,  $J$  = 6.7, 2.8 Hz, 4H), 6.93 (dt,  $J$  = 15.3, 7.5 Hz, 1H), 5.82 (dt,  $J$  = 15.3, 1.4 Hz, 1H), 5.08 (br t,  $J$  = 7.3 Hz, 1H), 4.53 – 4.45 (m, 2H), 4.24 – 4.17 (m, 2H), 3.87 – 3.82 (m, 2H), 3.71 – 3.56 (m, 10H), 2.26 – 2.17 (m, 1H), 2.10 – 1.90 (m, 3H), 1.66 (s, 3H), 1.59 (s, 3H), 1.39 – 1.11 (m, 3H), 0.89 (d,  $J$  = 6.9 Hz, 3H). <sup>13</sup>C NMR (100 MHz, MeOD)  $\delta$  168.0, 166.8, 150.2, 138.5, 137.5, 135.1, 134.0, 134.0, 133.3, 133.2, 133.1, 133.0, 132.7, 132.3, 131.6, 130.8, 130.7, 130.2, 130.1, 125.5, 123.1, 71.7, 71.6, 71.6, 71.6, 70.2, 70.1, 65.8, 64.6, 40.5, 37.8, 33.3, 26.5, 25.9, 19.9, 17.7. <sup>31</sup>P NMR (162 MHz, CDCl<sub>3</sub>)  $\delta$  28.31. HRMS (ESI-TOF)  $m/z$  for C<sub>39</sub>H<sub>50</sub>O<sub>8</sub>P [M+H]<sup>+</sup>: 677.3238, found 677.3252.

(*E*)-15-(4-cyanophenyl)-13-oxo-3,6,9,12-tetraoxapentadec-14-en-1-yl  
(diphenylphosphoryl)benzoate  
(**9g**)

4-

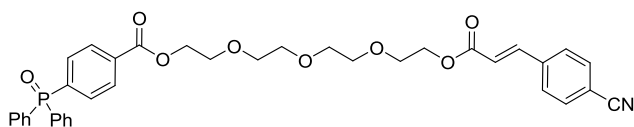

Colorless viscous gum (64% yield). <sup>1</sup>H NMR (400 MHz, MeOD)  $\delta$  8.17 (dd,  $J$  = 8.3, 2.4 Hz, 2H), 7.82 – 7.53 (m, 17H), 6.65 (d,  $J$  = 16.1 Hz, 1H), 4.50 – 4.45 (m, 2H), 4.32 – 4.27 (m, 2H), 3.85 – 3.80 (m, 2H), 3.75 – 3.58 (m, 10H). <sup>13</sup>C NMR (100 MHz, MeOD)  $\delta$  167.6, 166.9, 143.9, 140.2, 138.8 (d,  $J$  = 103.0 Hz), 135.1 (d,  $J$  = 2.7 Hz), 134.0 (d,  $J$  = 2.7 Hz, 2C), 133.8 (2C), 133.3 (d,  $J$  = 10.4 Hz, 2C), 133.1 (d,  $J$  = 10.2 Hz, 4C), 132.1 (d,  $J$  = 106.1 Hz, 2C), 130.7 (d,  $J$  = 12.2 Hz, 2C), 130.1 (d,  $J$  = 12.4 Hz, 4C), 129.9 (2C), 122.6, 119.3, 114.4, 71.6 (4C), 70.1 (2C), 65.8, 65.0. <sup>31</sup>P NMR (162 MHz, MeOD)  $\delta$  31.23. HRMS (ESI-TOF)  $m/z$  for C<sub>37</sub>H<sub>36</sub>NaNO<sub>8</sub>P [M+Na]<sup>+</sup>: 676.2071, found 676.2079.

(*E*)-15-(4-methoxyphenyl)-13-oxo-3,6,9,12-tetraoxapentadec-14-en-1-yl  
(diphenylphosphoryl)benzoate  
(**9h**)

4-

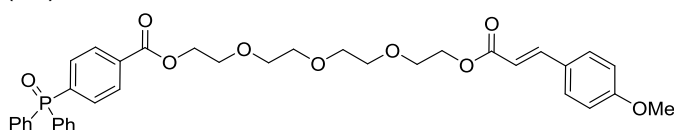

Colorless viscous gum (72% yield).  $^1\text{H}$  NMR (400 MHz, MeOD)  $\delta$  8.17 (dd,  $J = 8.5, 2.4$  Hz, 1H), 7.77 (dd,  $J = 11.7, 8.5$  Hz, 2H), 7.70 – 7.48 (m, 13H), 6.92 (d,  $J = 8.8$  Hz, 2H), 6.34 (d,  $J = 16.0$  Hz, 1H), 4.49 – 4.45 (m, 2H), 4.29 – 4.25 (m, 2H), 3.84 – 3.78 (m, 2H), 3.80 (s, 3H), 3.73 – 3.58 (m, 10H).  $^{13}\text{C}$  NMR (100 MHz, MeOD)  $\delta$  168.9, 166.9, 163.2, 146.3, 138.0 (d,  $J = 102.3$  Hz), 135.1 (d,  $J = 2.8$  Hz), 134.0 (d,  $J = 2.8$  Hz, 2C), 133.2 (d,  $J = 10.3$  Hz, 2C), 133.1 (d,  $J = 10.2$  Hz, 4C), 132.1 (d,  $J = 106.1$  Hz, 2C), 131.0 (2C), 130.7 (d,  $J = 12.3$  Hz, 2C), 130.1 (d,  $J = 12.4$  Hz, 4C), 128.2, 116.0, 115.4 (2C), 71.7, 71.6 (3C), 70.2, 70.1, 65.8, 64.6, 55.9.  $^{31}\text{P}$  NMR (162 MHz, MeOD)  $\delta$  31.27. HRMS (ESI-TOF)  $m/z$  for  $\text{C}_{37}\text{H}_{39}\text{NaO}_9\text{P}$   $[\text{M}+\text{Na}]^+$ : 681.2224, found 681.2236.

### 1.3. Physicochemical characterizations

#### 1.3.1. Determination of critical micelle concentration (CMC), surface tension at CMC ( $\gamma_{\text{CMC}}$ ) and other physicochemical properties by surface tension

The surface tensions of surfactants were measured using Dataphysics<sup>TM</sup> contact angle system OCA by a pendant drop method. A drop of surfactant solution of known concentration was suspended by a needle and the image was captured by a camera, from where surface tension was calculated. The sample solution was prepared as a stock solution using DI water and then diluted to the desired concentration for each measurement. The CMC values were determined by plotting the curve of surface tension versus the logarithm of the concentration of the aqueous surfactant solution. The CMC value is defined as the concentration at the intersection point of the two derived trendlines where there is a sharp change of surface tension. The surface tension at concentration of CMC is denoted as  $\gamma_{\text{CMC}}$ .

#### 1.3.2. Interfacial tension

Interfacial tension (IFT) was measured by Spinning drop tensiometer SVT 20N from Dataphysics<sup>TM</sup>. Sample tube was filled with the denser fluid (aqueous surfactant solution or pure water in ca 10 mL). A small drop of less dense fluid (pure oil phase or oil dispersion of surfactant) was then injected into the sample tube. For the IFT of surfactant/water/*n*-decane system, the surfactant was dissolved in water whilst for that of surfactant/water/paraffin oil system, the surfactant was dissolved in paraffin oil. Sample tube was then rotated along an axis at required speed. IFT was determined by the shape of the oil drop which has been elongated by the spinning force applied on the sample tube.

#### 1.3.3. Microscopic analysis of emulsion droplets

The emulsion samples for microscopic analysis were freshly prepared either using an Microson<sup>TM</sup> Ultrasonic homogenizer. The mixture of 0.1wt% of surfactant and rhodamine dye in water and *n*-decane (1:1) was sonicated for 5 minutes and the resulting emulsions prepared were visualized and analyzed with Trinocular biological microscope TM-Advance 5.0 MP. The images were recorded with ToupView X86 at 40x magnification.

Compound **6**,  $^1\text{H}$ NMR in  $\text{CDCl}_3$

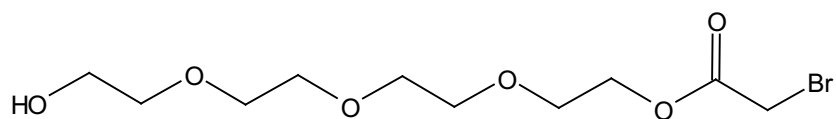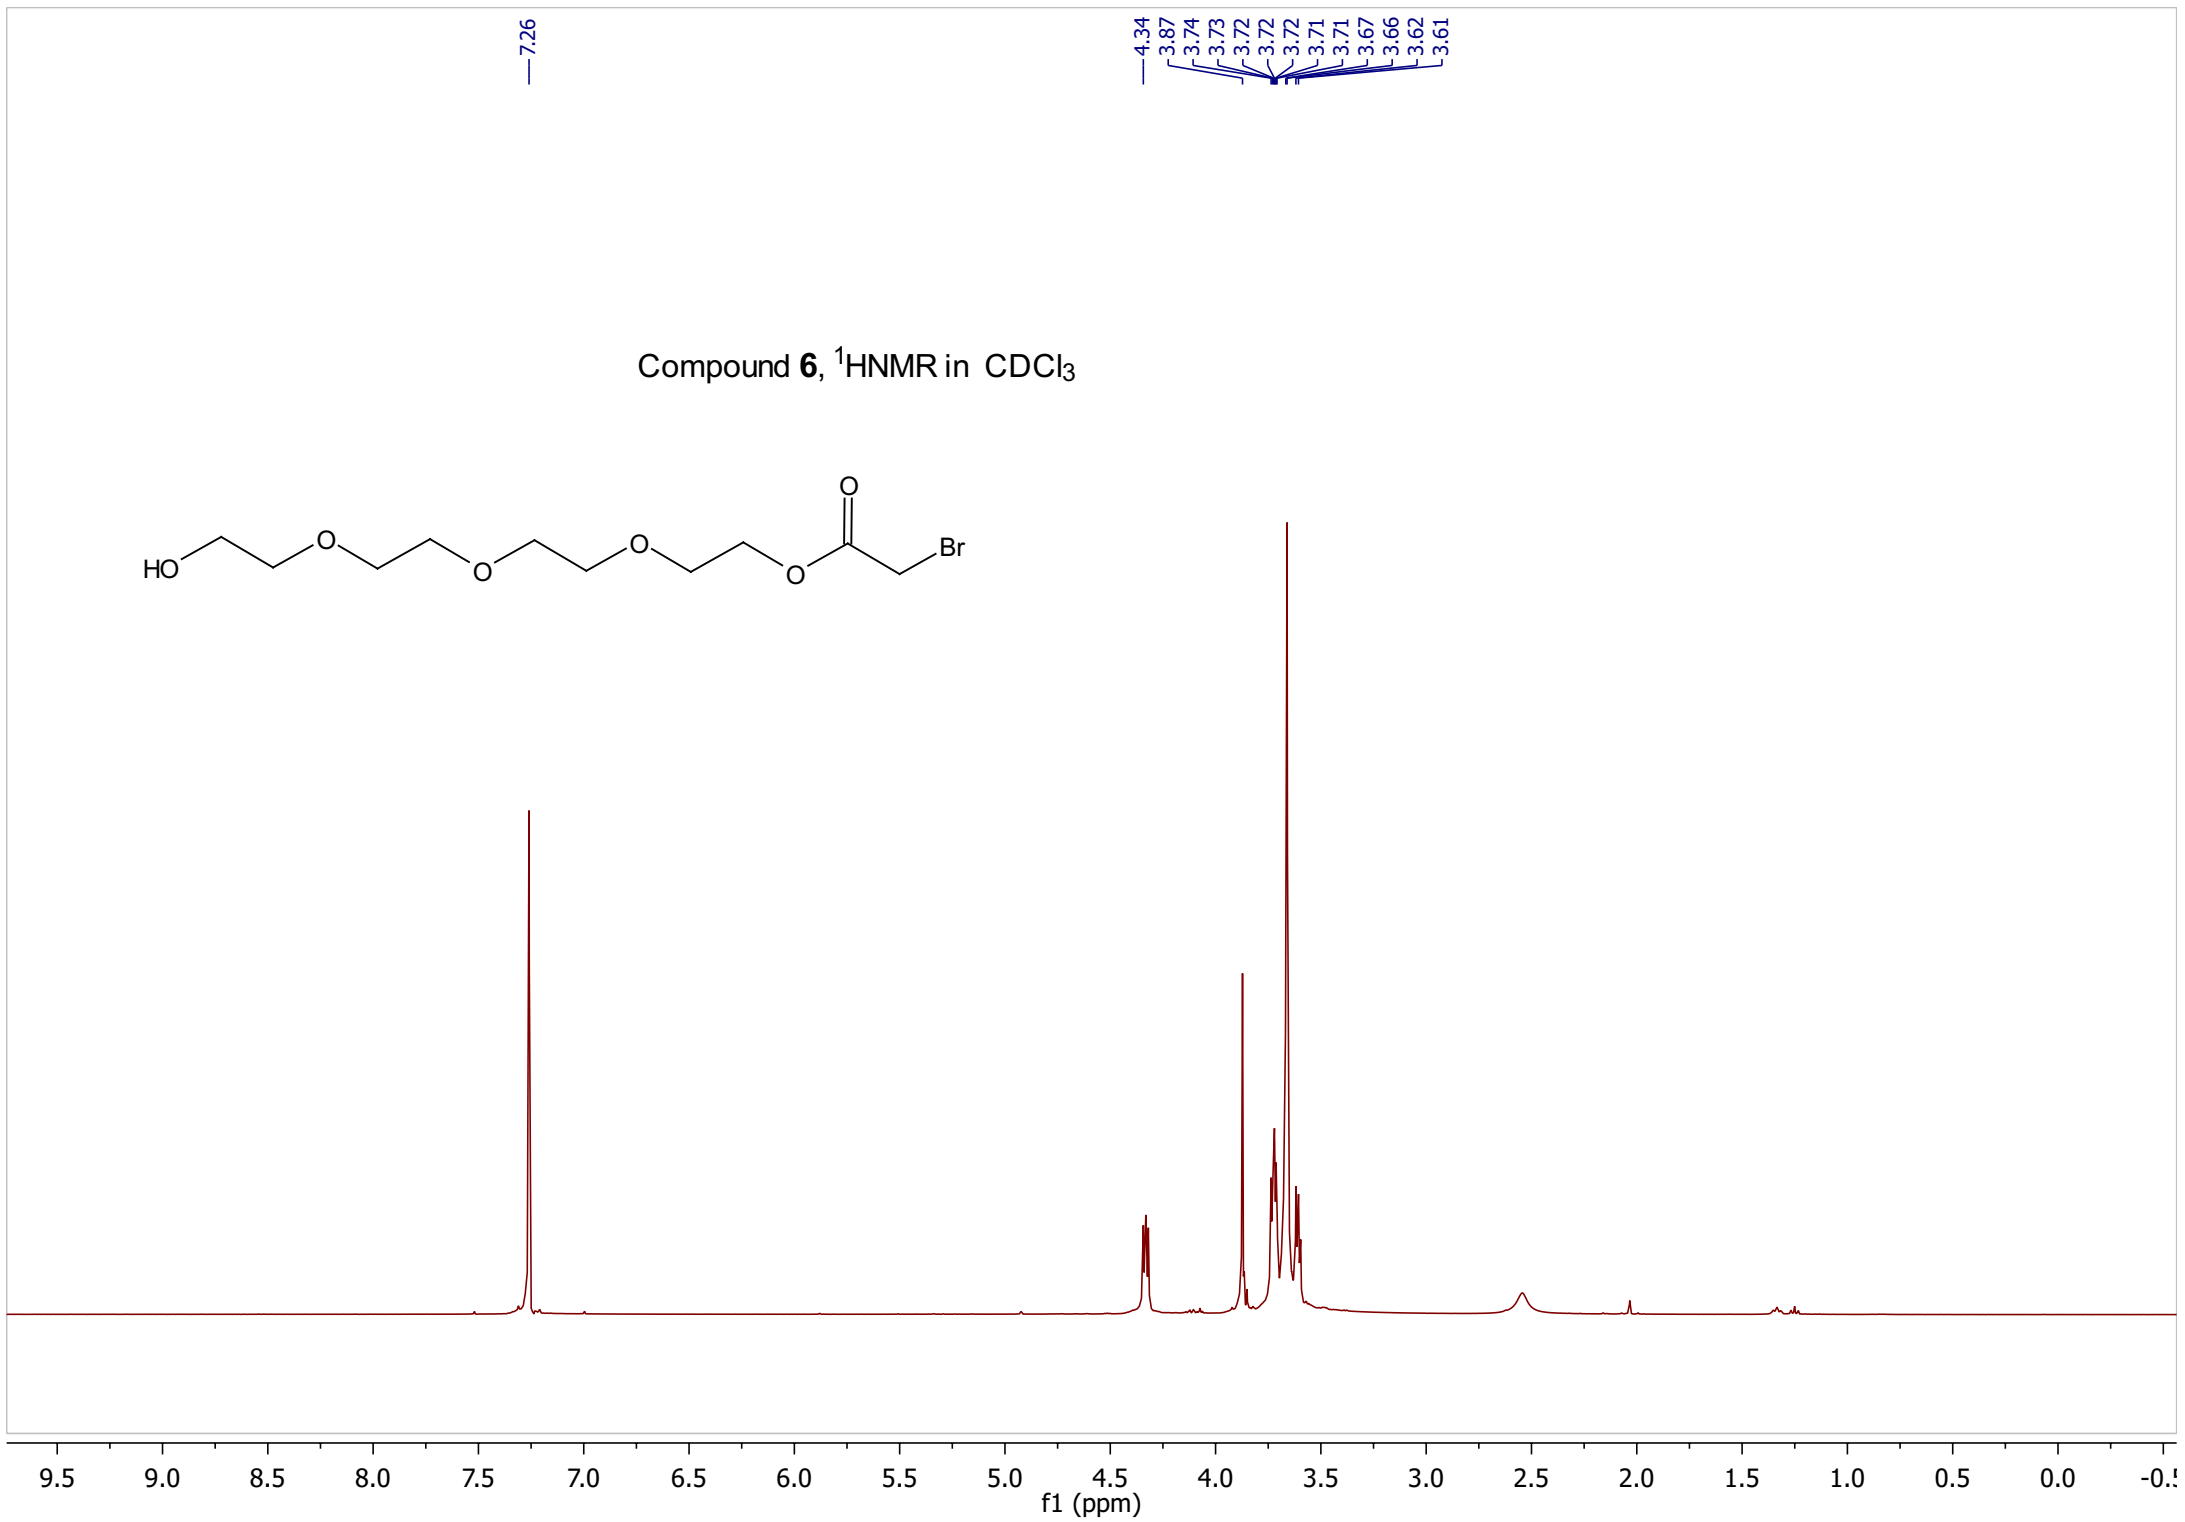



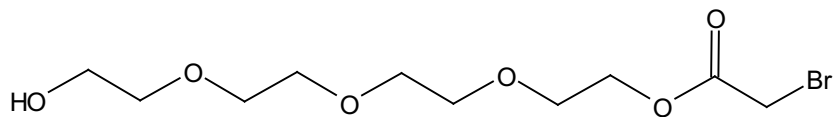

—167.23

77.33  
77.01  
76.69  
72.53  
70.65  
70.63  
70.52  
70.33  
68.77  
65.23  
61.74

—25.77

210 200 190 180 170 160 150 140 130 120 110 100 90 80 70 60 50 40 30 20 10 0 -10

f1 (ppm)

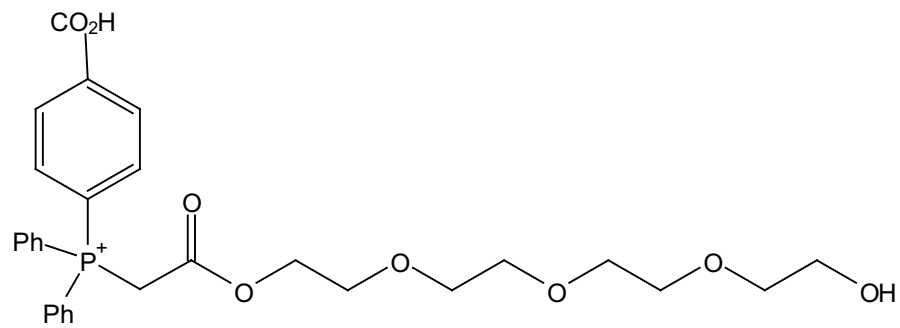

8.24  
8.23  
8.22  
8.21  
7.83  
7.81  
7.80  
7.79  
7.78  
7.75  
7.73  
7.73  
7.71  
7.70  
7.69  
7.68  
7.67  
7.66  
7.65  
7.64  
7.63  
4.14  
4.13  
4.13  
4.11  
3.57  
3.56  
3.52  
3.52  
3.51  
3.50  
3.49  
3.48  
3.47  
3.46  
3.32

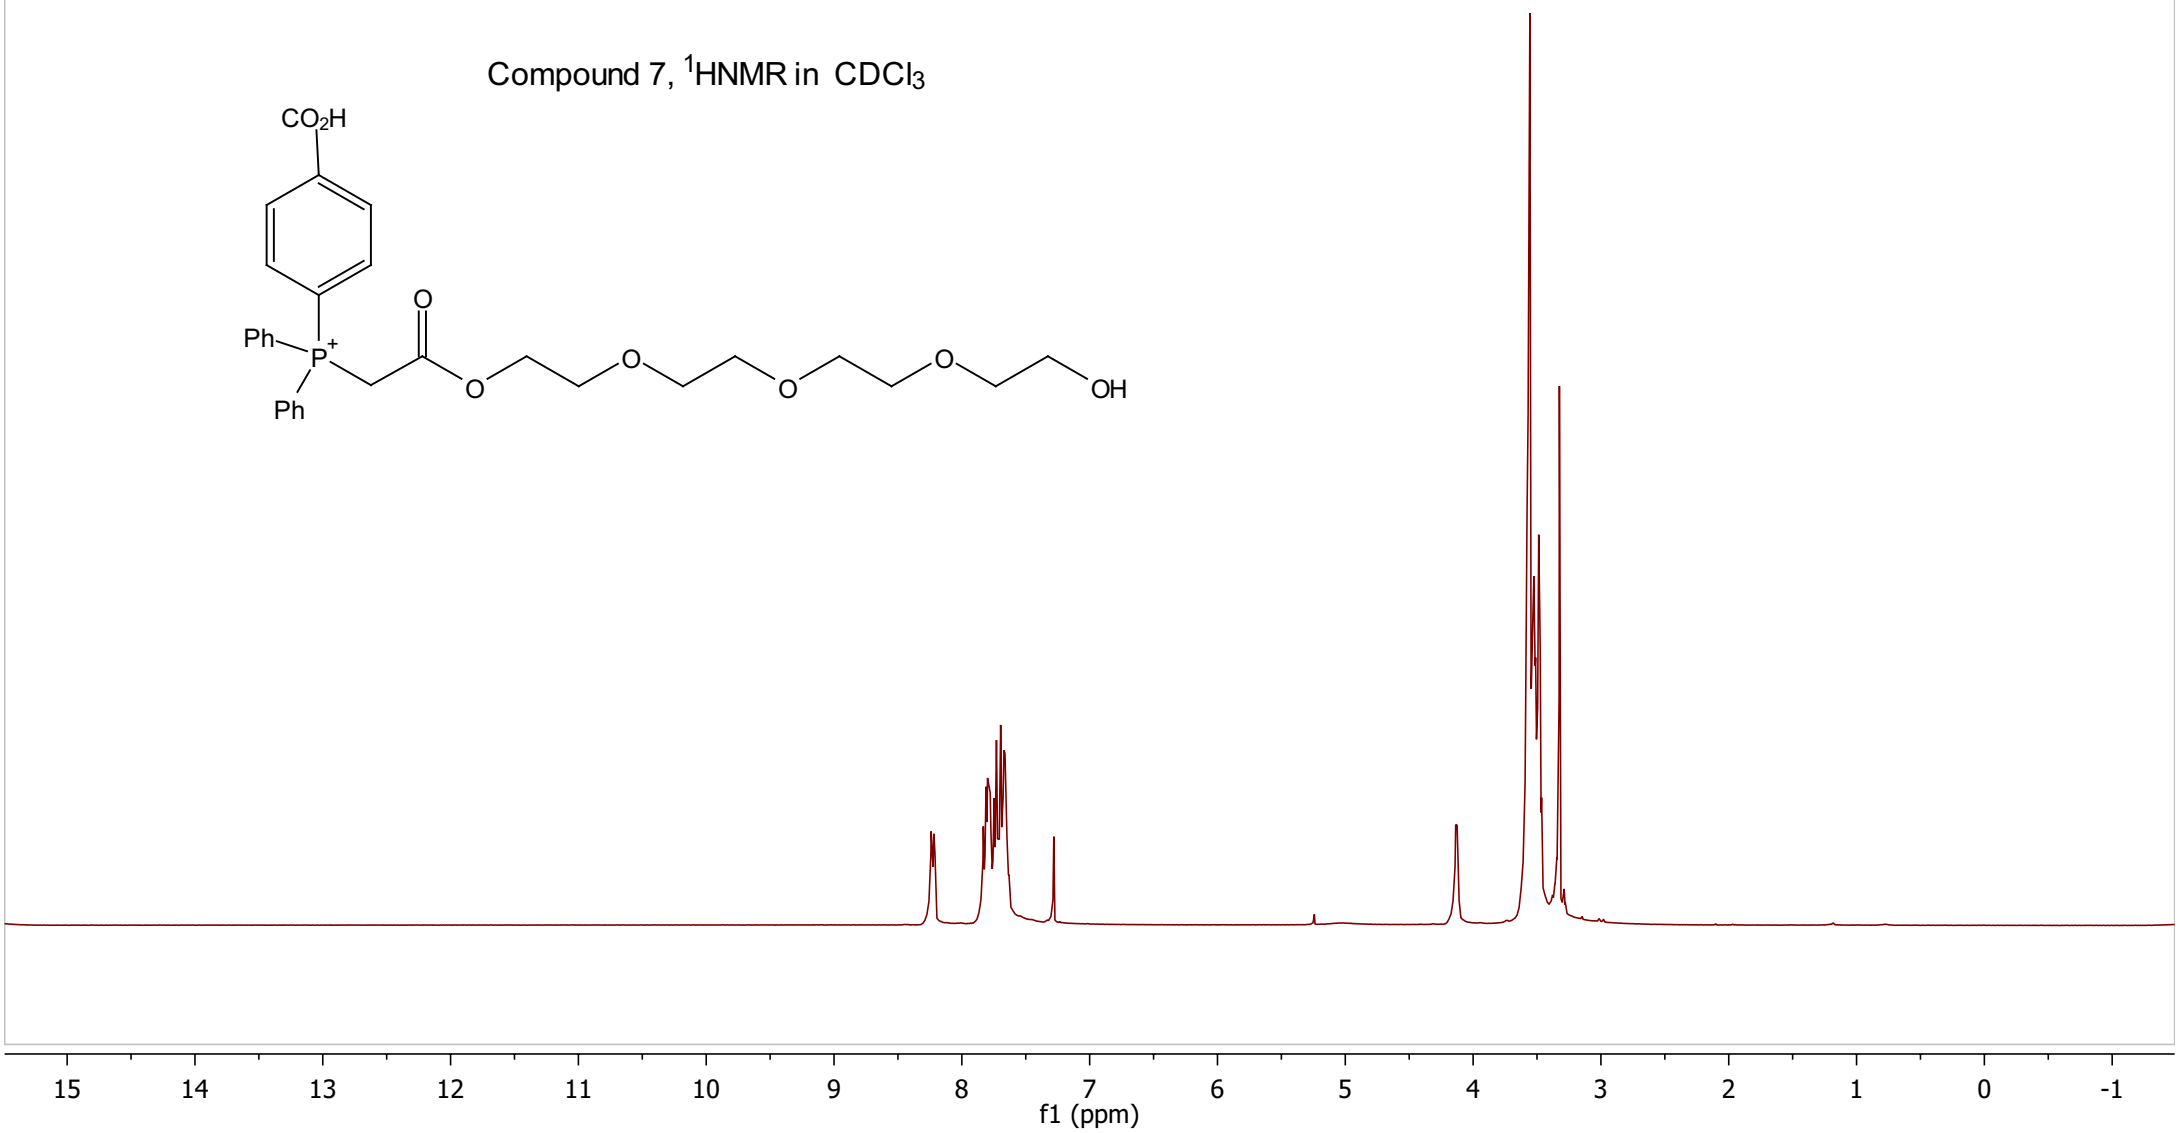

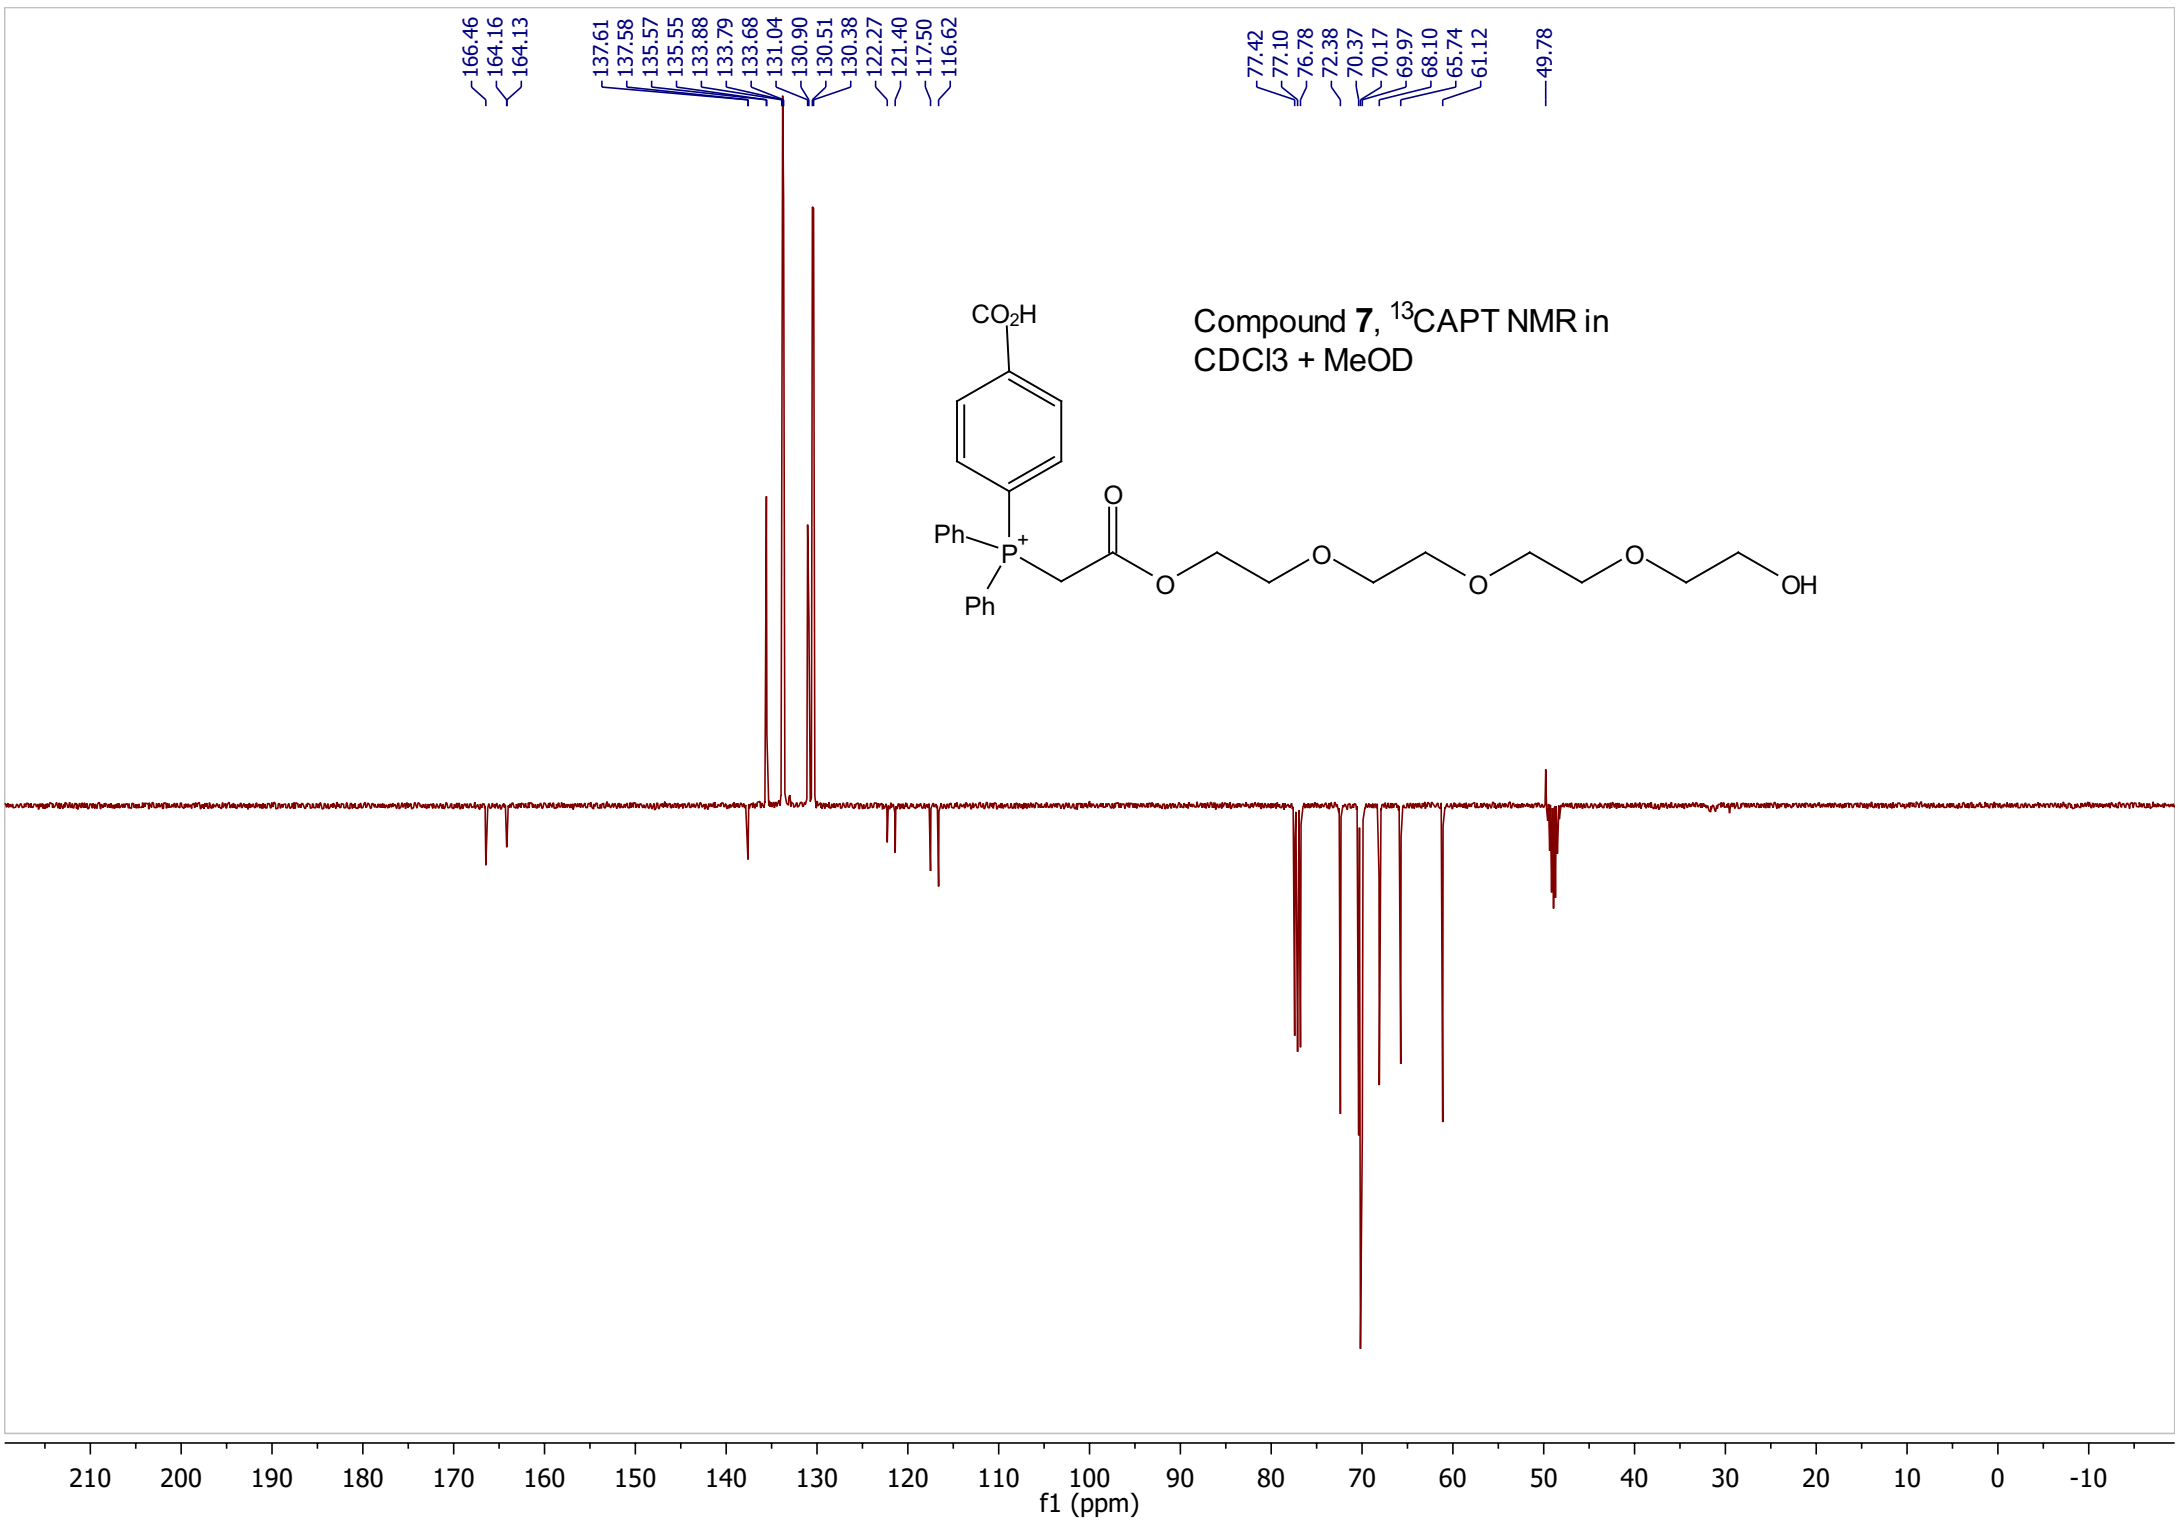

20.28

Compound 7, <sup>31</sup>P NMR in  
CDCl<sub>3</sub> + MeOD

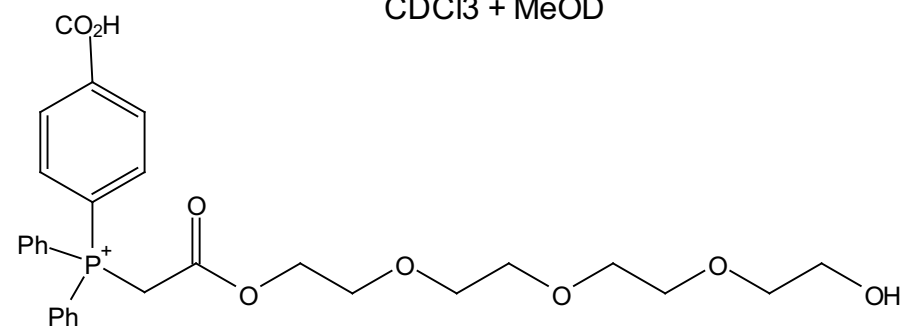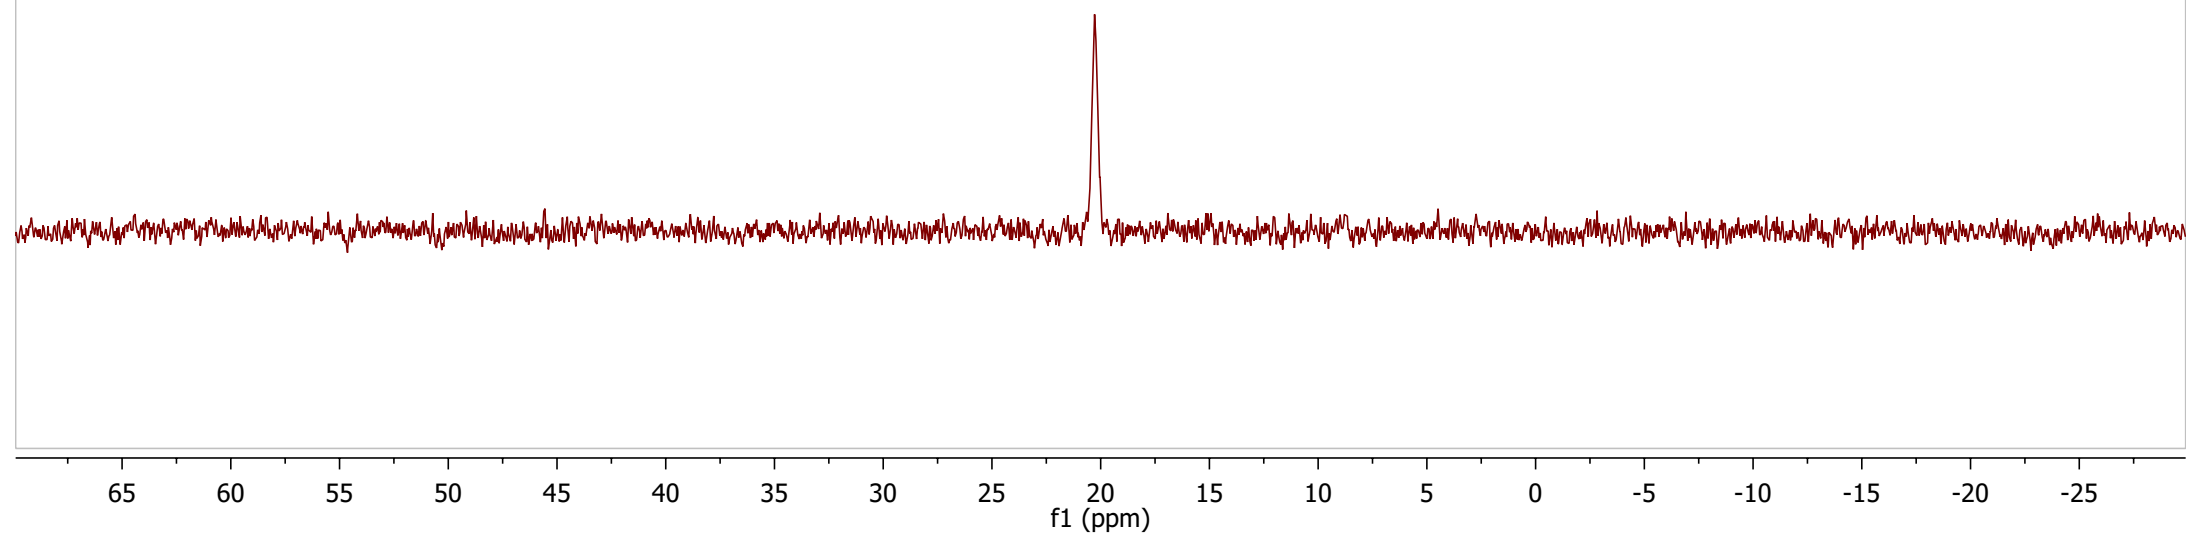

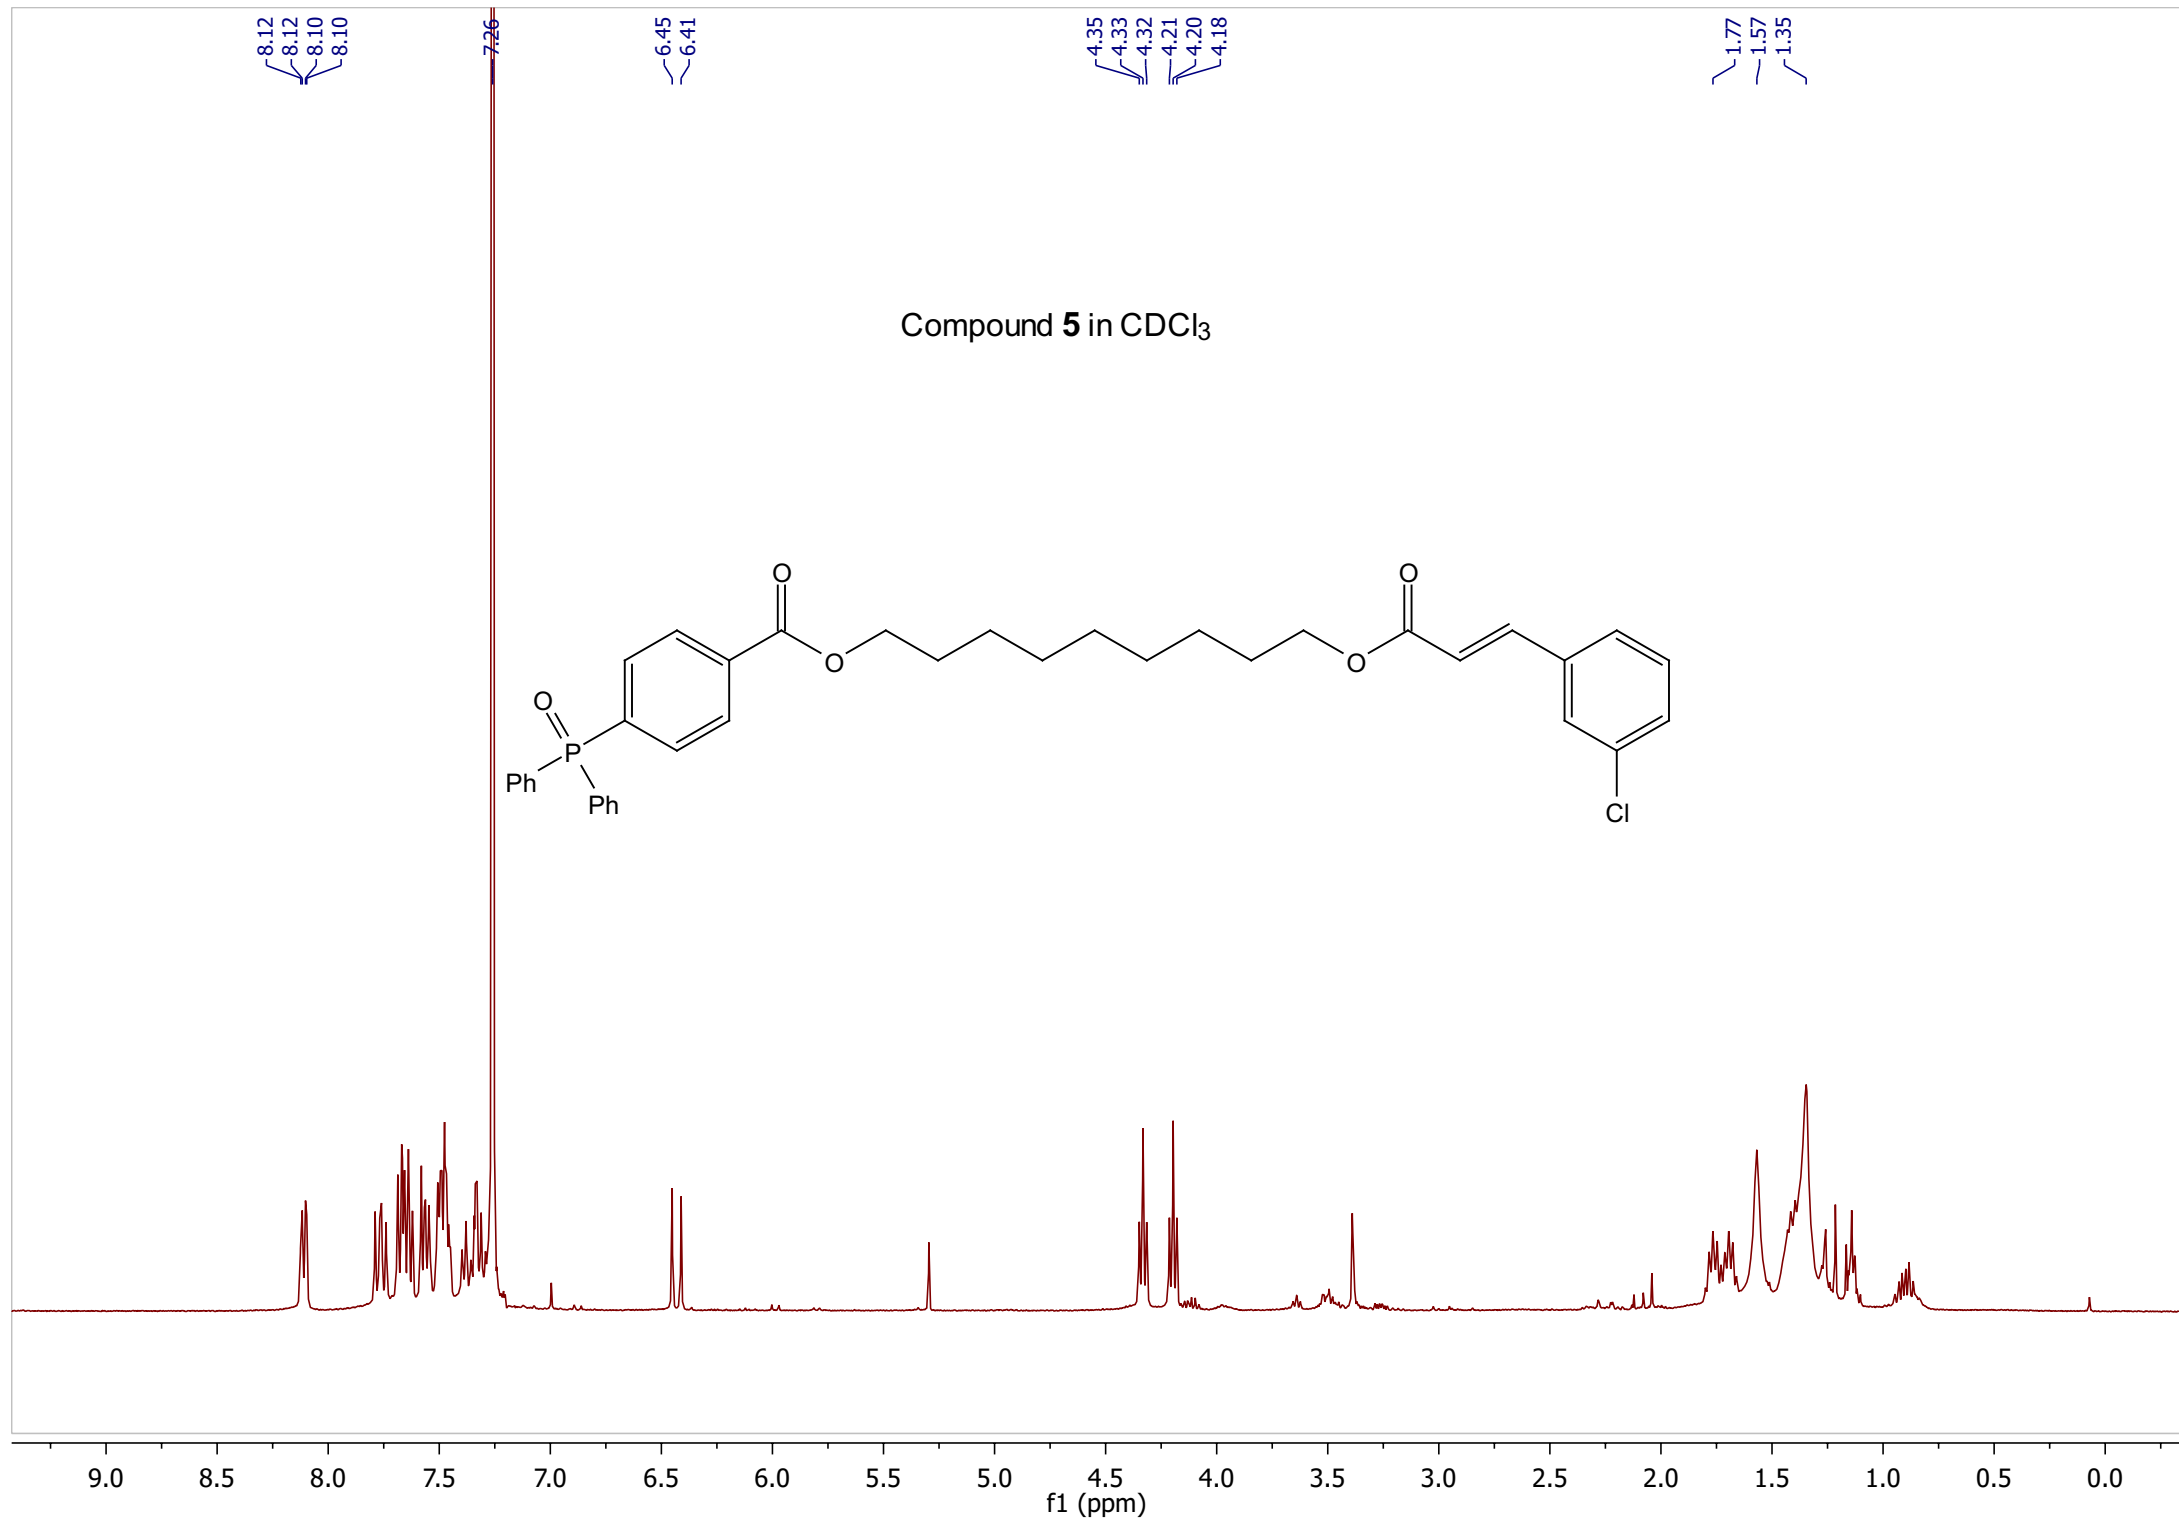

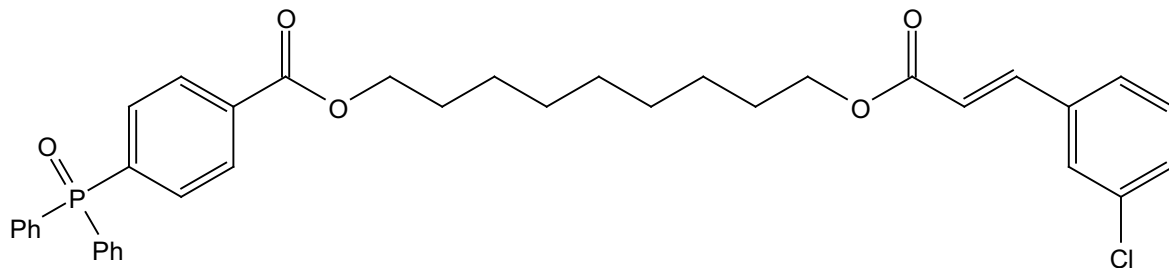

Compound 5 in CDCl<sub>3</sub>

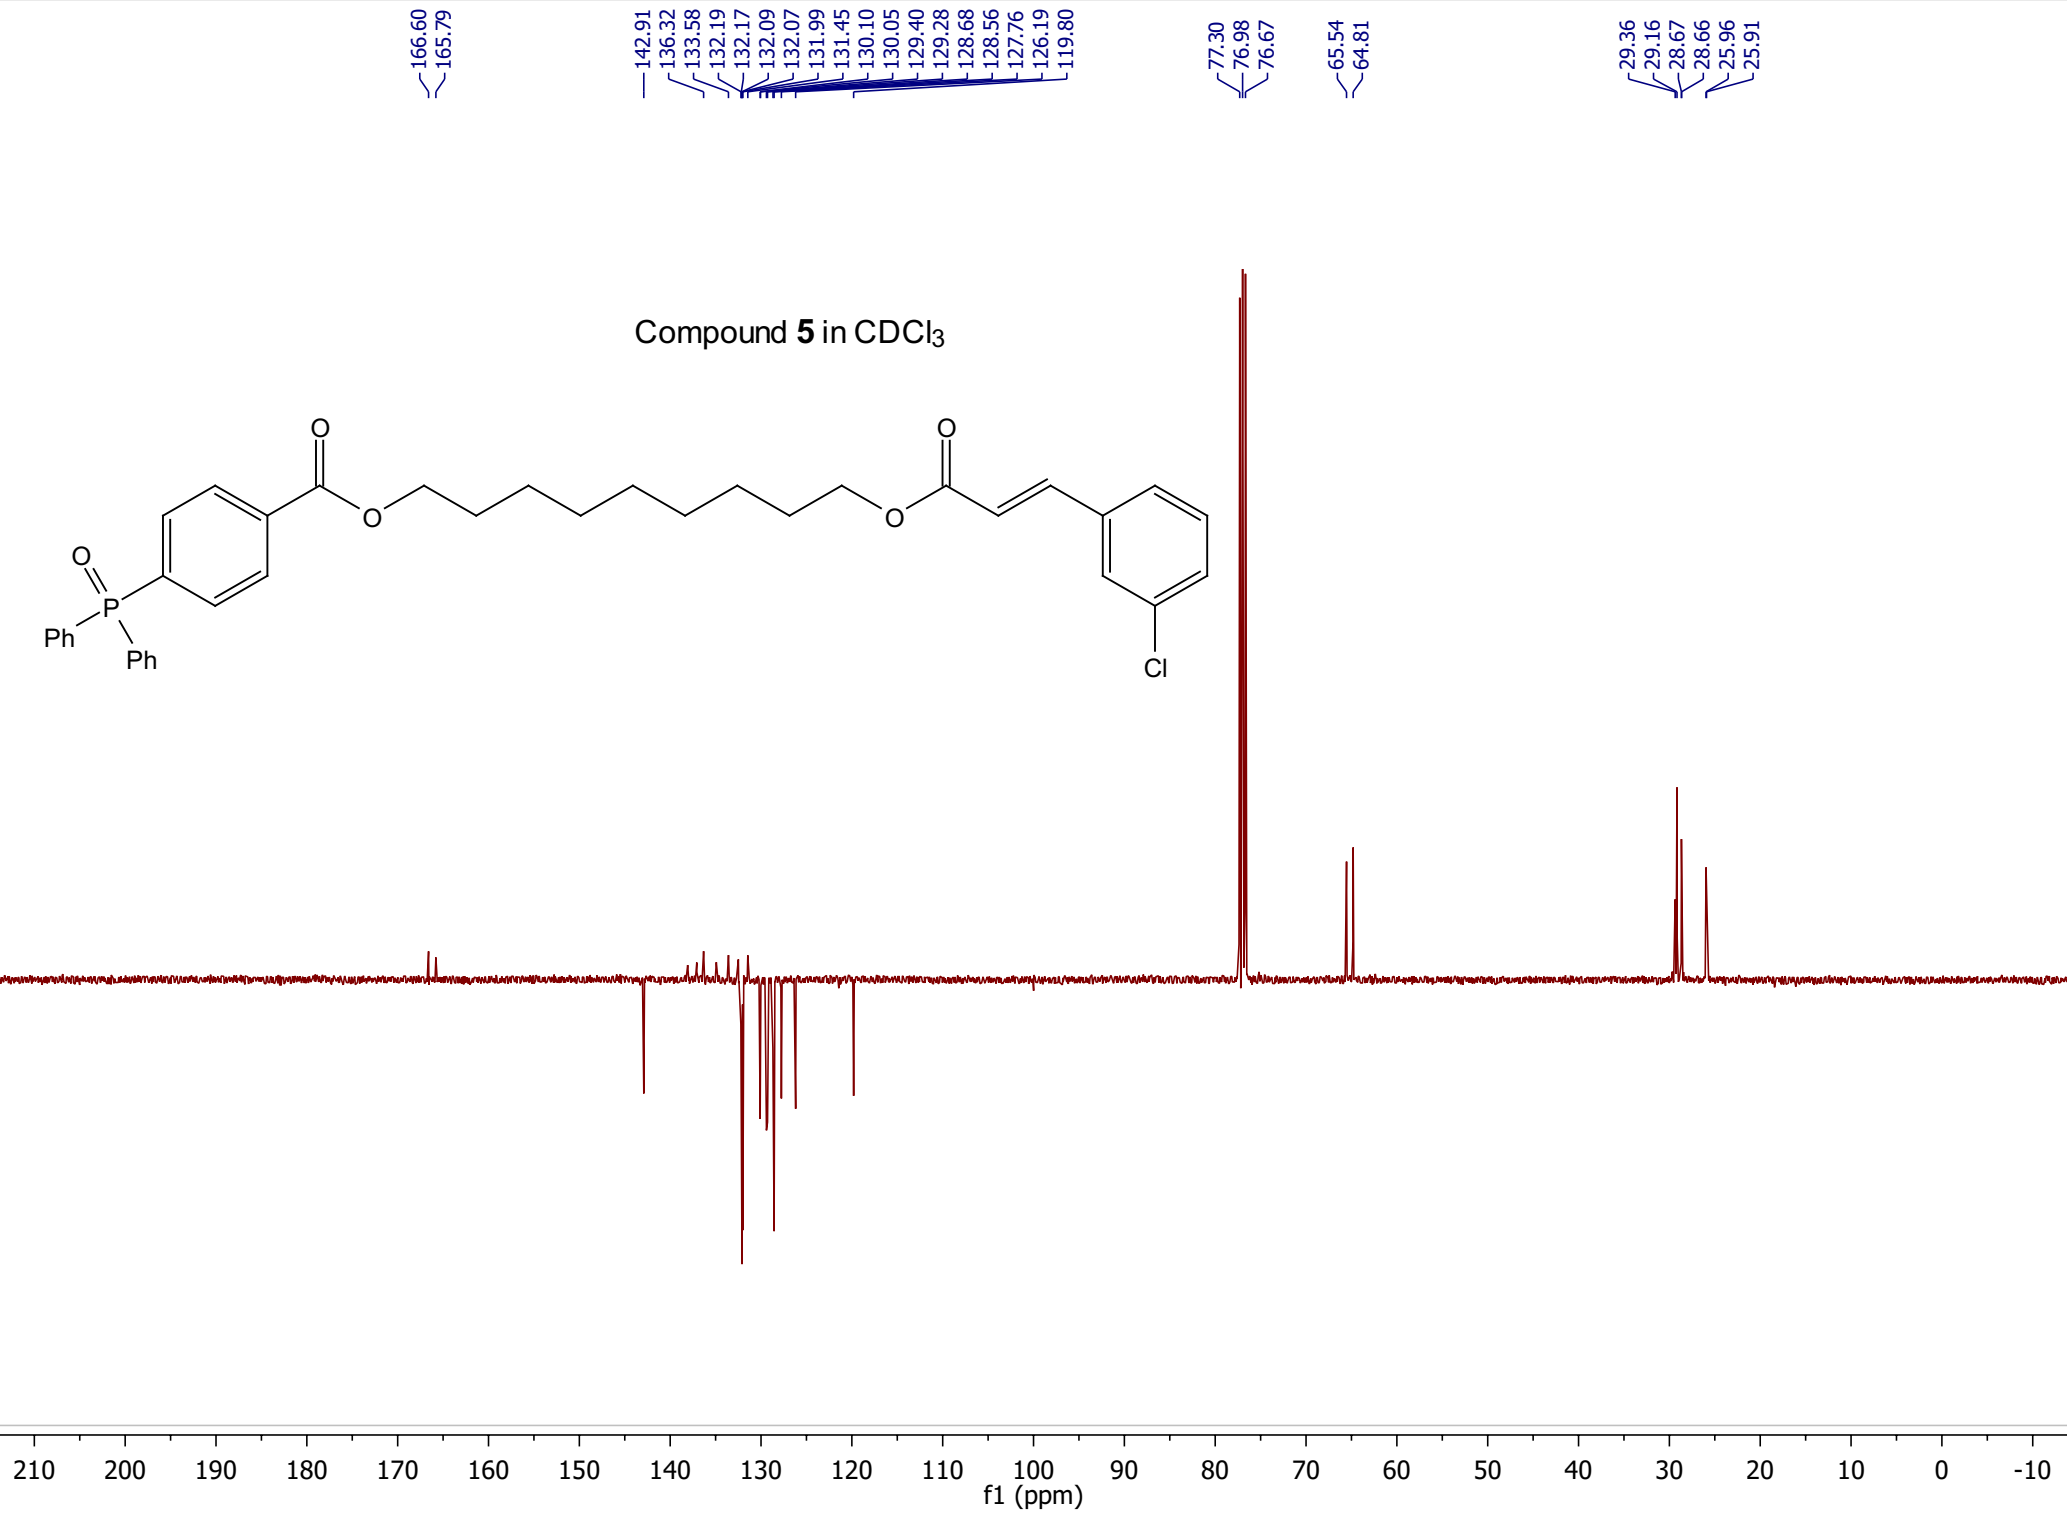

— 28.42

Compound **5** in CDCl<sub>3</sub>

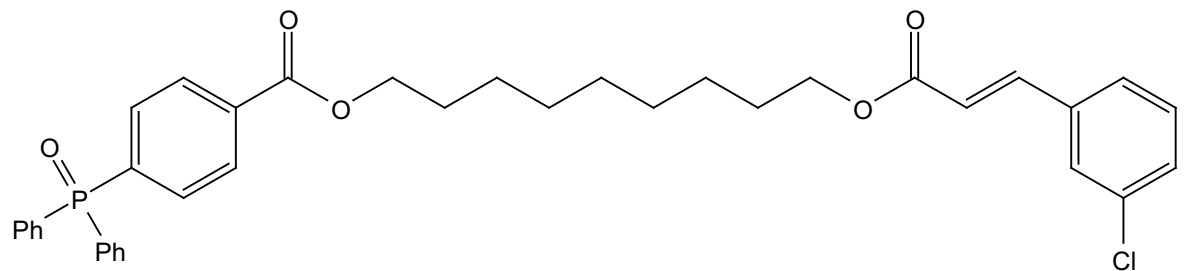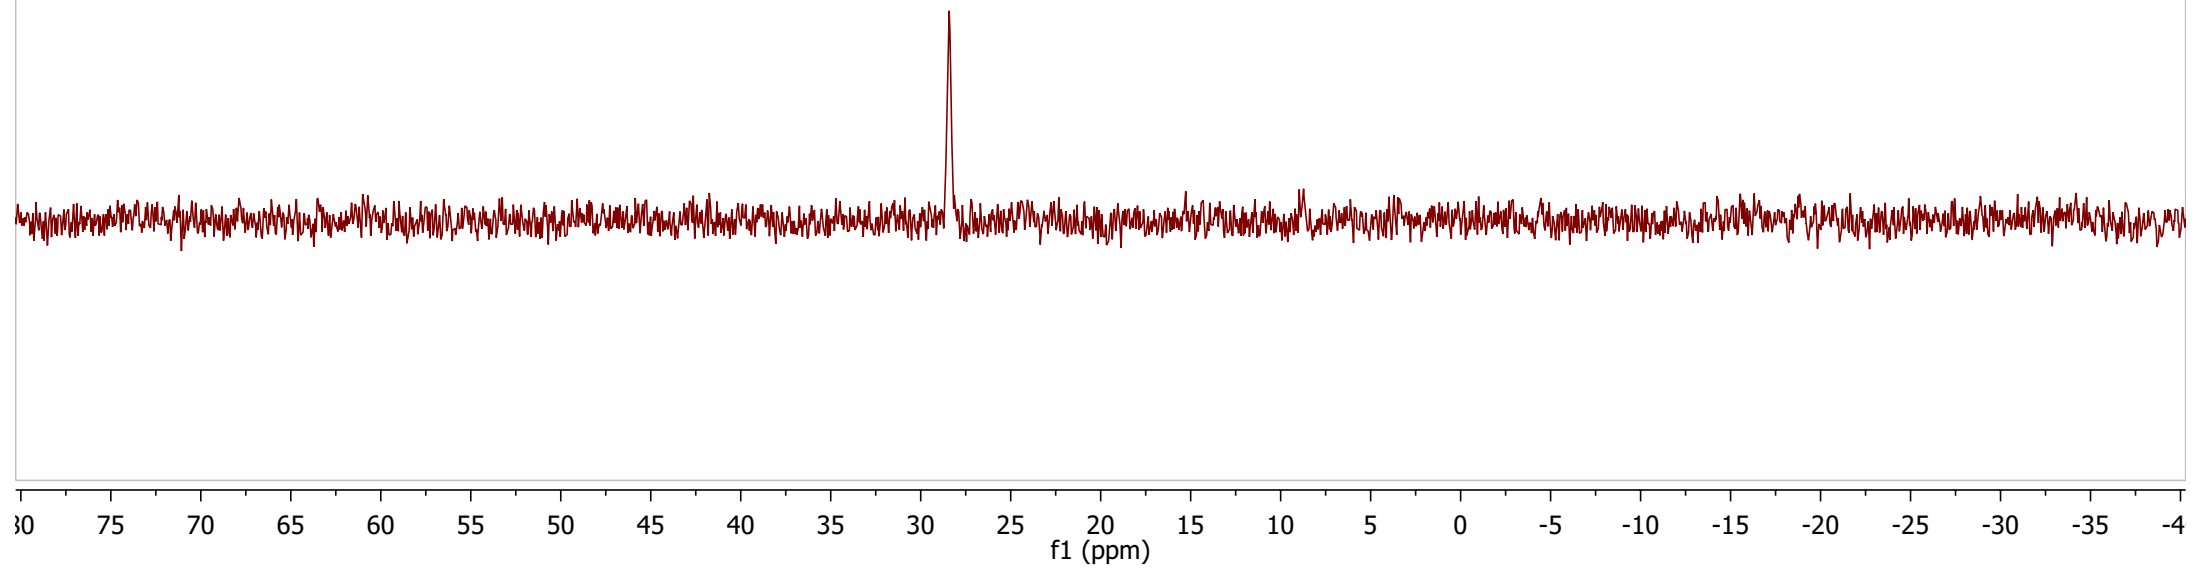

8.14  
8.13  
8.12  
8.11  
7.78  
7.76  
7.75  
7.73  
7.68  
7.66  
7.66  
7.65  
7.63  
7.63  
7.57  
7.56  
7.55  
7.49  
7.49  
7.48  
7.47  
7.47  
7.26  
6.99  
6.98  
6.97  
6.95  
5.85  
5.84  
5.84  
5.81  
5.81  
4.50  
4.49  
4.47  
4.27  
4.25  
4.24  
3.83  
3.82  
3.81  
3.66  
3.63  
2.19  
2.18  
2.17  
1.45  
1.43  
1.42  
1.40  
1.33  
1.31  
1.26  
0.89  
0.87  
0.85

Nony

Compound **9a**, <sup>1</sup>H NMR in CDCl<sub>3</sub>

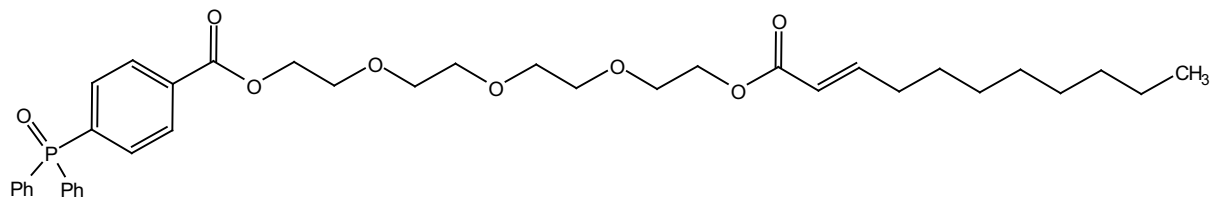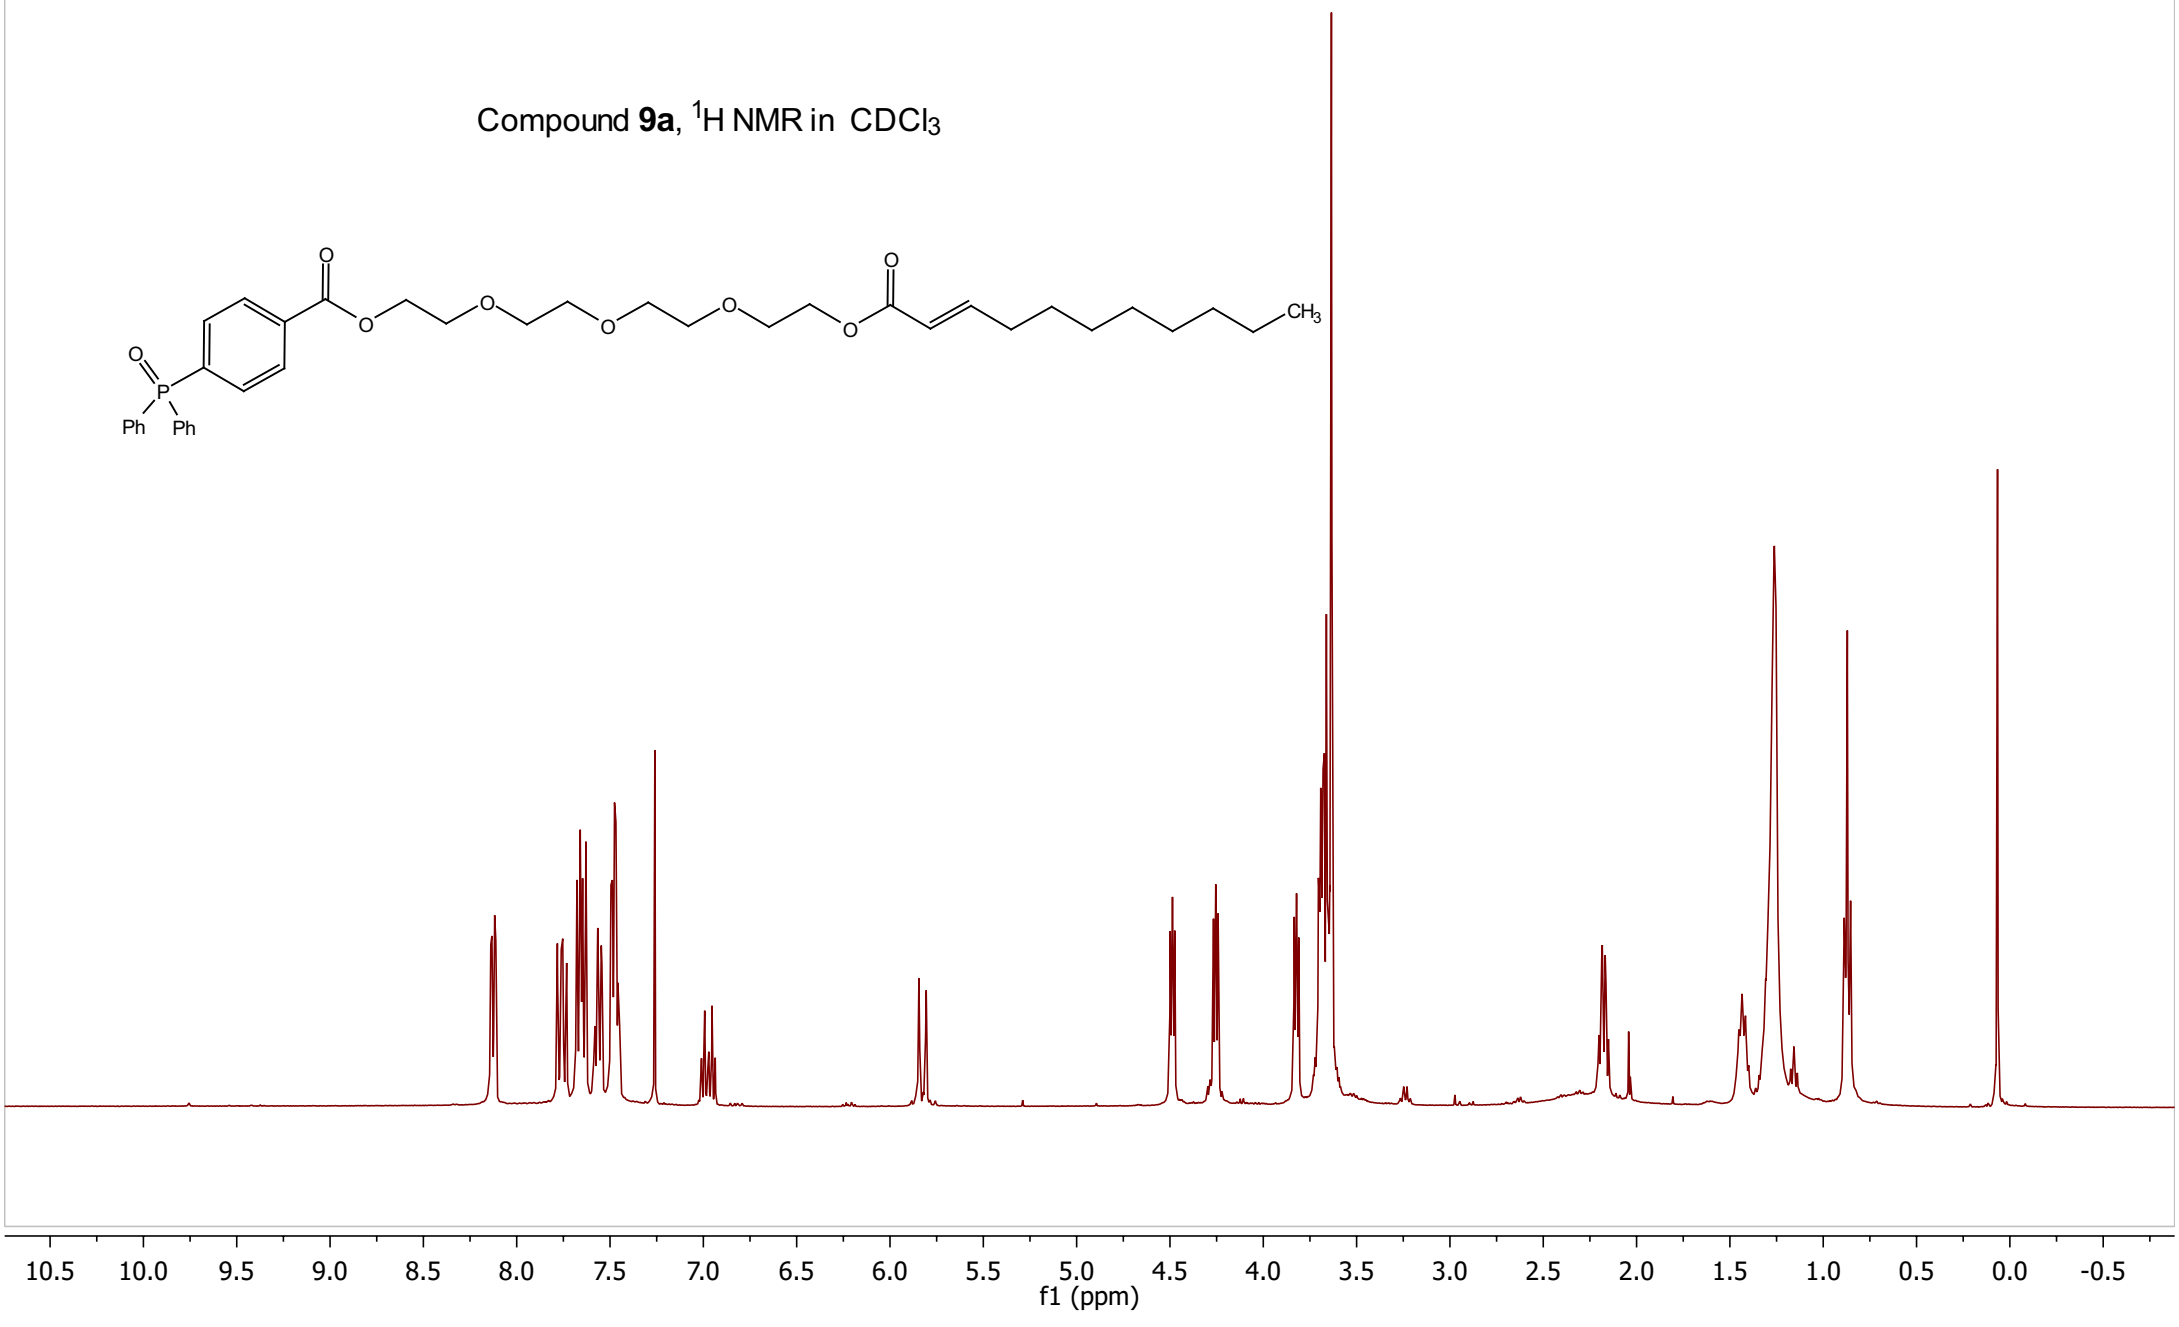



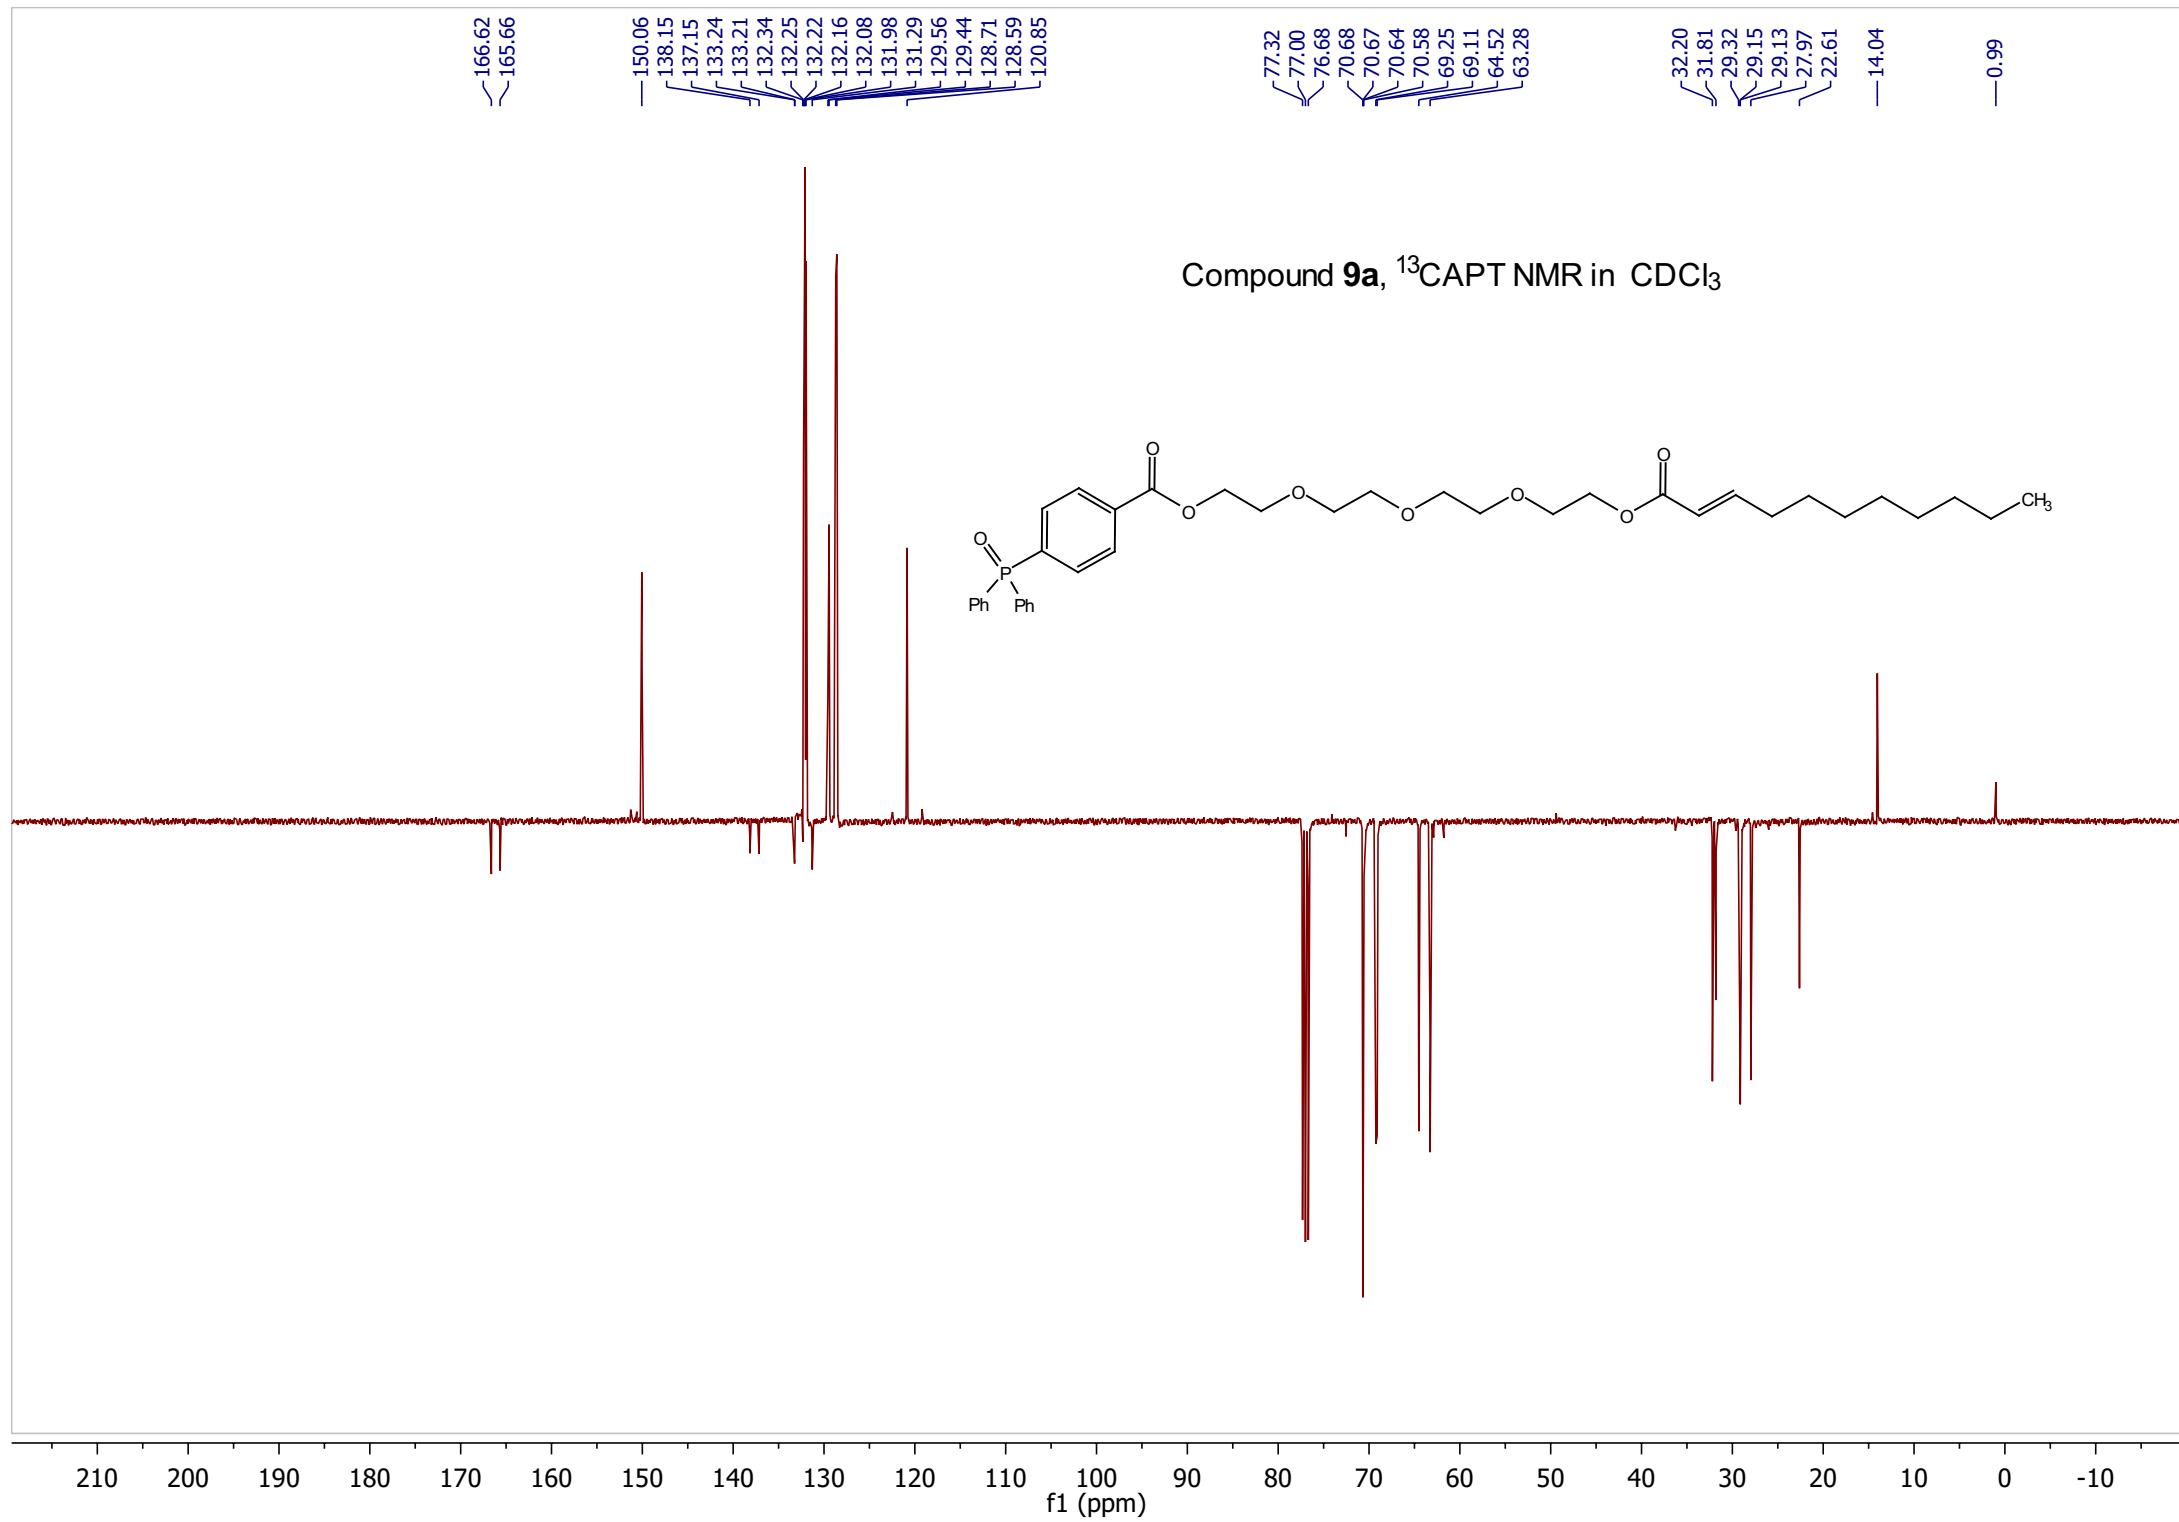

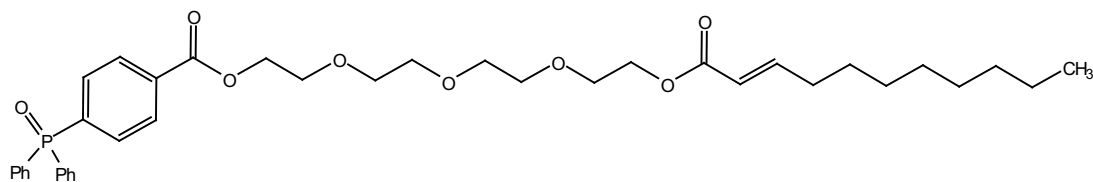

Compound 9a, <sup>13</sup>C NMR in MeOD

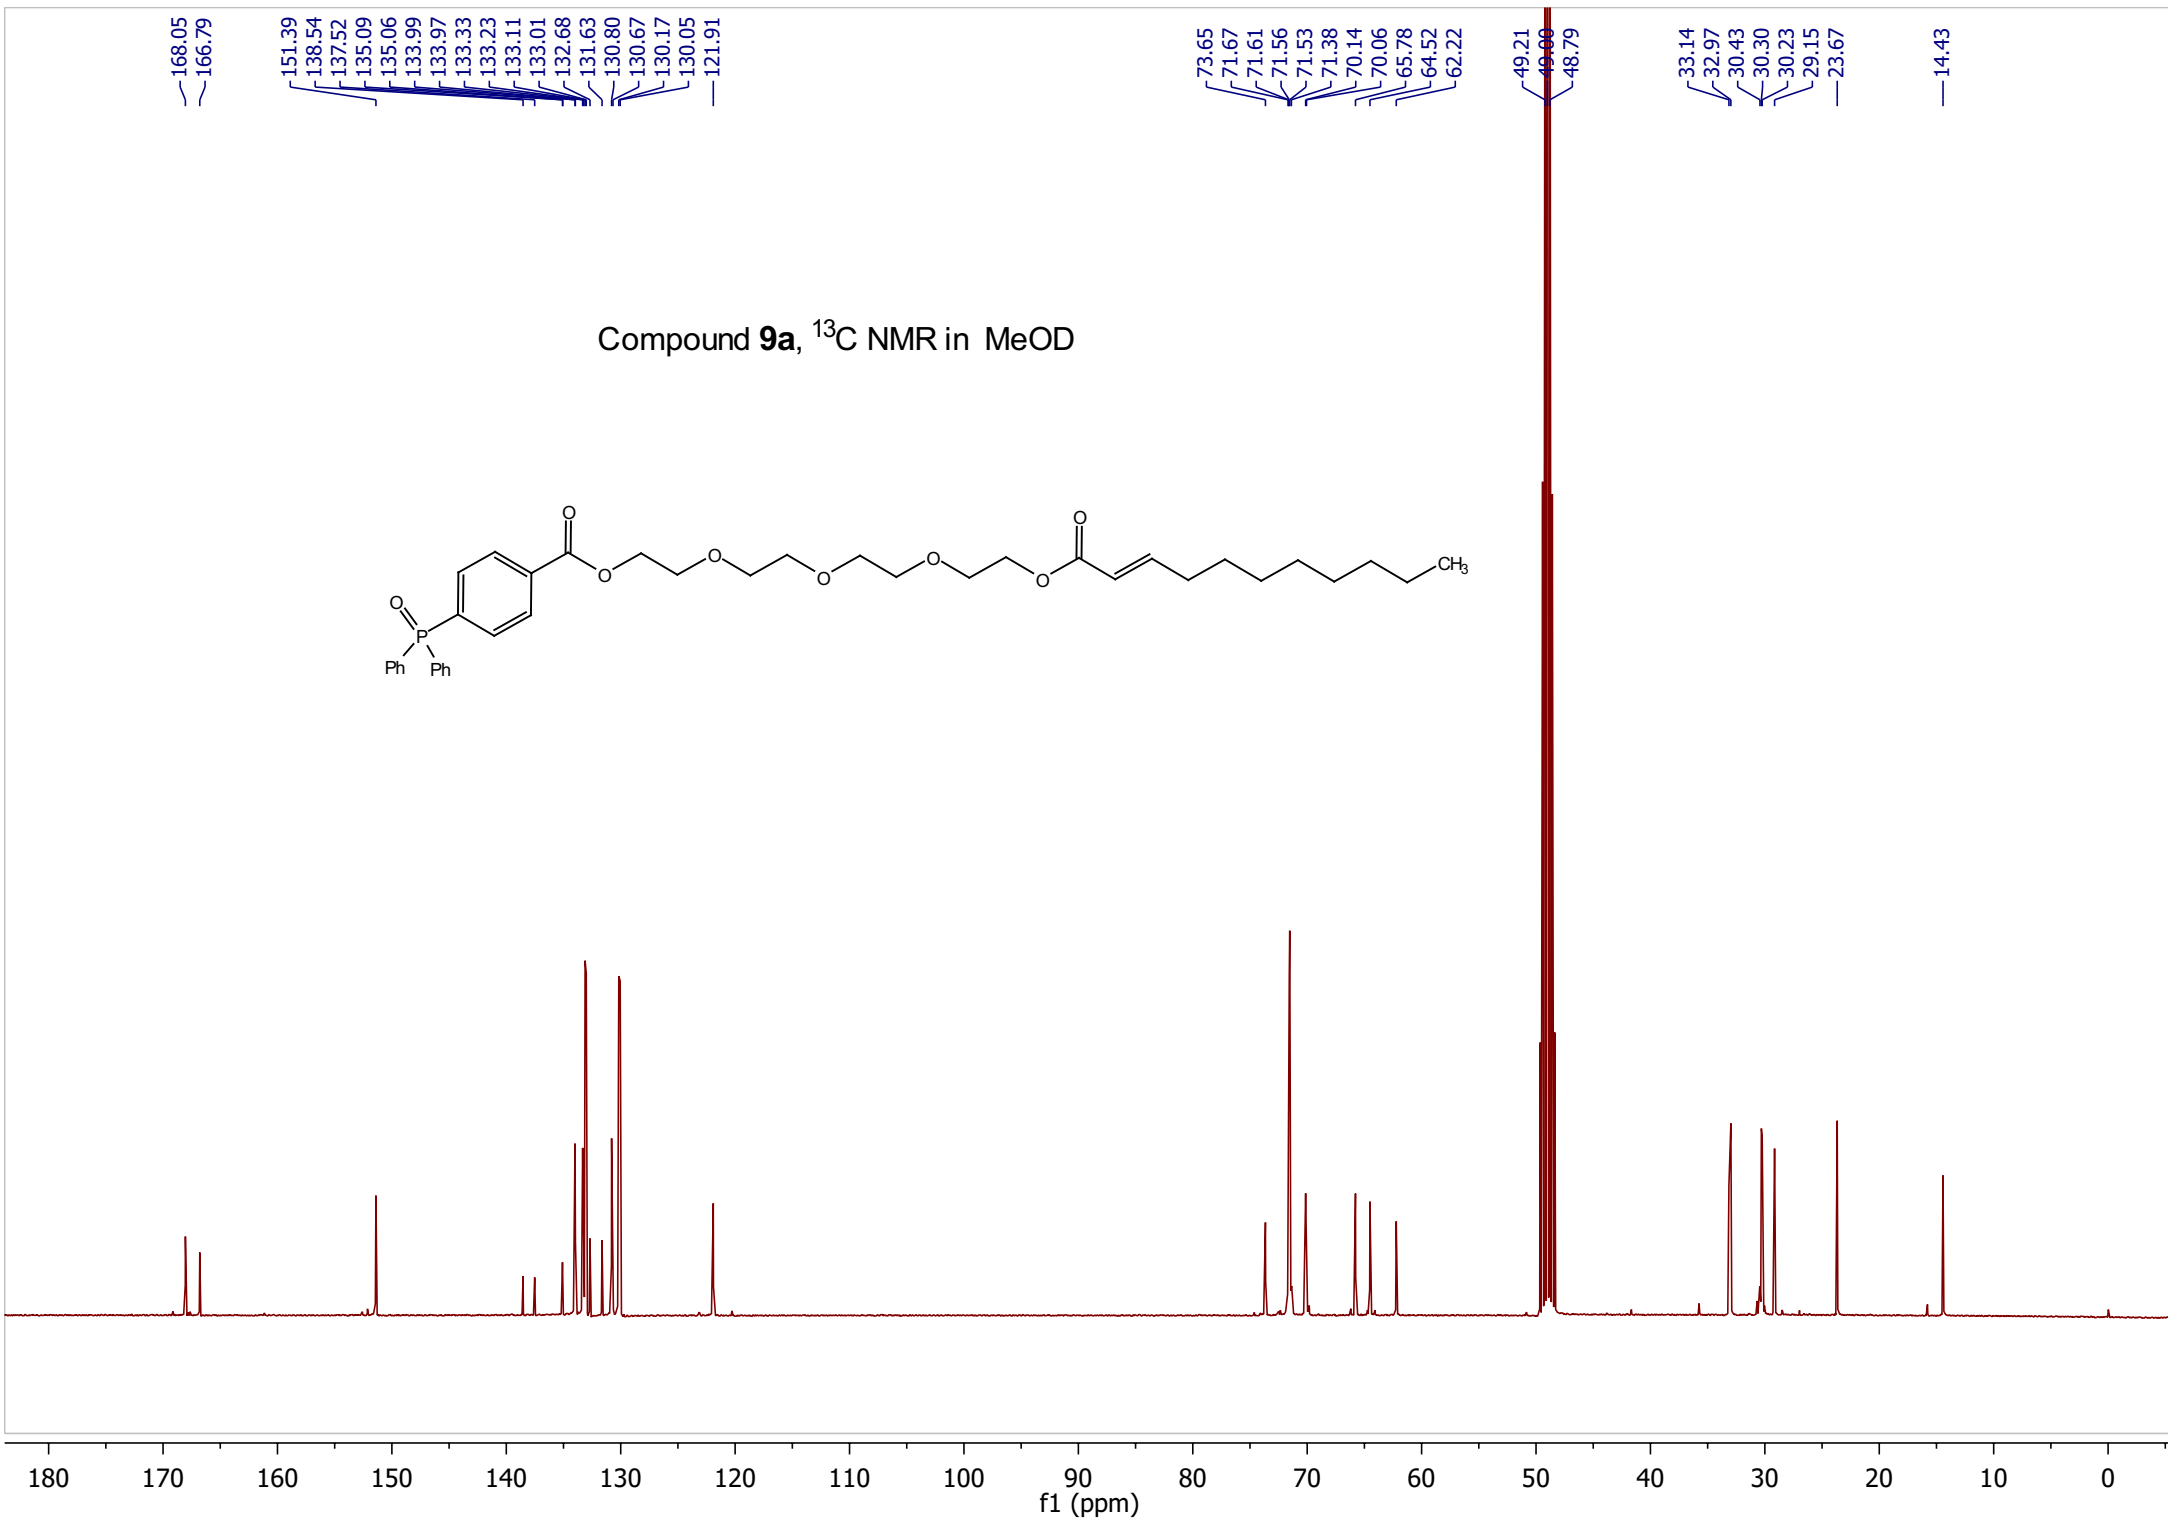

Compound **9a**,  $^{31}\text{P}$  NMR in  $\text{CDCl}_3$

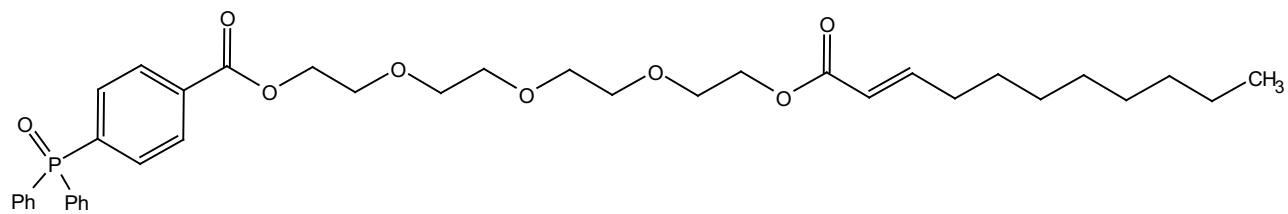

— 28.38

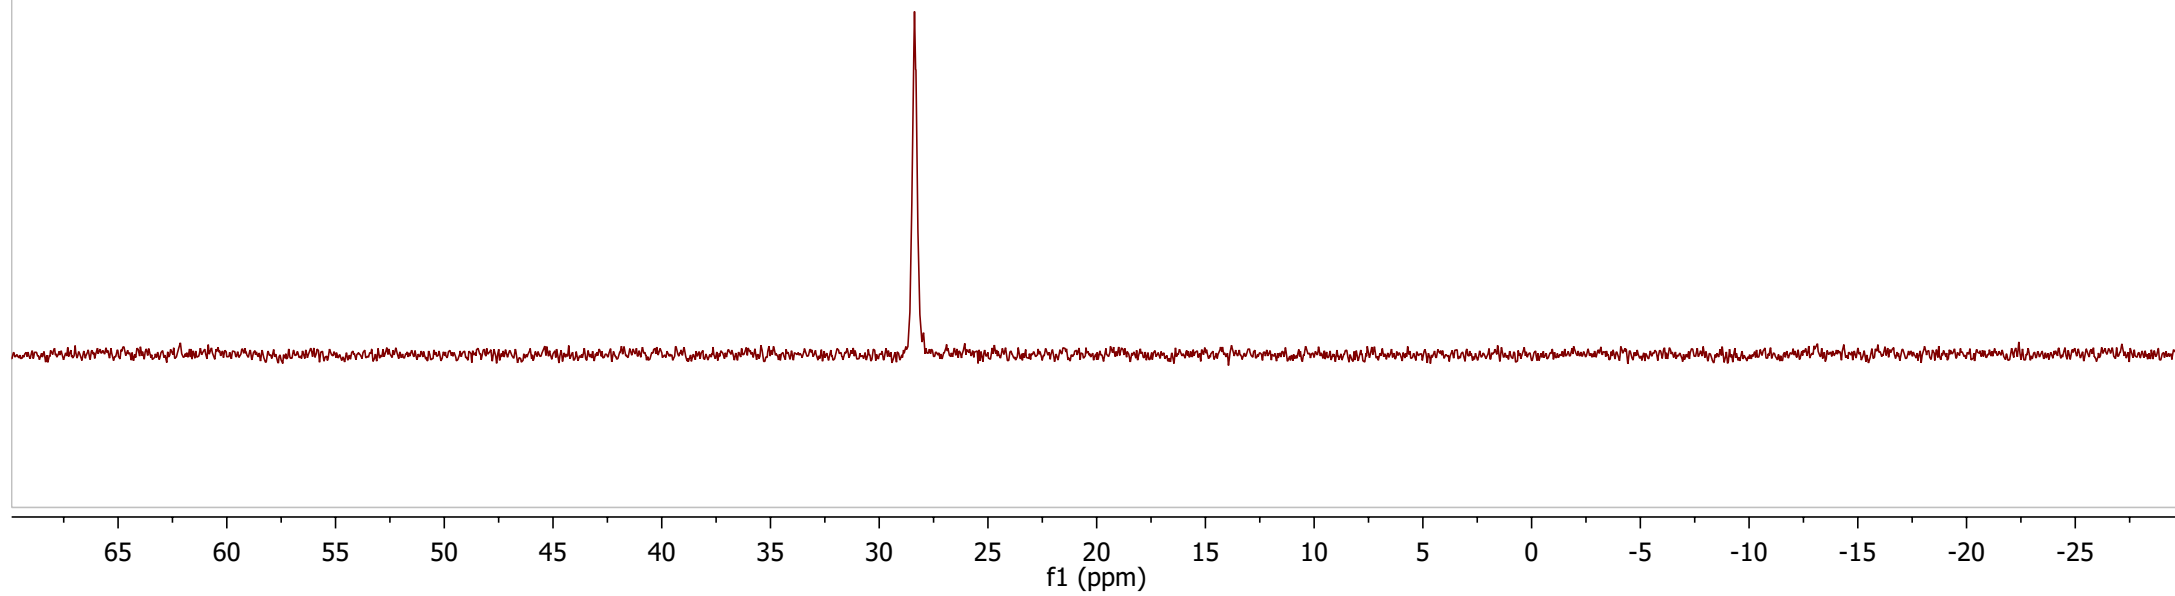

Compound **9b**,  $^1\text{H}$  NMR in MeOD

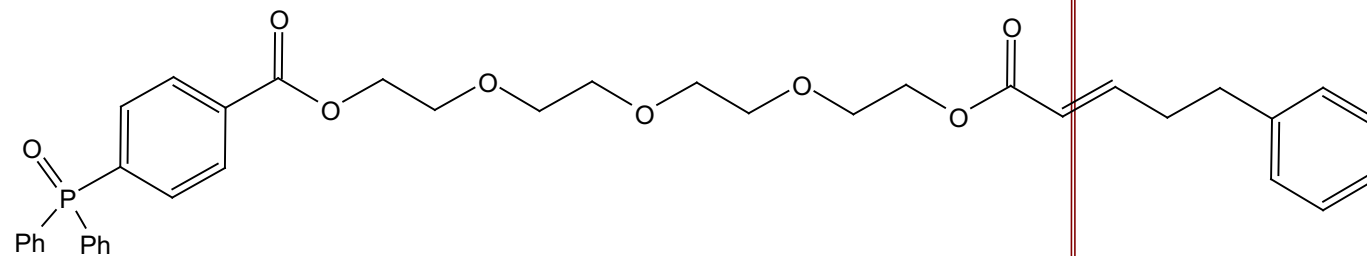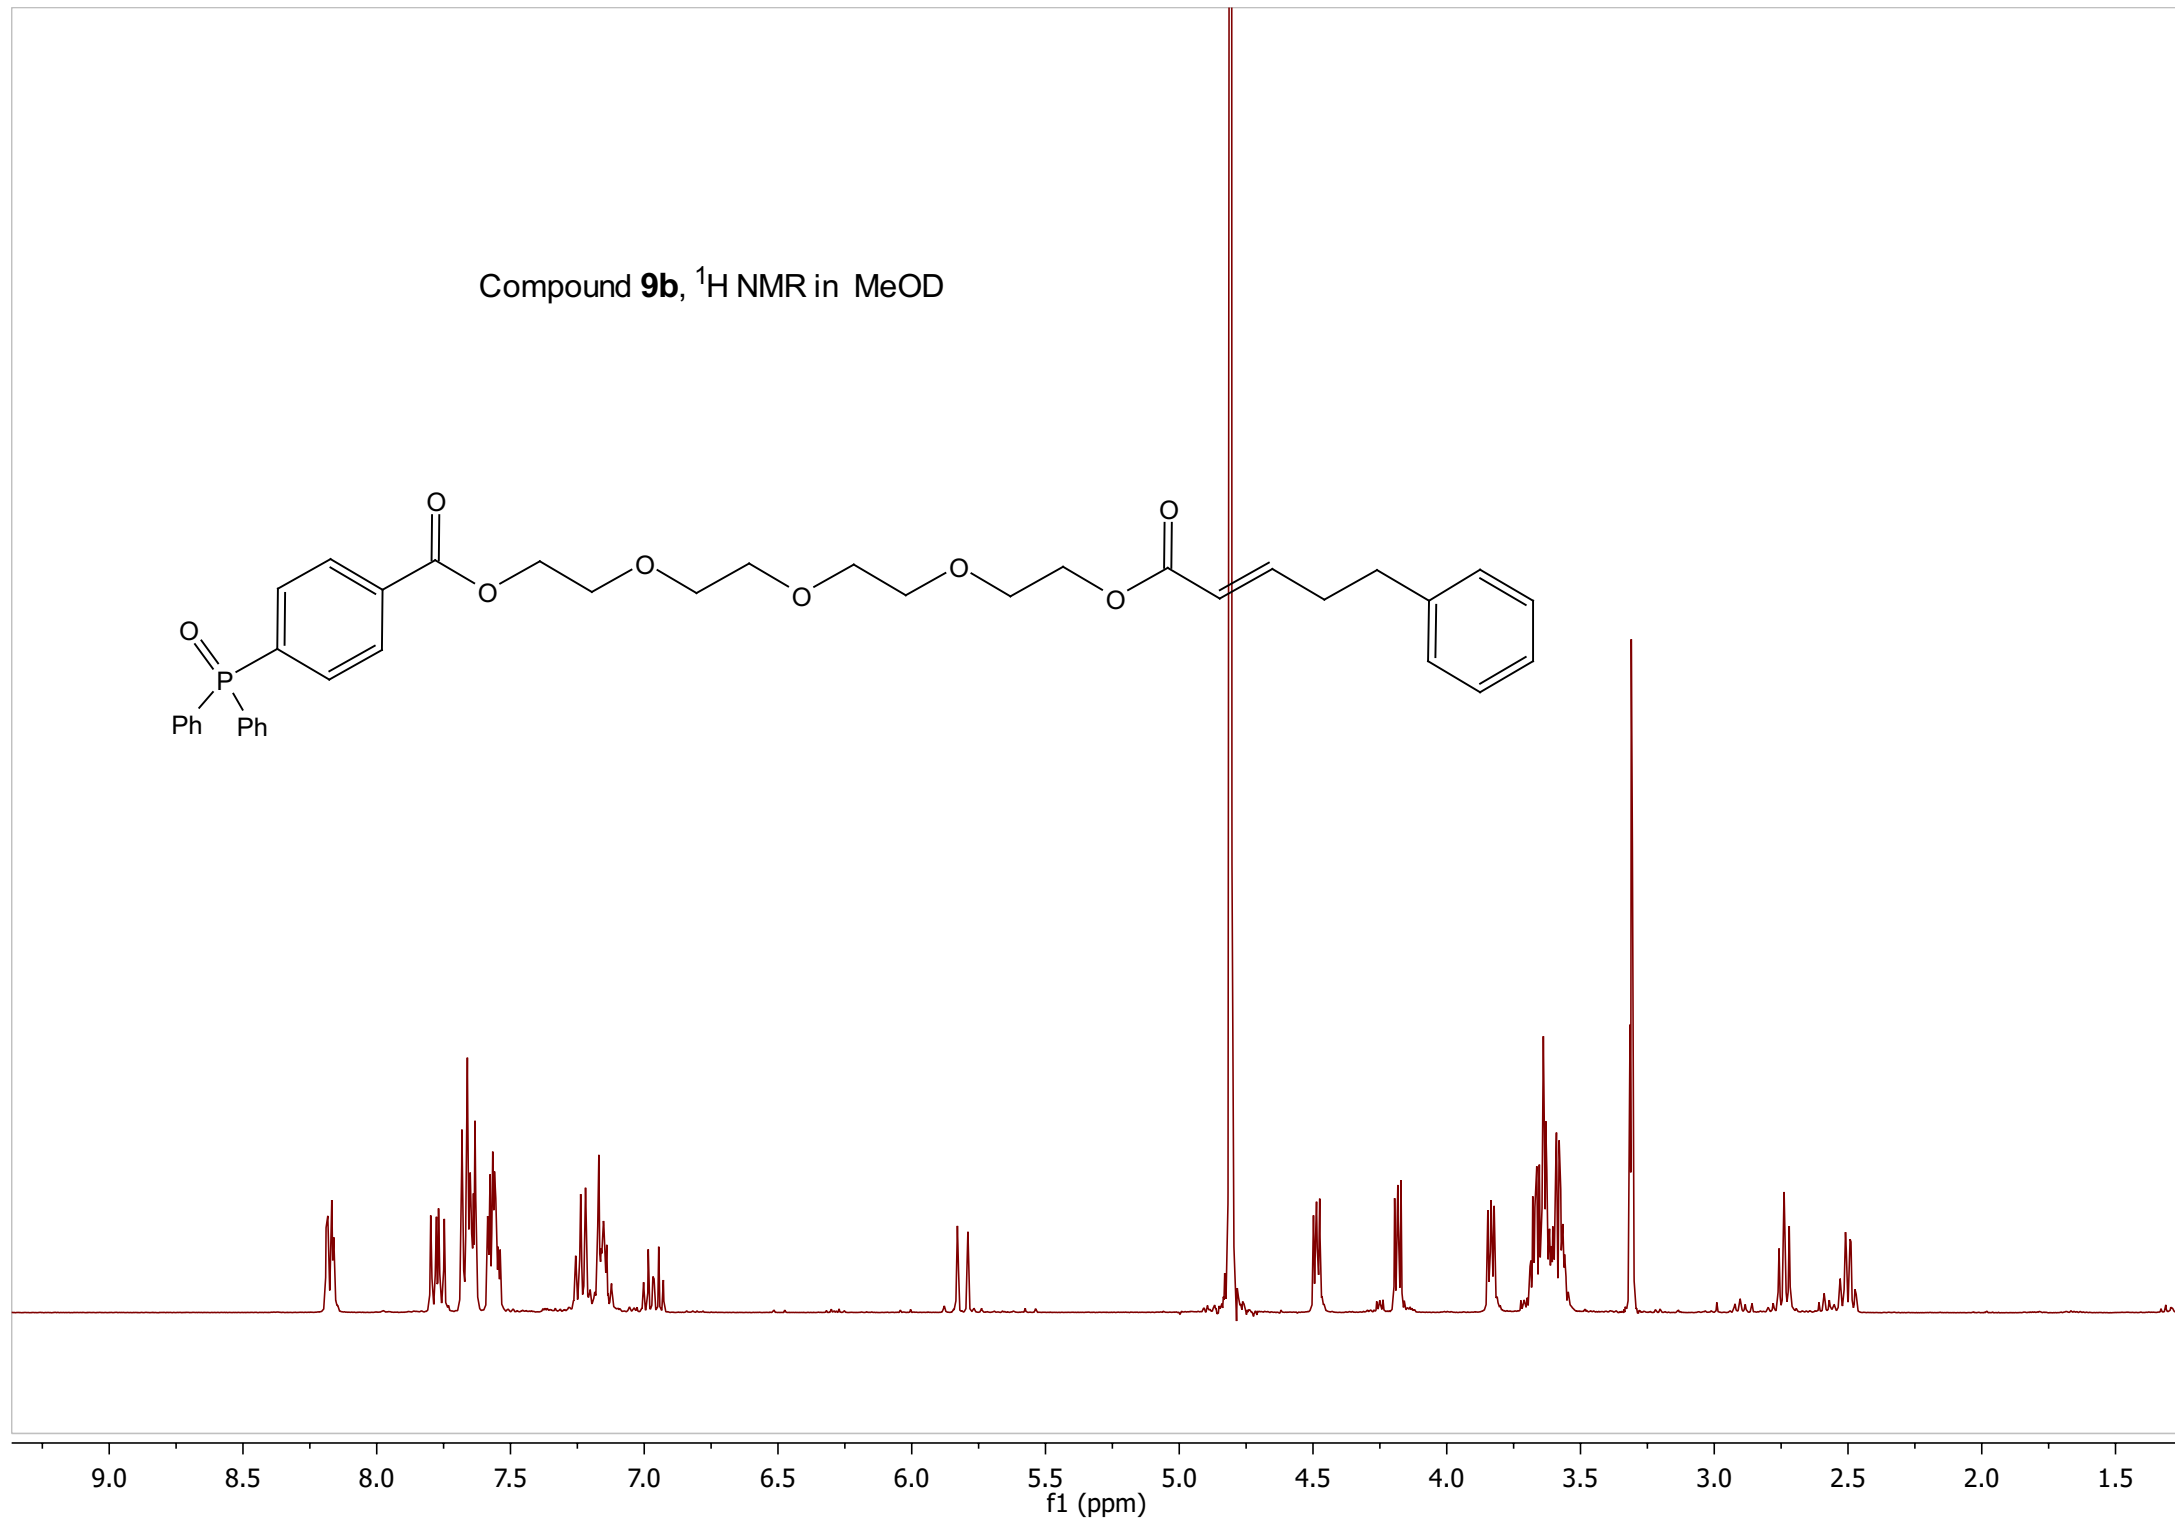

NS46N-P.11.fid

NS46N-BPP

C13CPD\_ICES Methanol-D4 {C:\Bruker\TopSpin3.2\data\May 2014} Jin 9

Compound **9b**,  $^{13}\text{C}$  NMR in MeOD

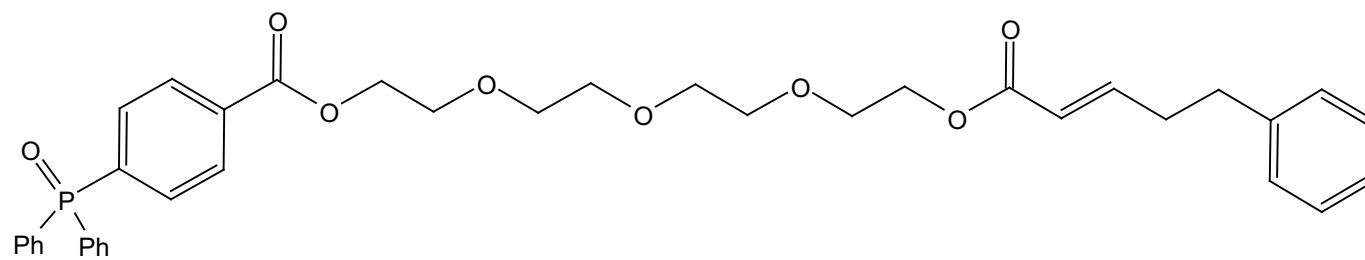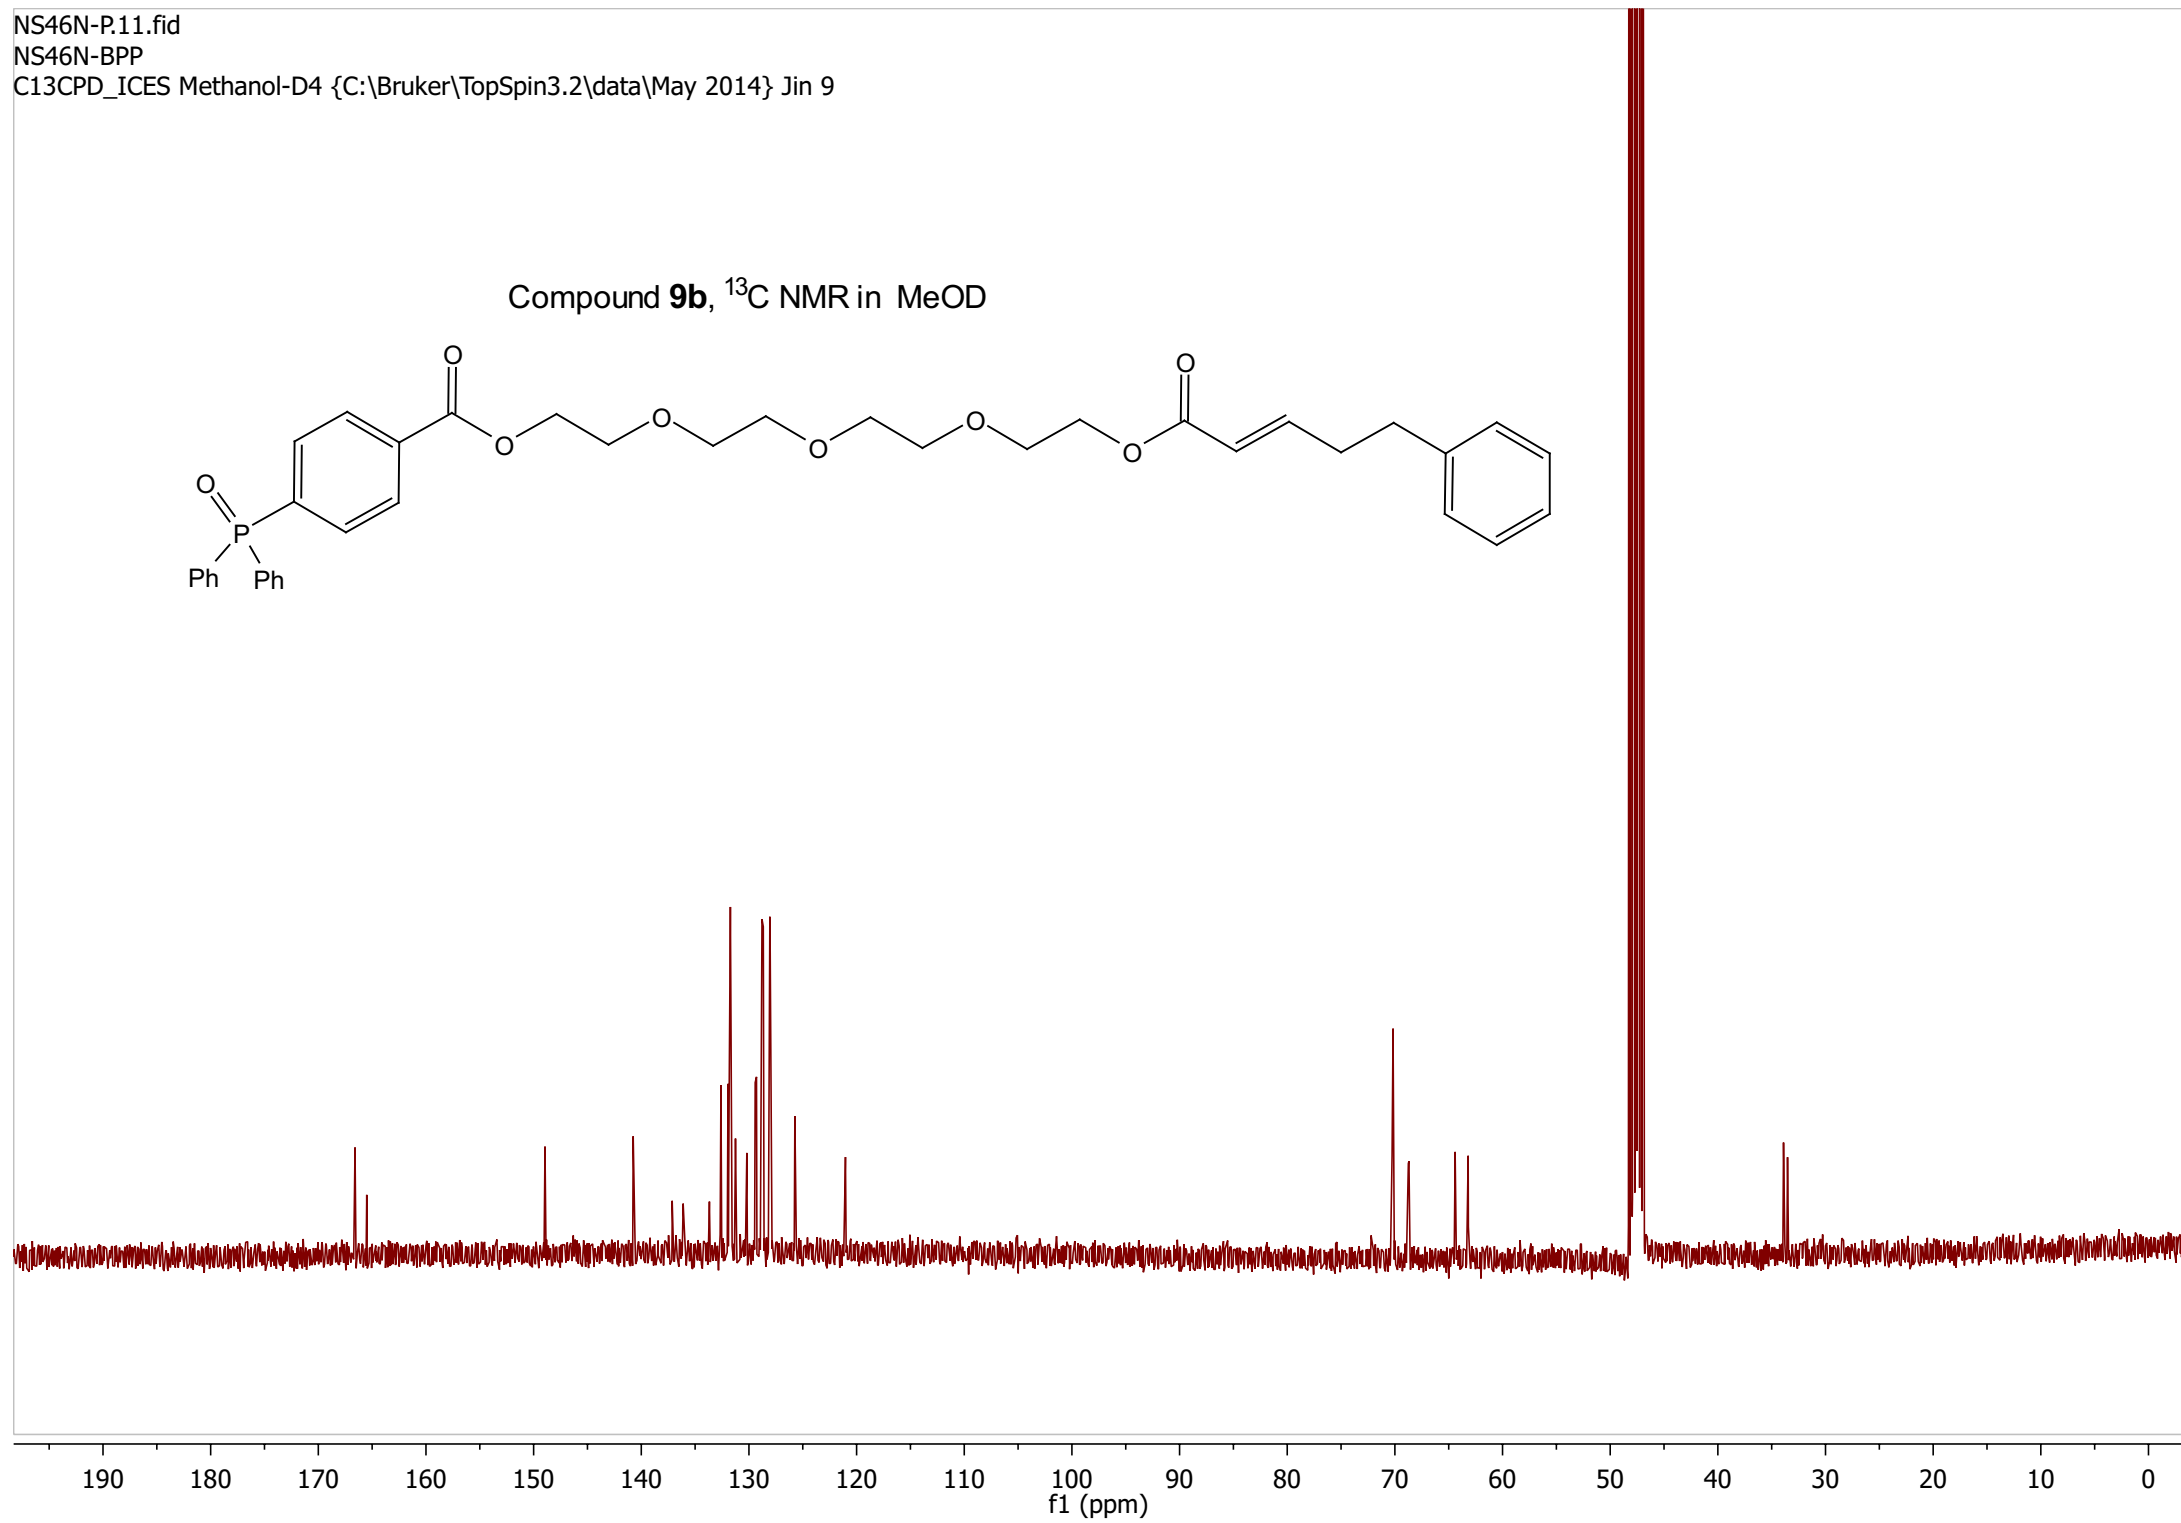

NS46N.2.fid  
NS46N-BPP  
bruker\_31P\_1D\_1Hdecoupled MeOD {C:\Bruker\TOPSPIN\data\CSL\CSL} ICES 19

— 31.25

Compound **9b**,  $^{31}\text{P}$  NMR in MeOD

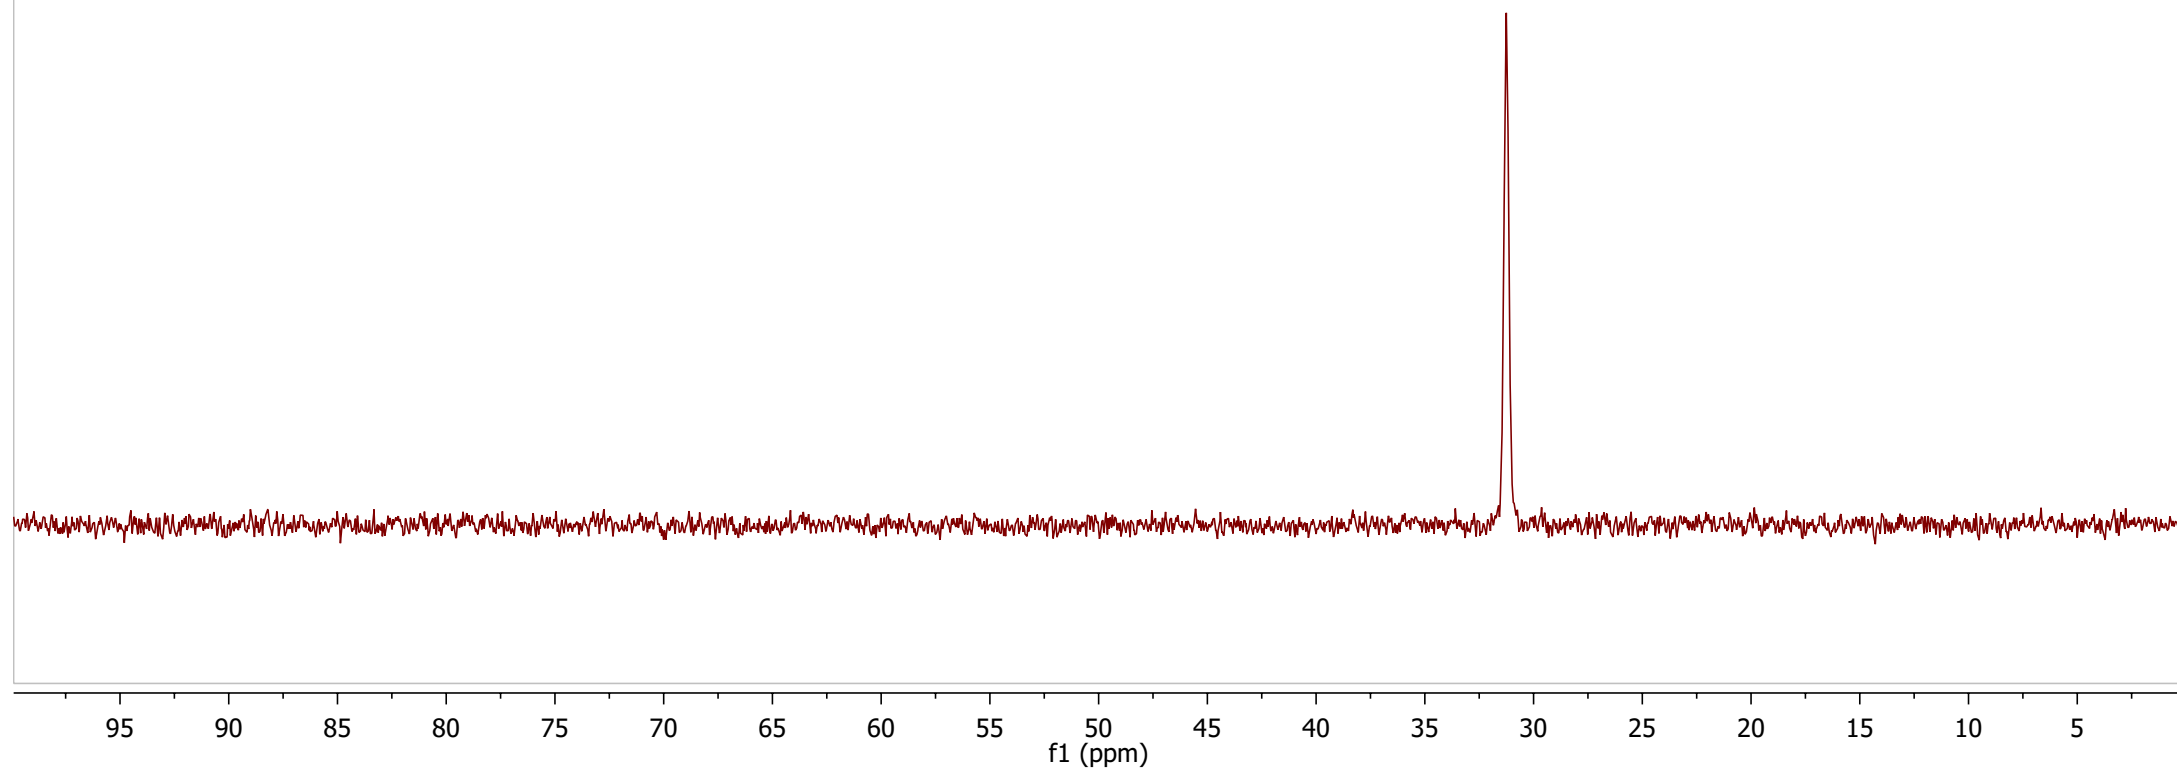

Compound **9c**,  $^1\text{H}$  NMR in MeOD

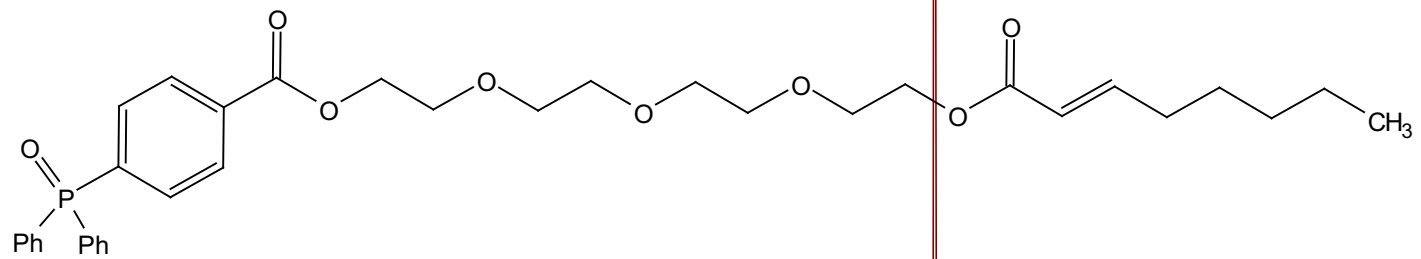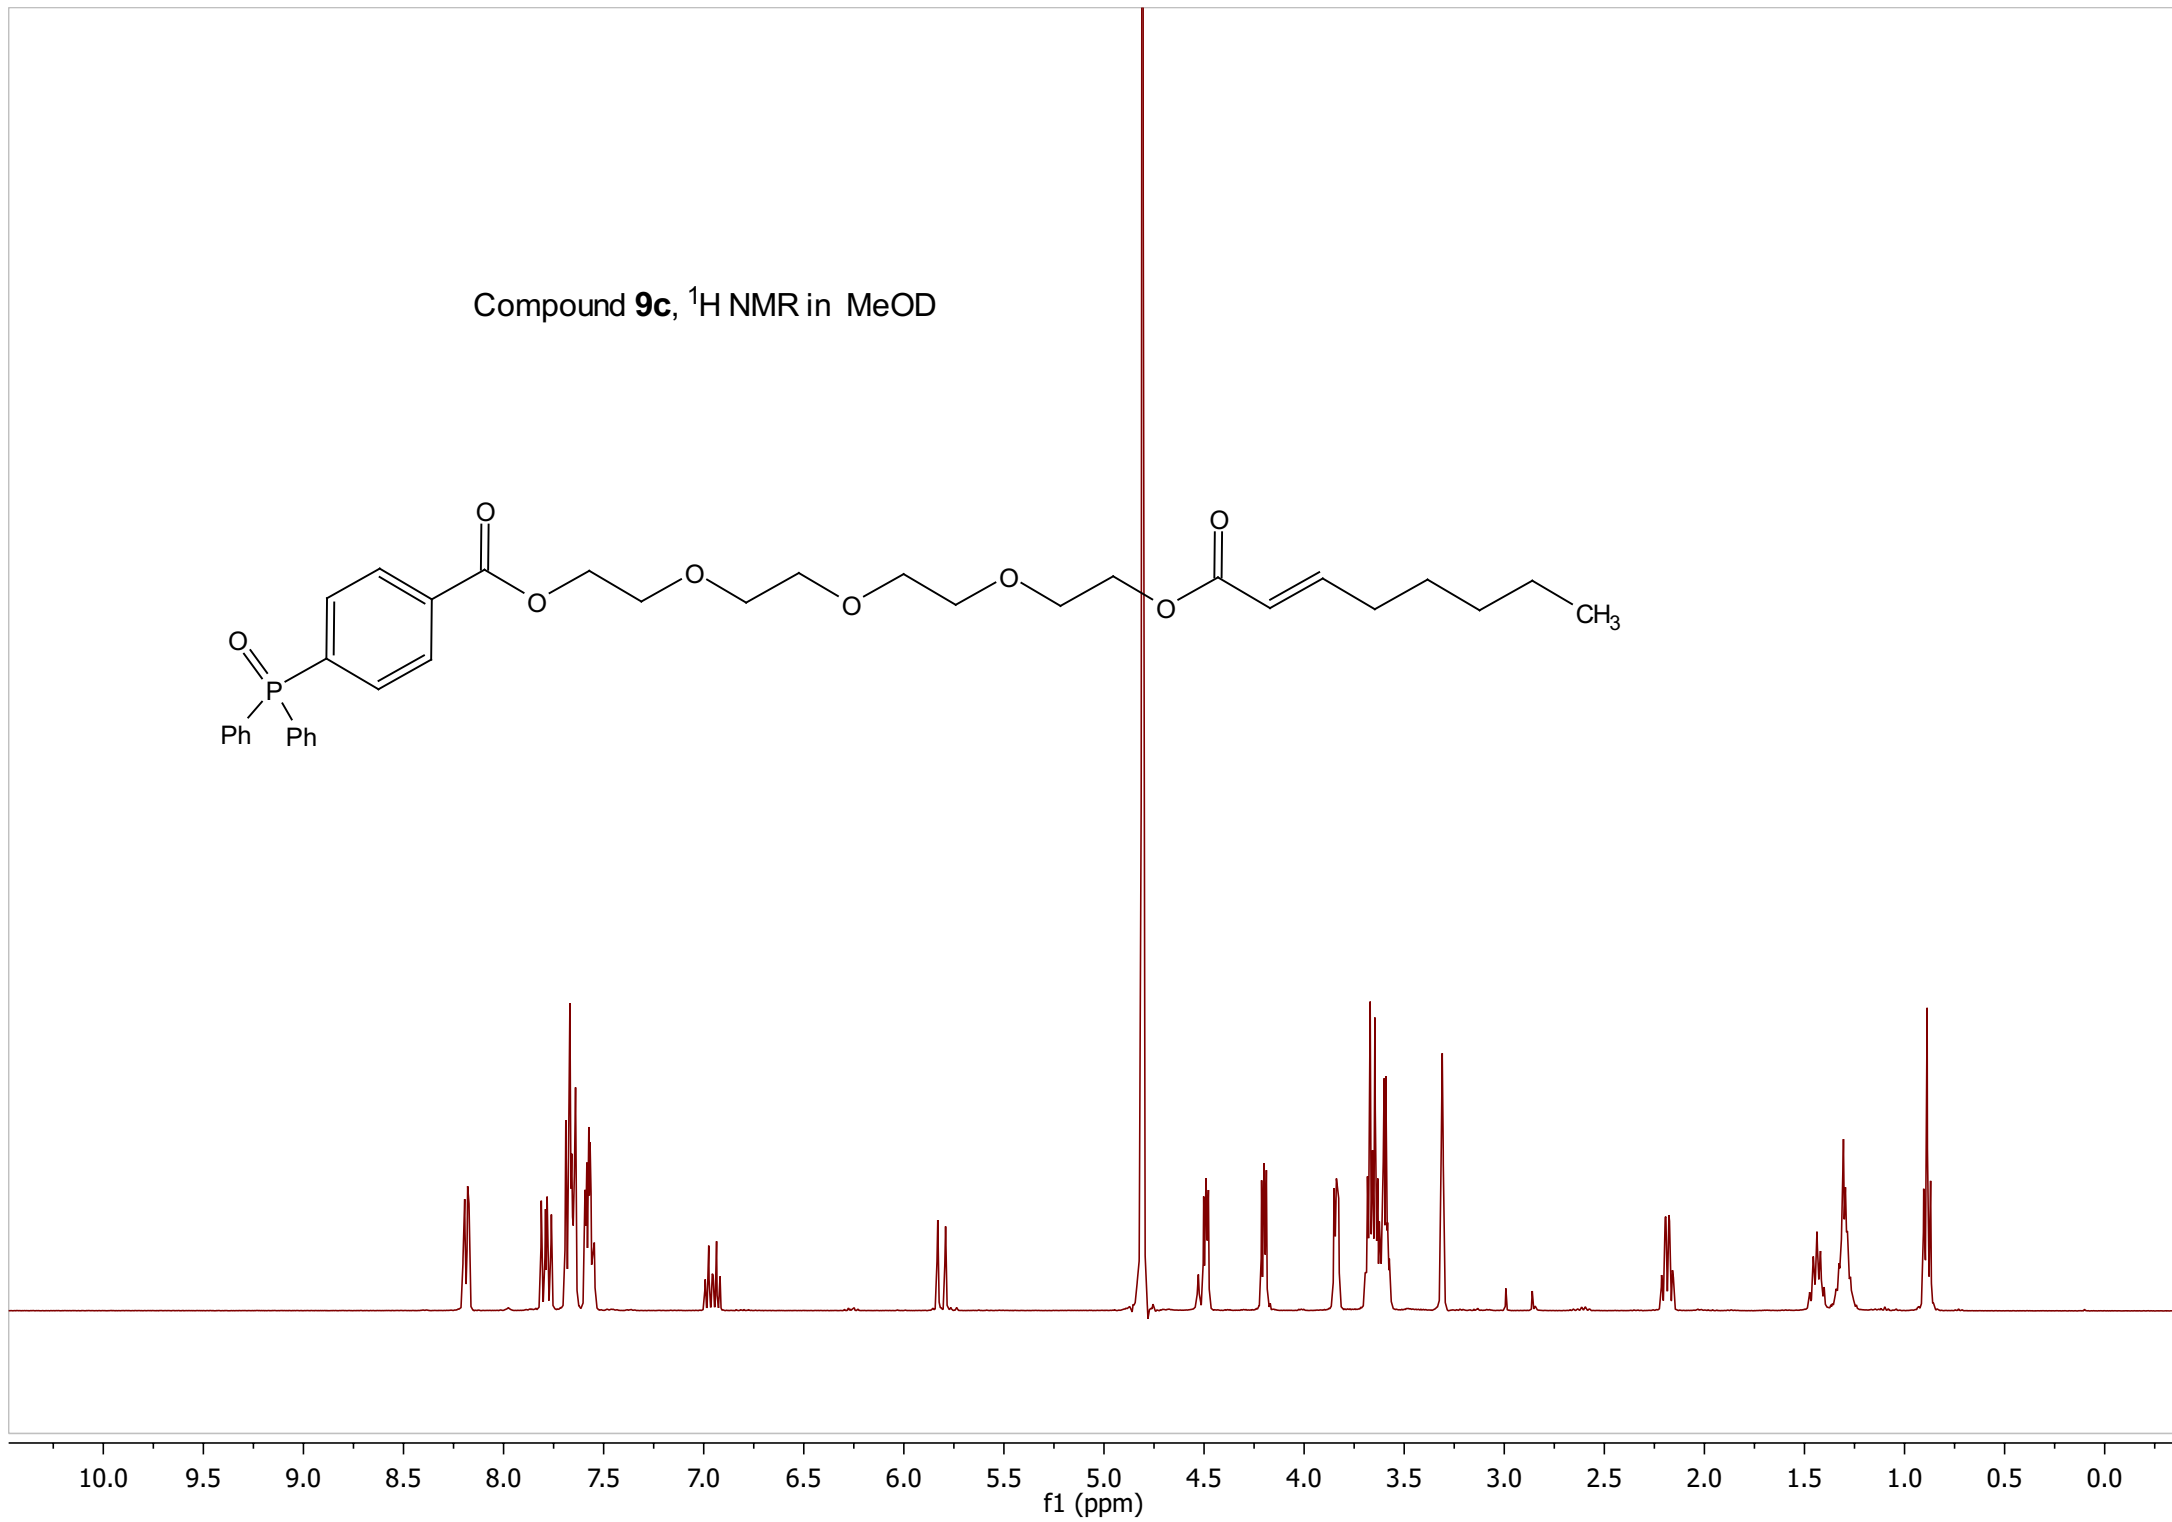

Compound **9c**,  $^{13}\text{C}$  NMR in MeOD

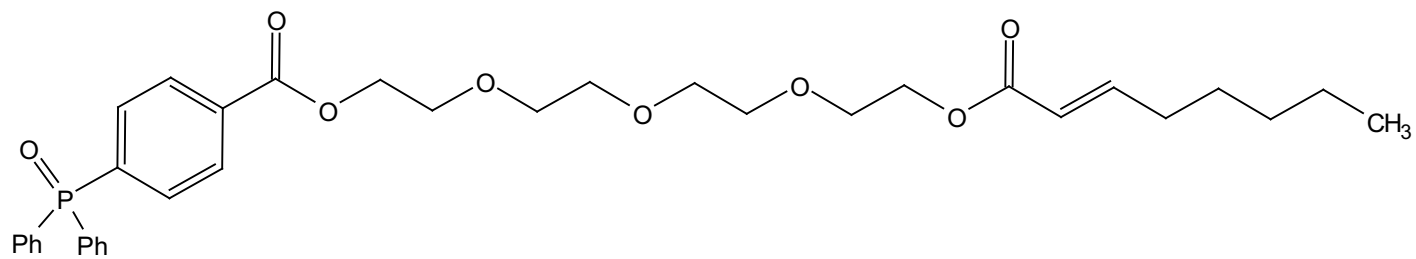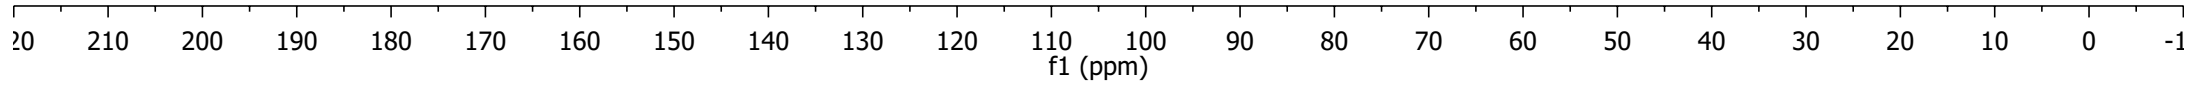



NS46N.5.fid  
NS46N-EPP  
bruker\_31P\_1D\_1Hdecoupled MeOD {C:\Bruker\TOPSPIN\data\CSL\CSL} ICES 22

— 31.22

Compound **9c**,  $^{31}\text{P}$  NMR in MeOD

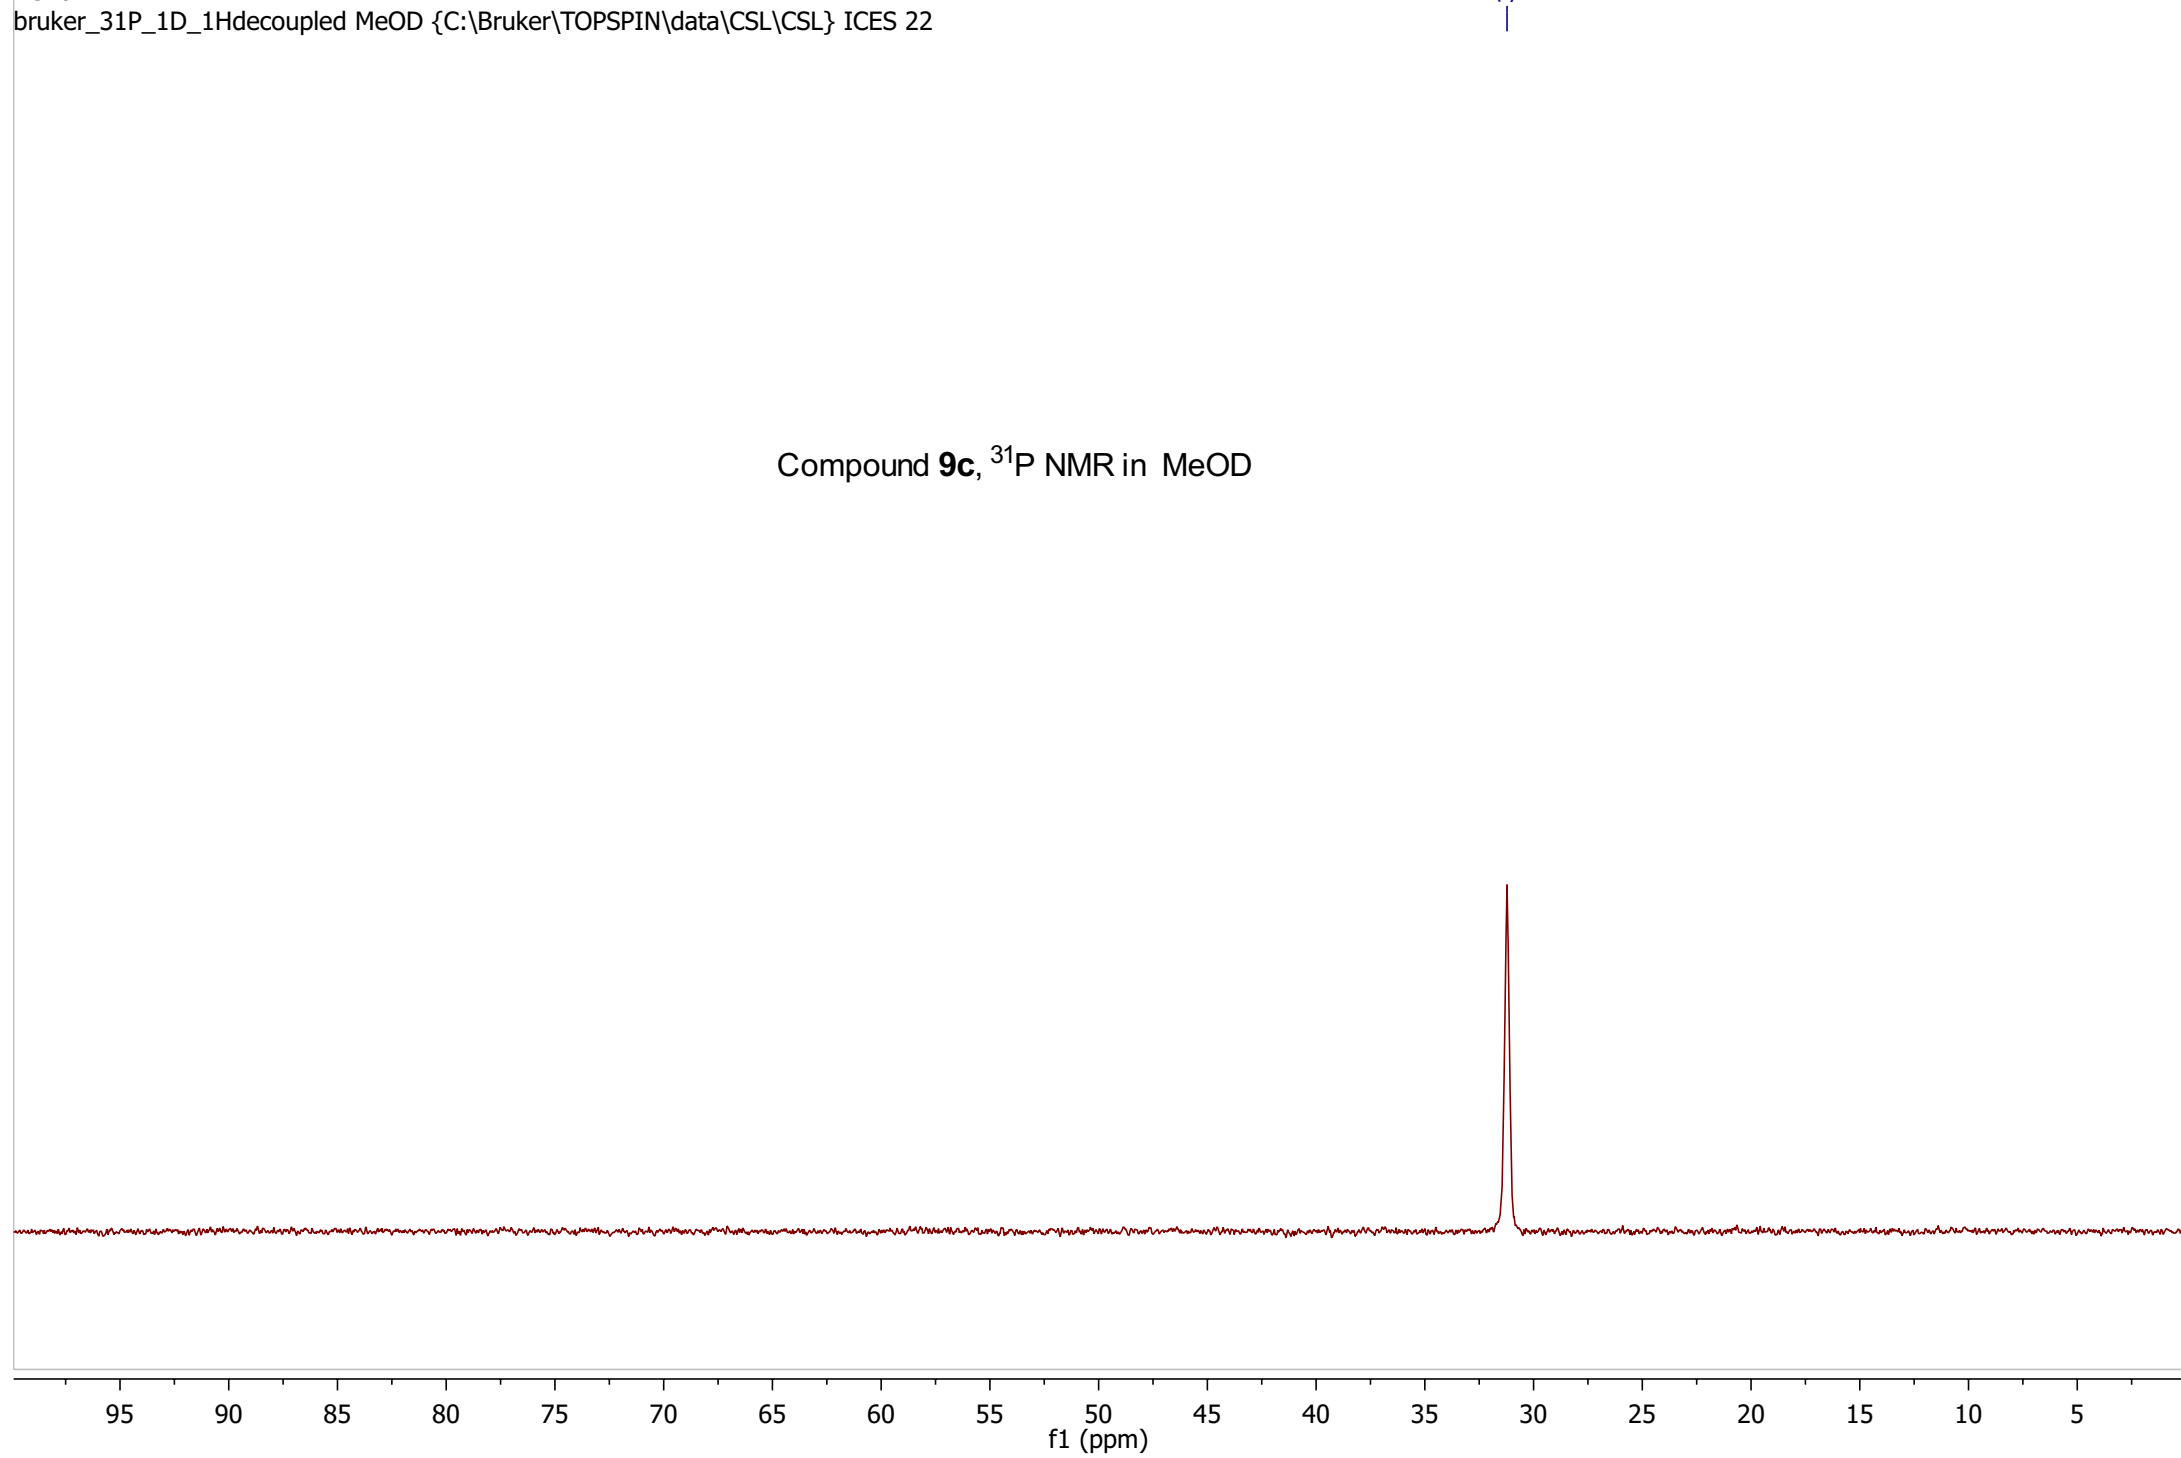



Compound **9d**, <sup>13</sup>C NMR in MeOD

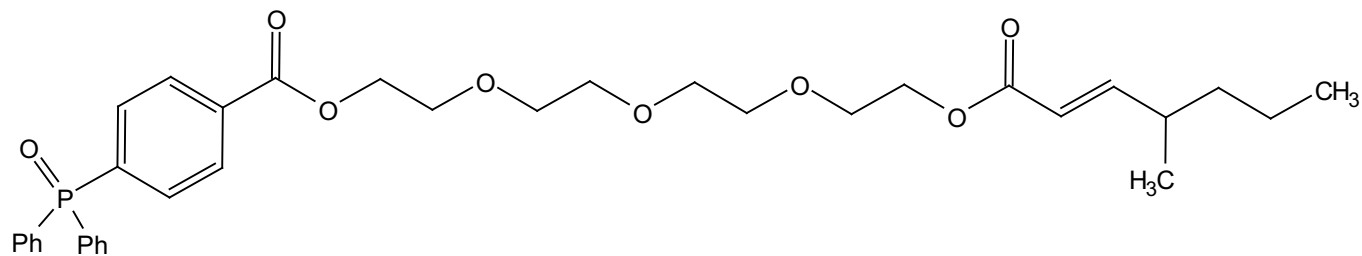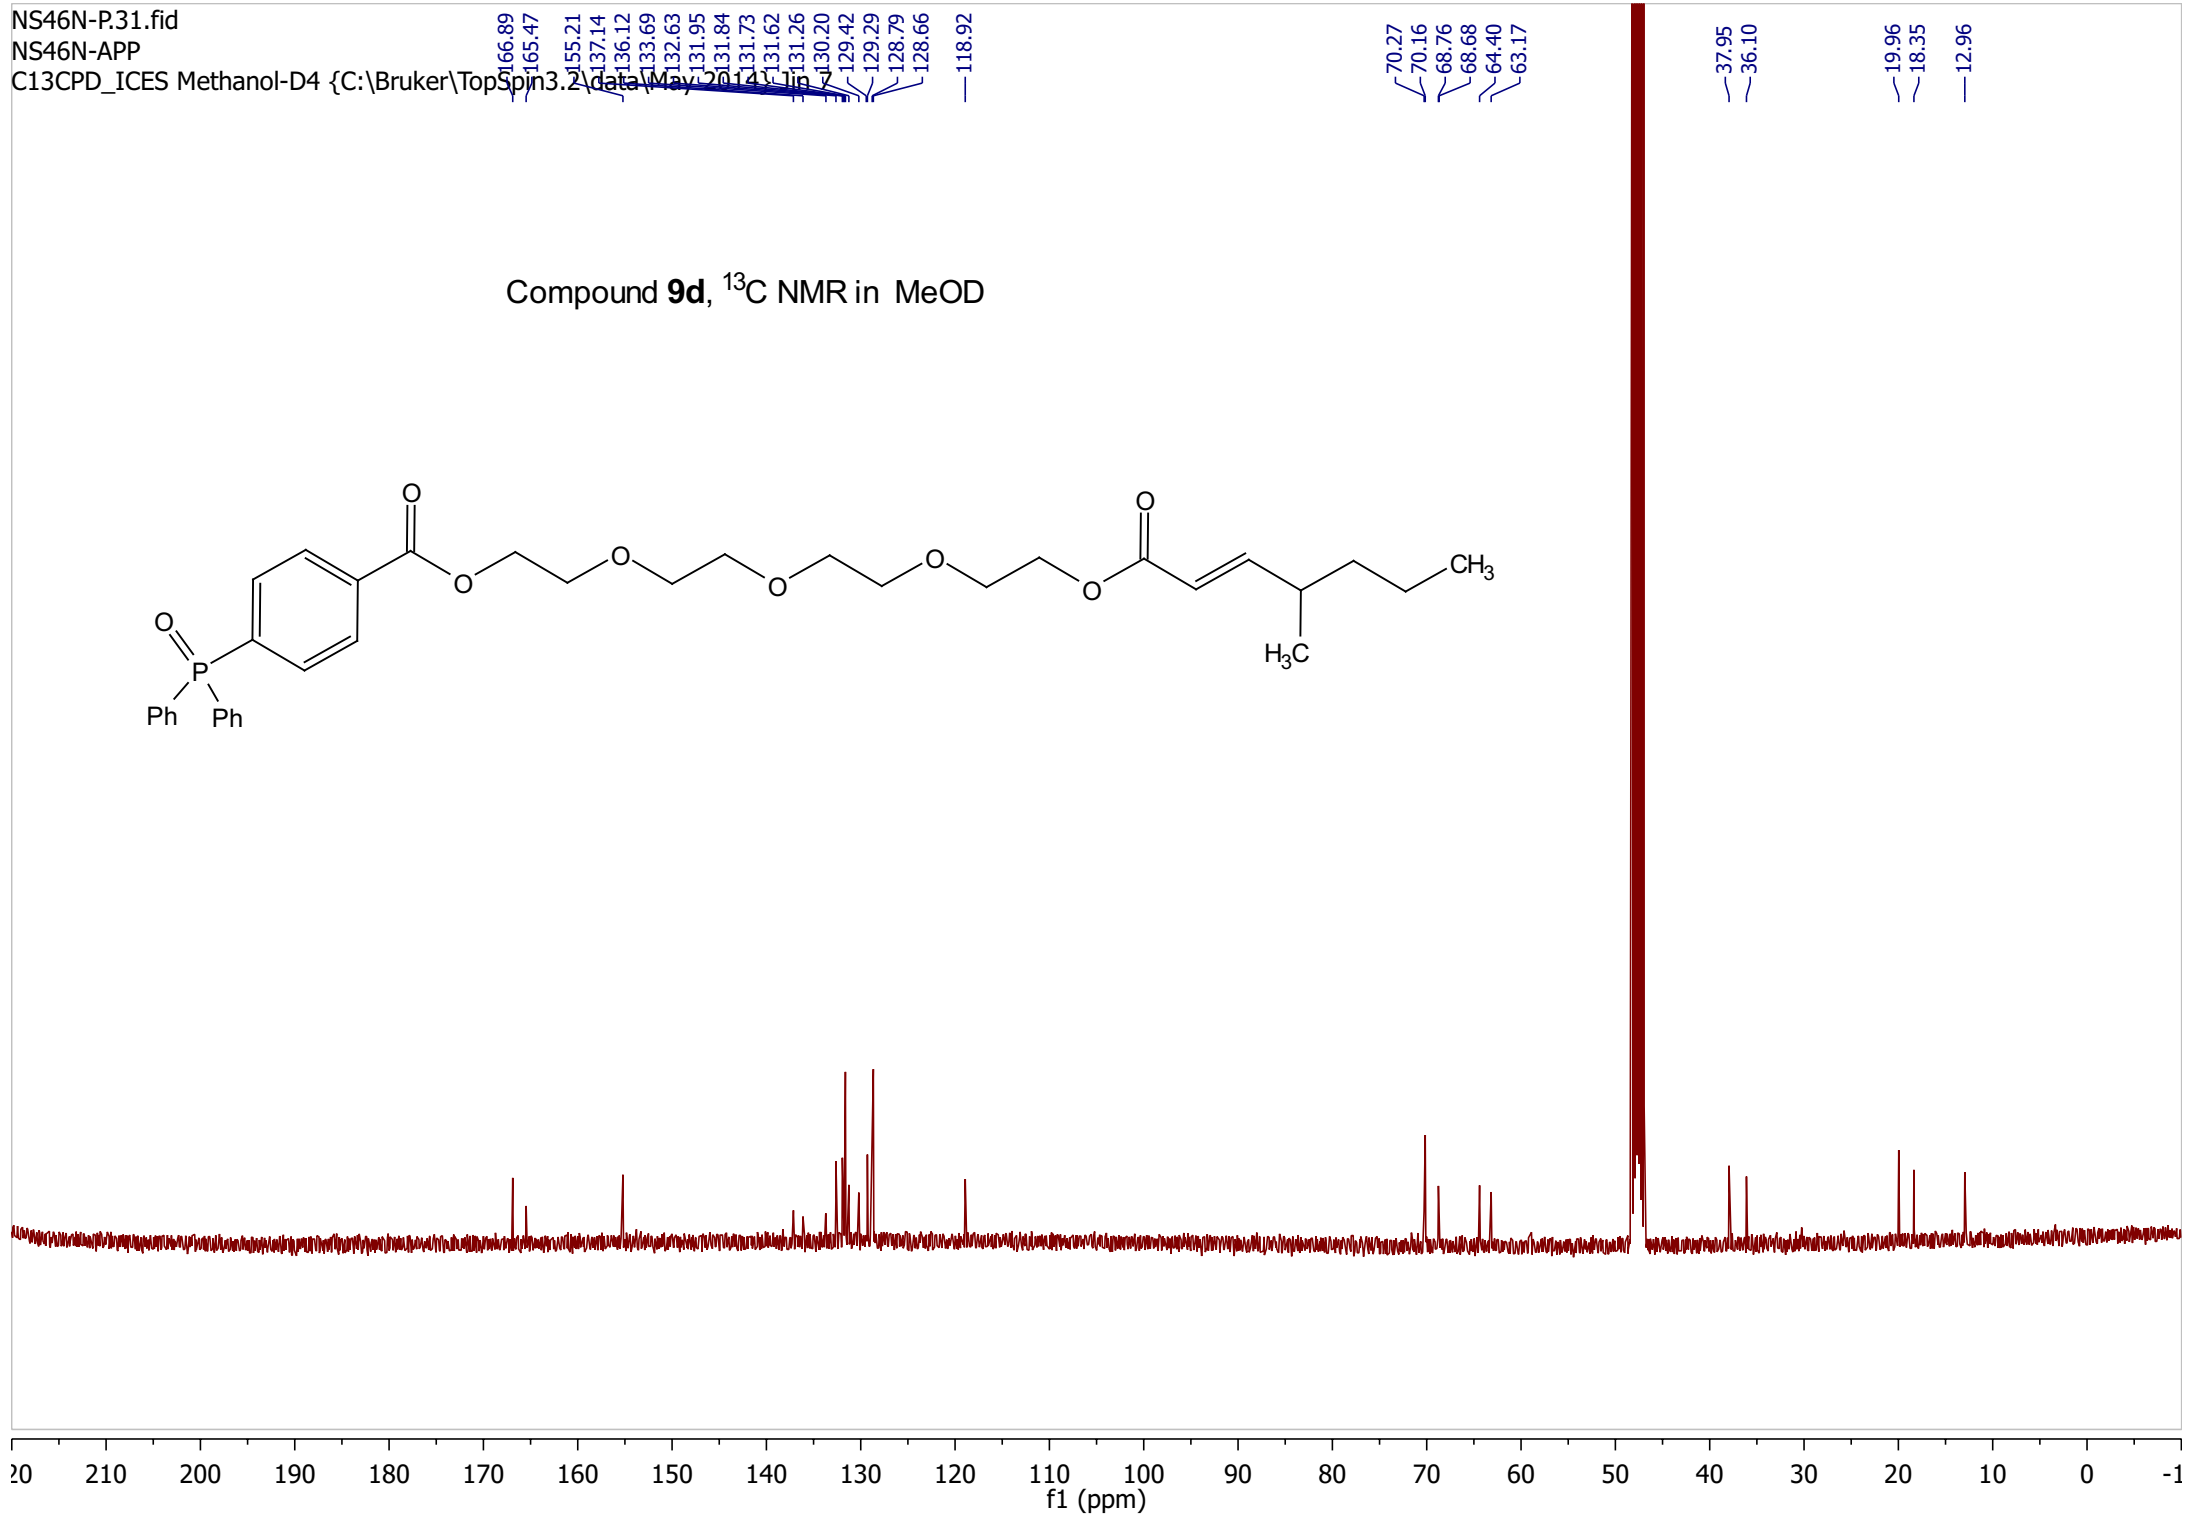

NS46N.1.fid  
NS46N-APP  
bruker\_31P\_1D\_1Hdecoupled MeOD {C:\Bruker\TOPSPIN\data\CSL\CSL} ICES 18

—31.25

Compound **9d**,  $^{31}\text{P}$  NMR in MeOD

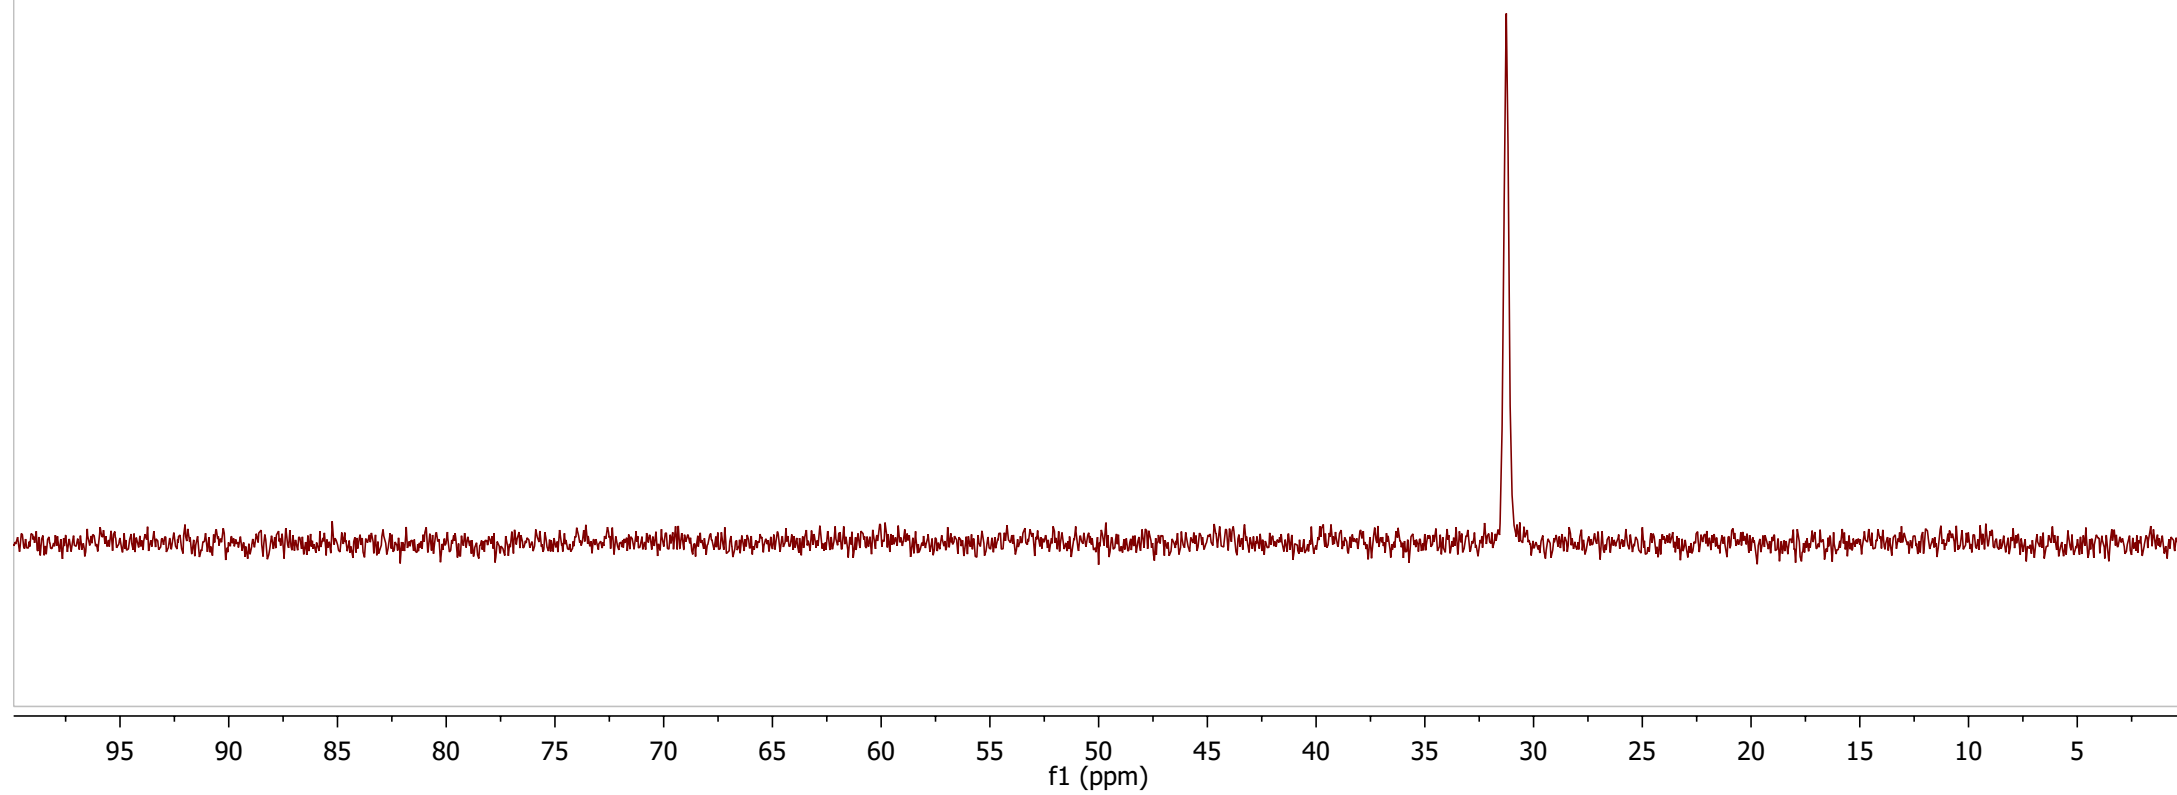

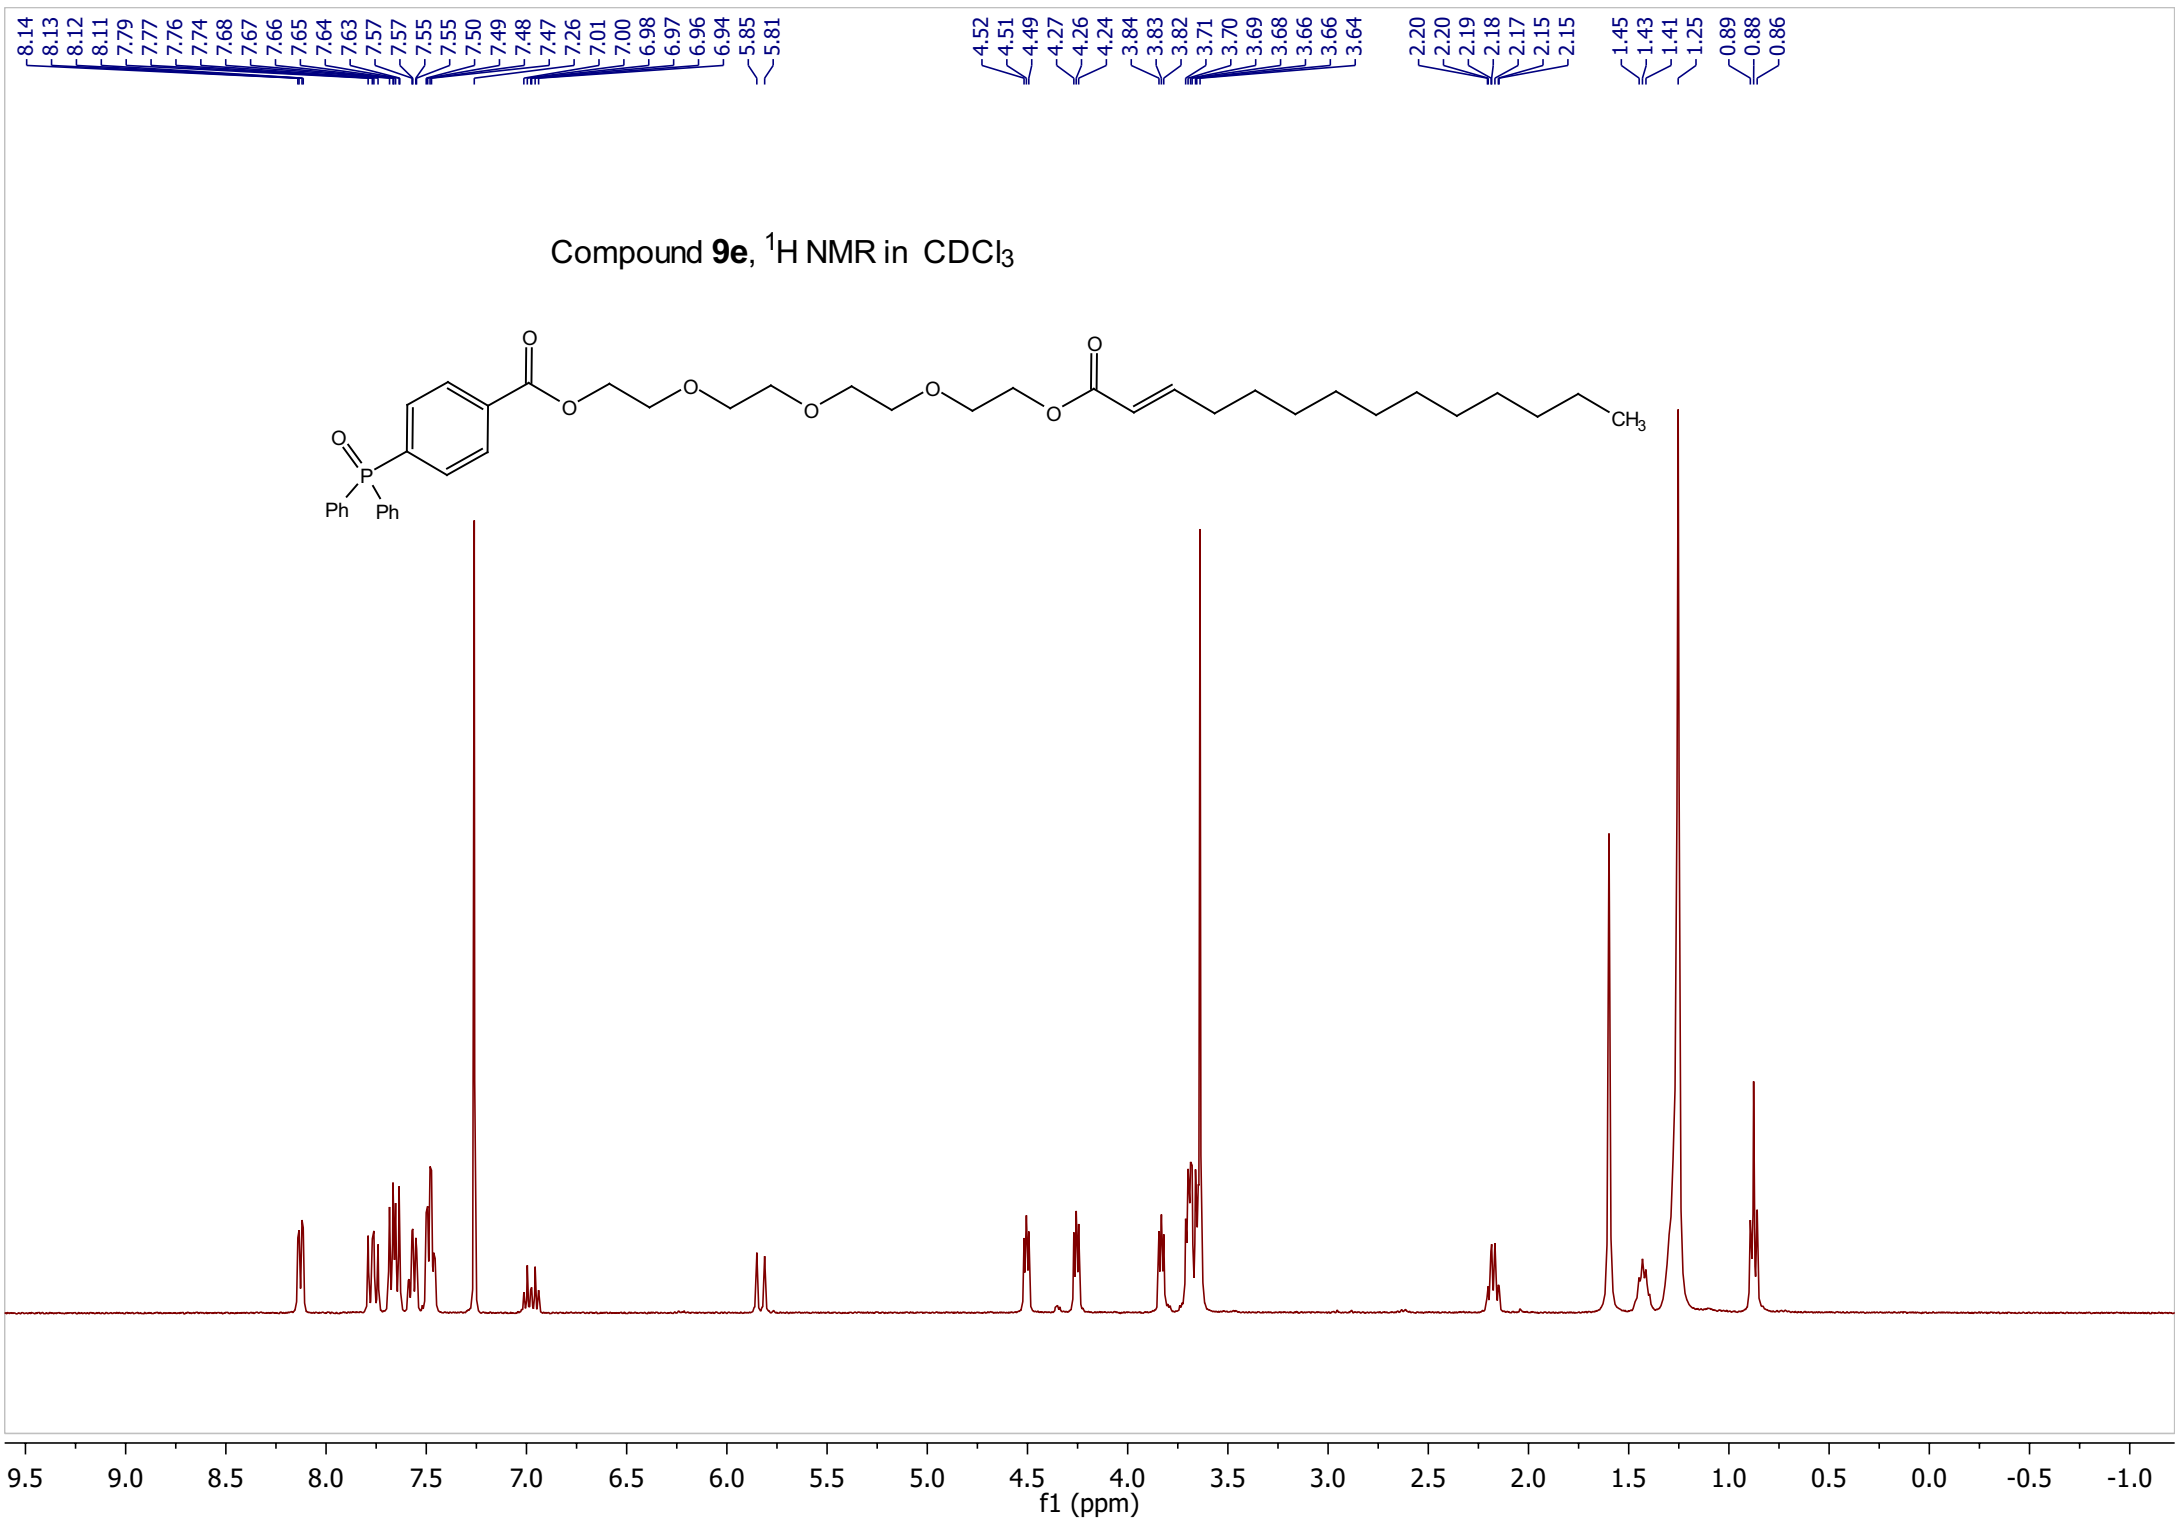

Compound **9e**,  $^{13}\text{C}$  NMR in  $\text{CDCl}_3$

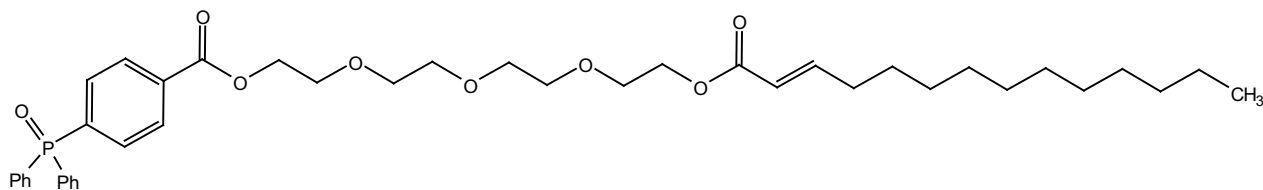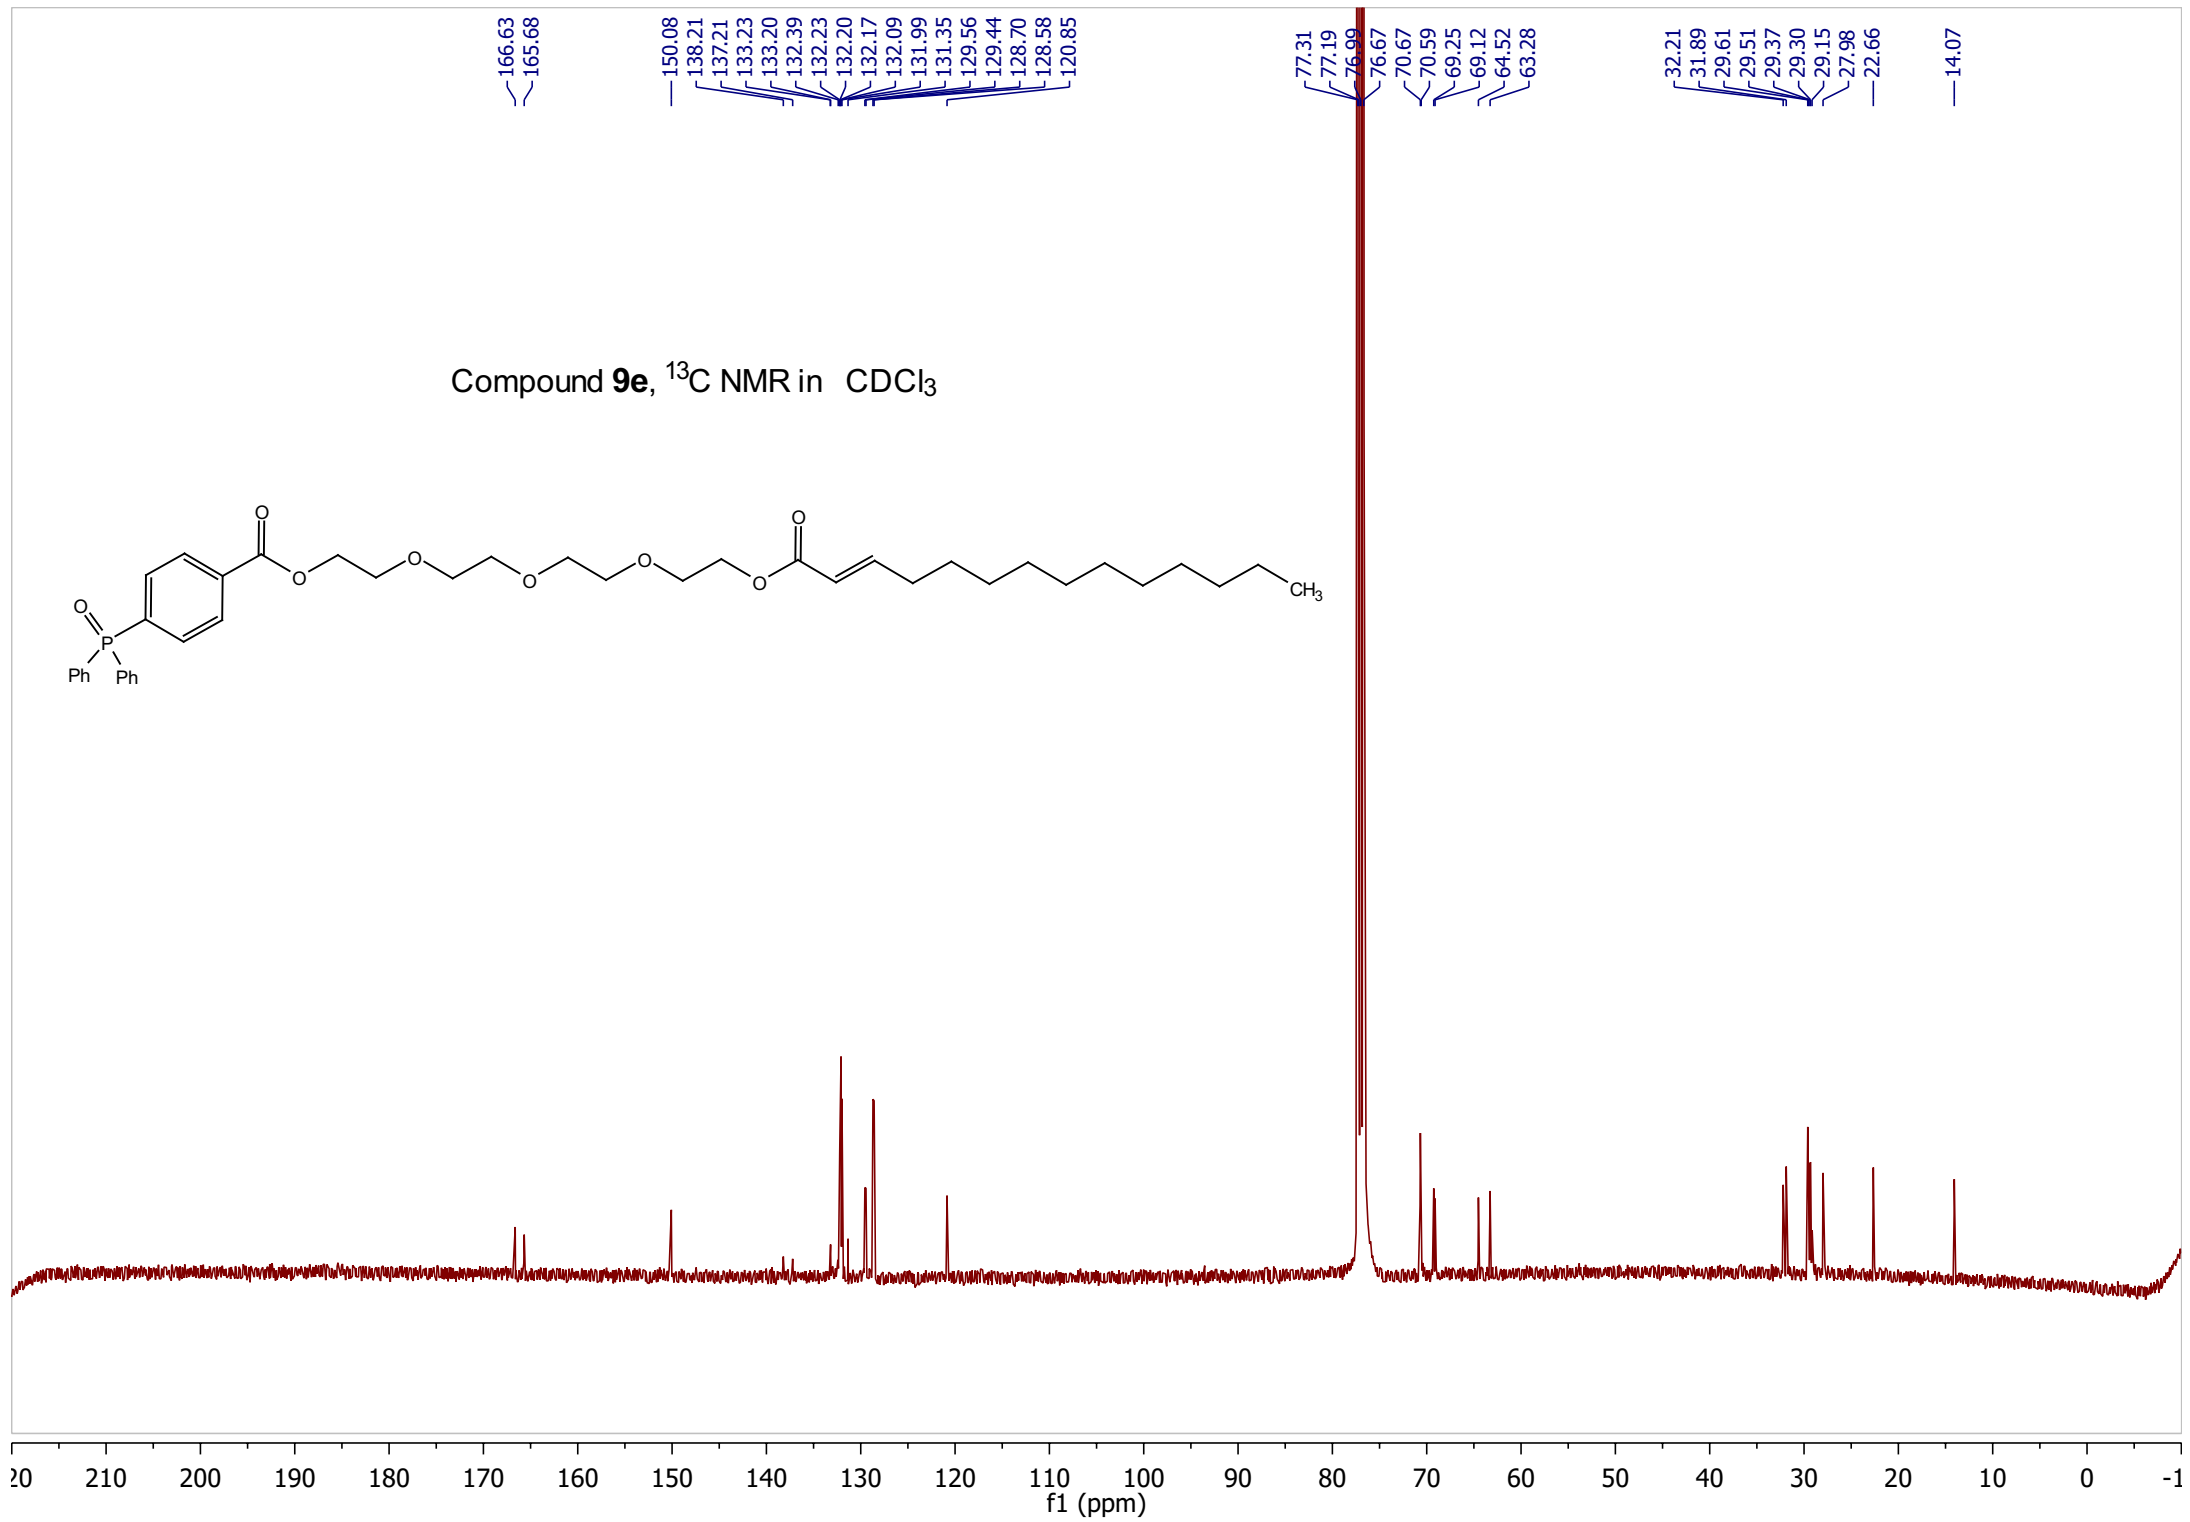

168.08  
166.81  
151.42  
138.53  
137.52  
135.10  
135.08  
134.00  
133.98  
133.33  
133.23  
133.12  
133.02  
132.68  
131.62  
130.80  
130.68  
130.17  
130.05  
121.91

71.68  
71.61  
71.58  
70.14  
70.07  
65.79  
64.53

49.43  
49.21  
49.00  
48.79  
48.57

33.15  
33.04  
30.71  
30.63  
30.46  
30.44  
30.23  
29.15  
23.71

14.43

### Compound **9e**, $^{13}\text{C}$ NMR in MeOD

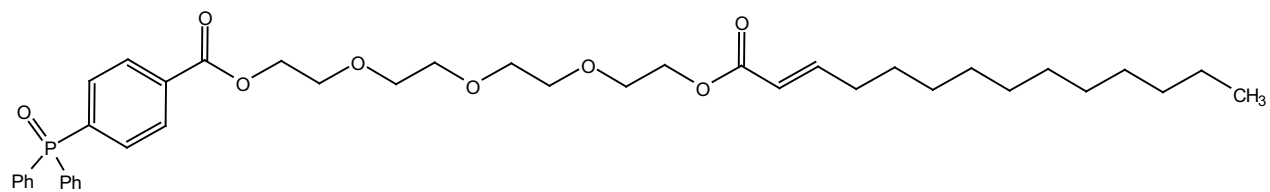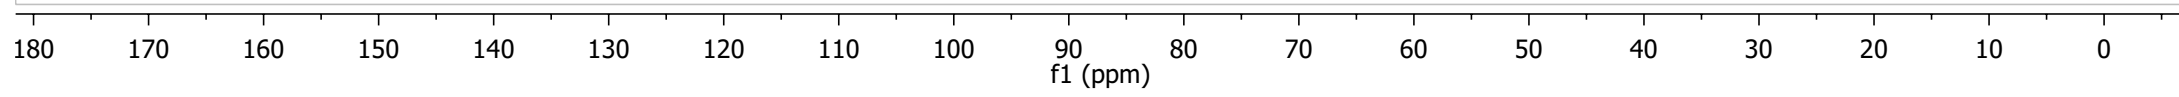

—28.33

Compound **9e**,  $^{31}\text{P}$  NMR in  $\text{CDCl}_3$

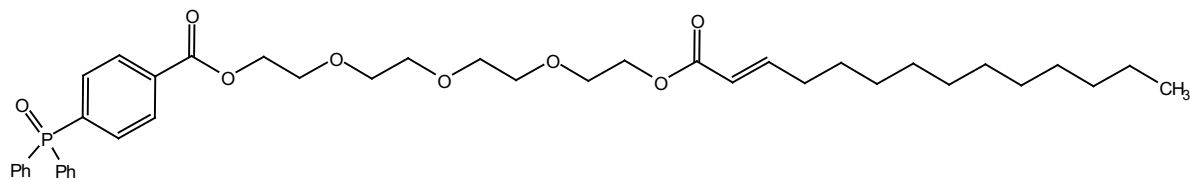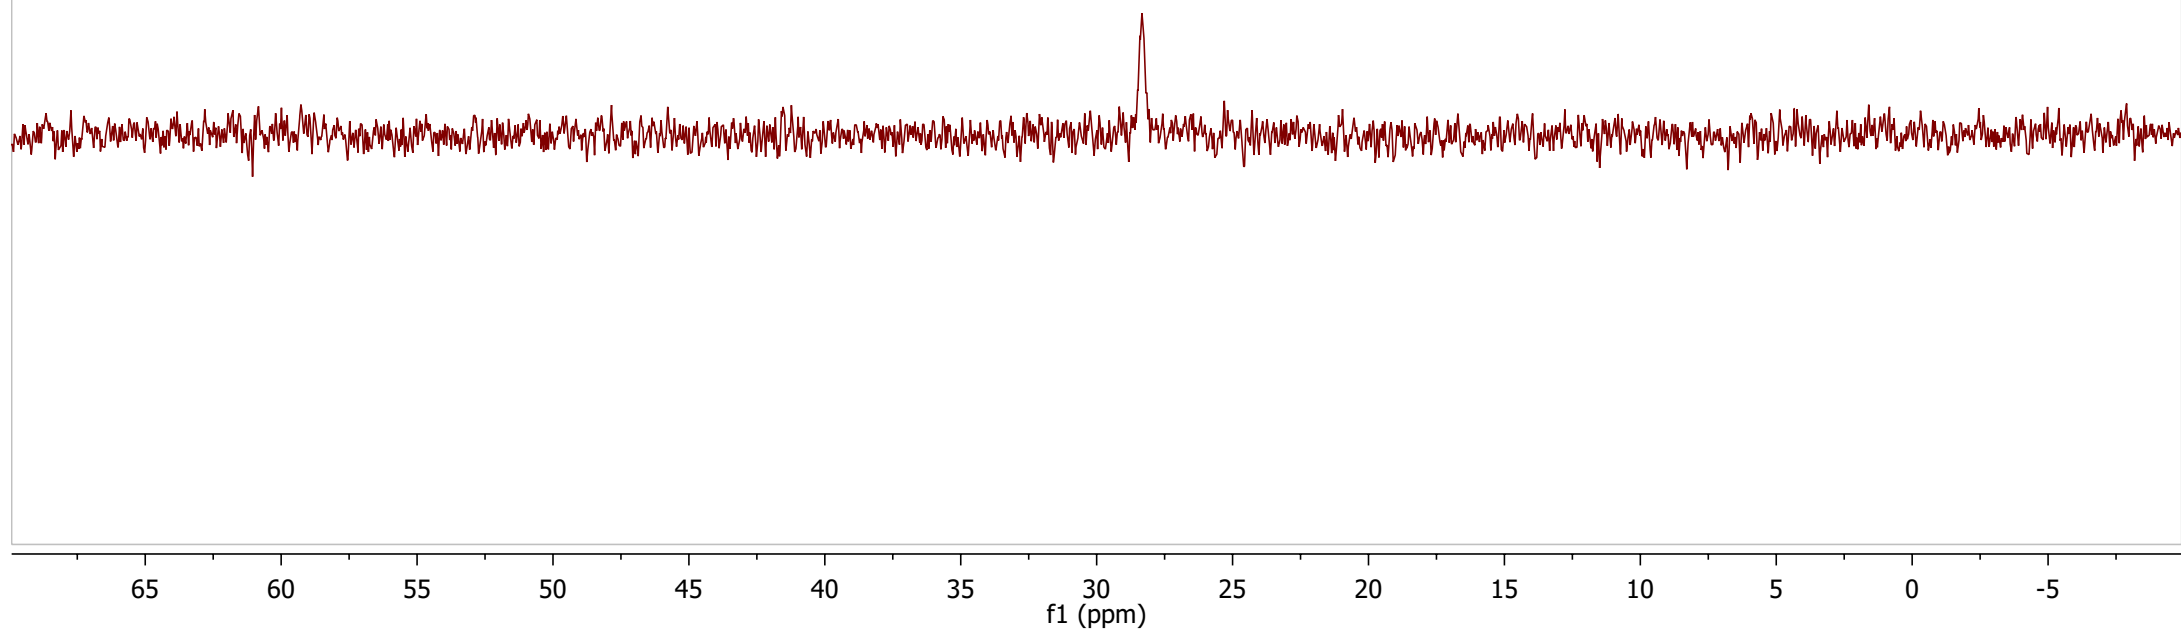



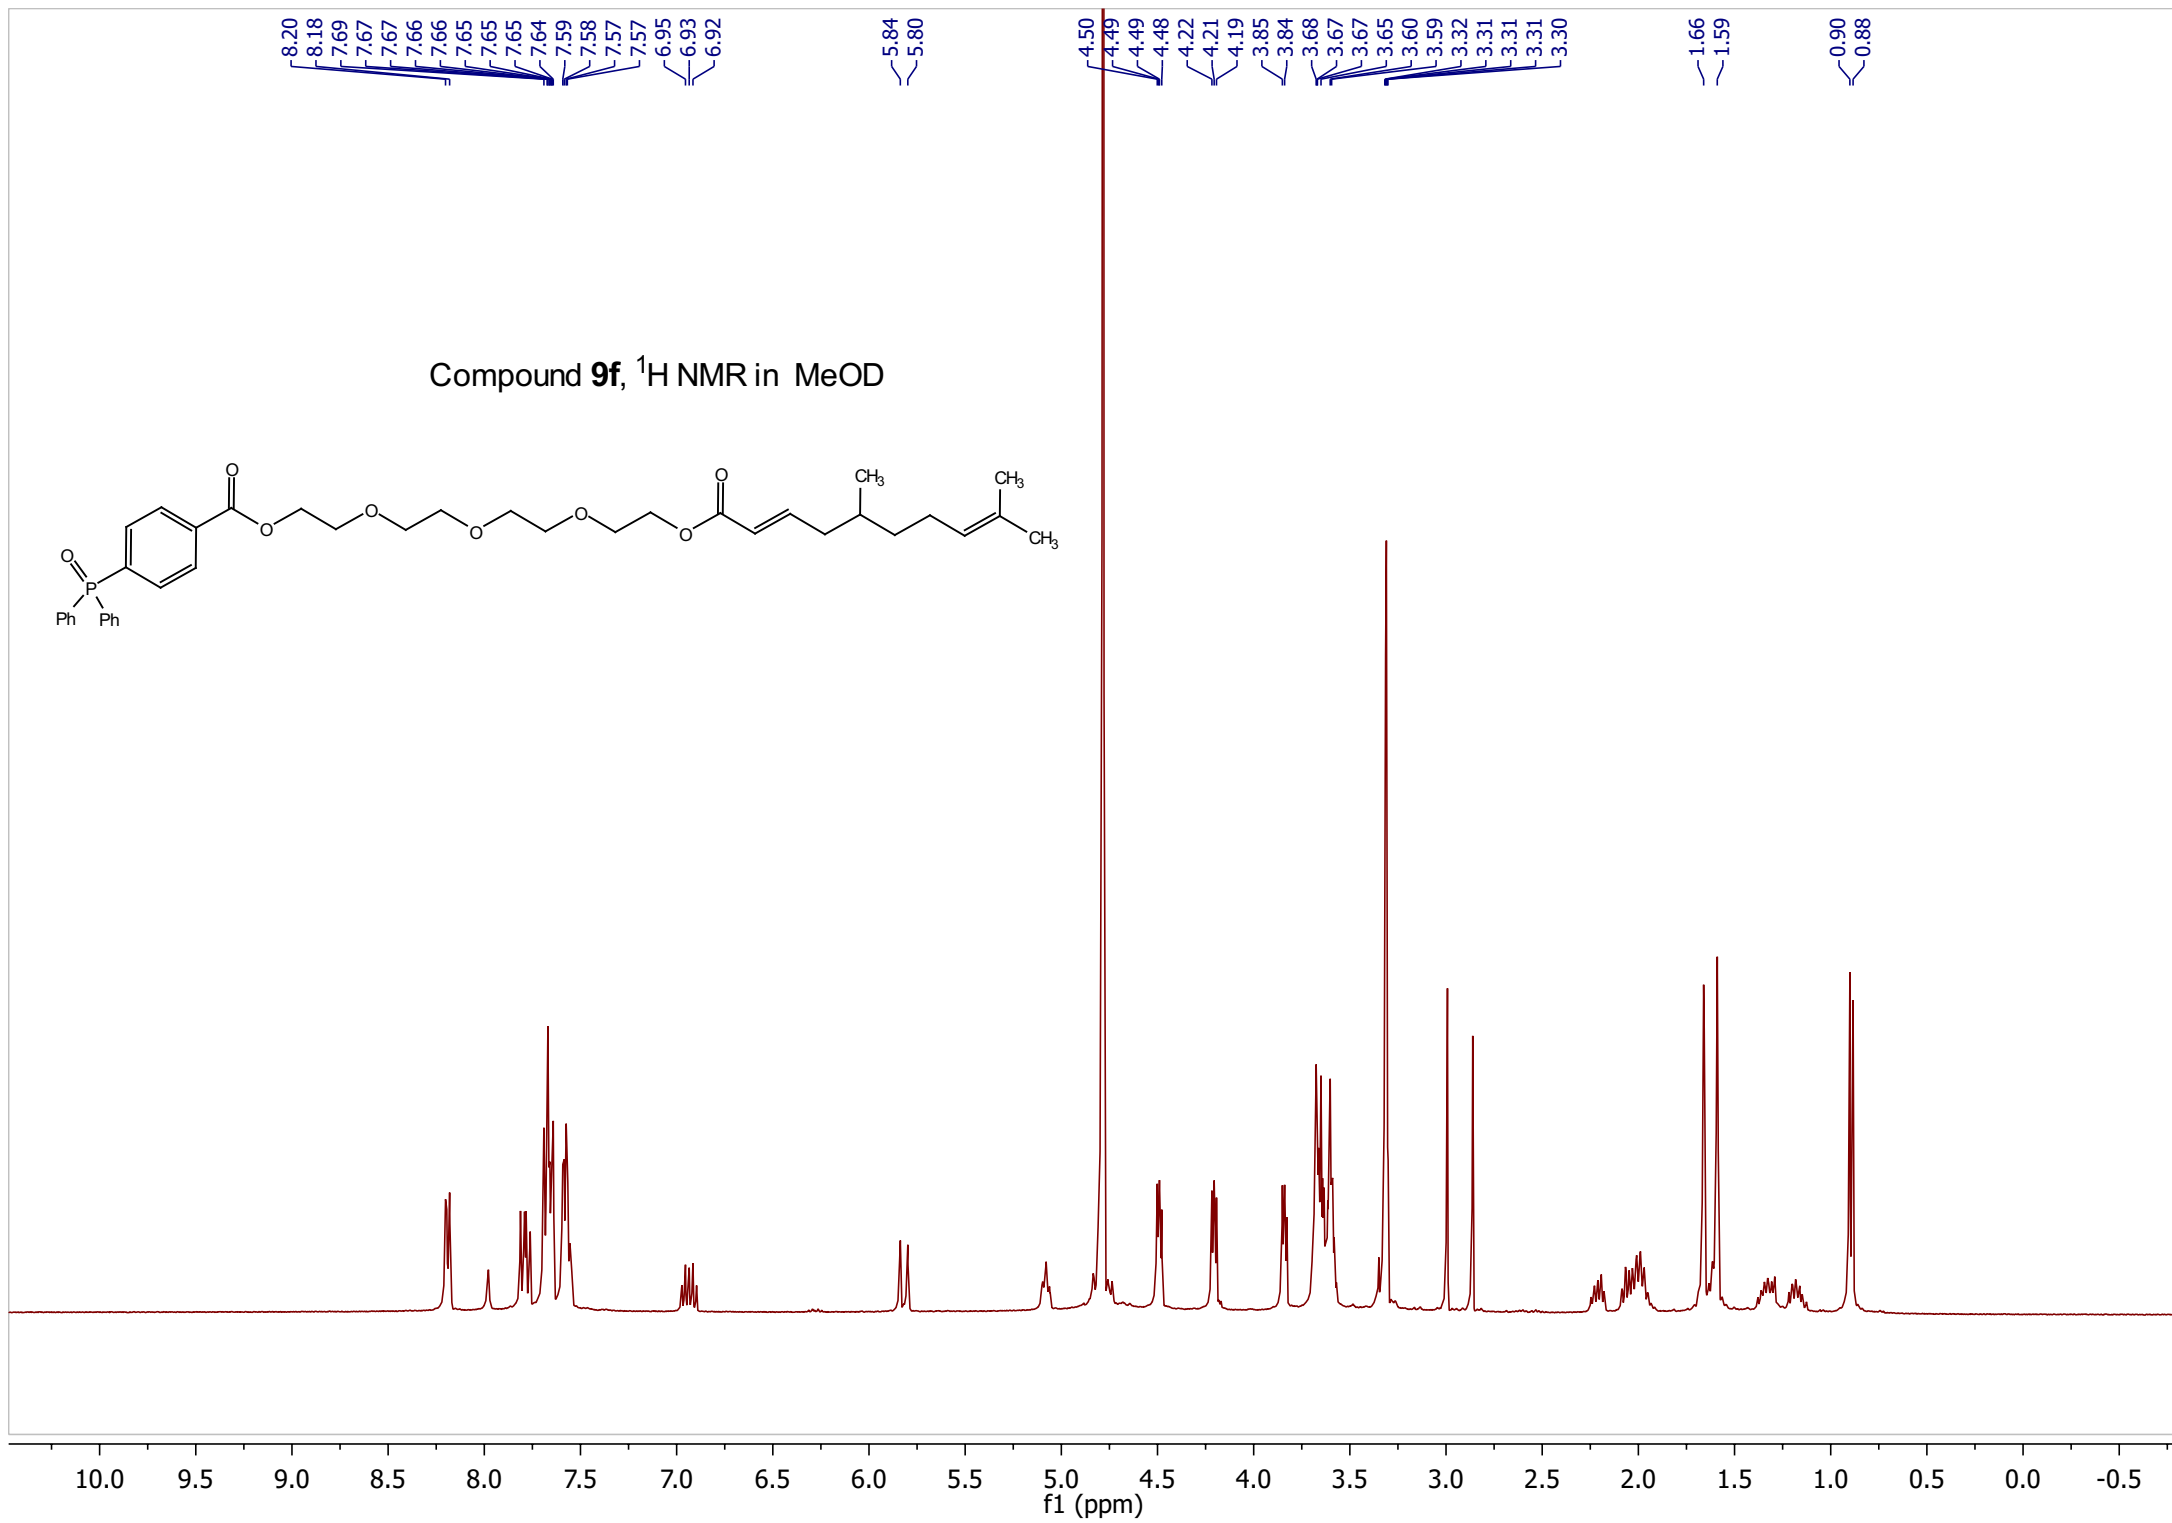

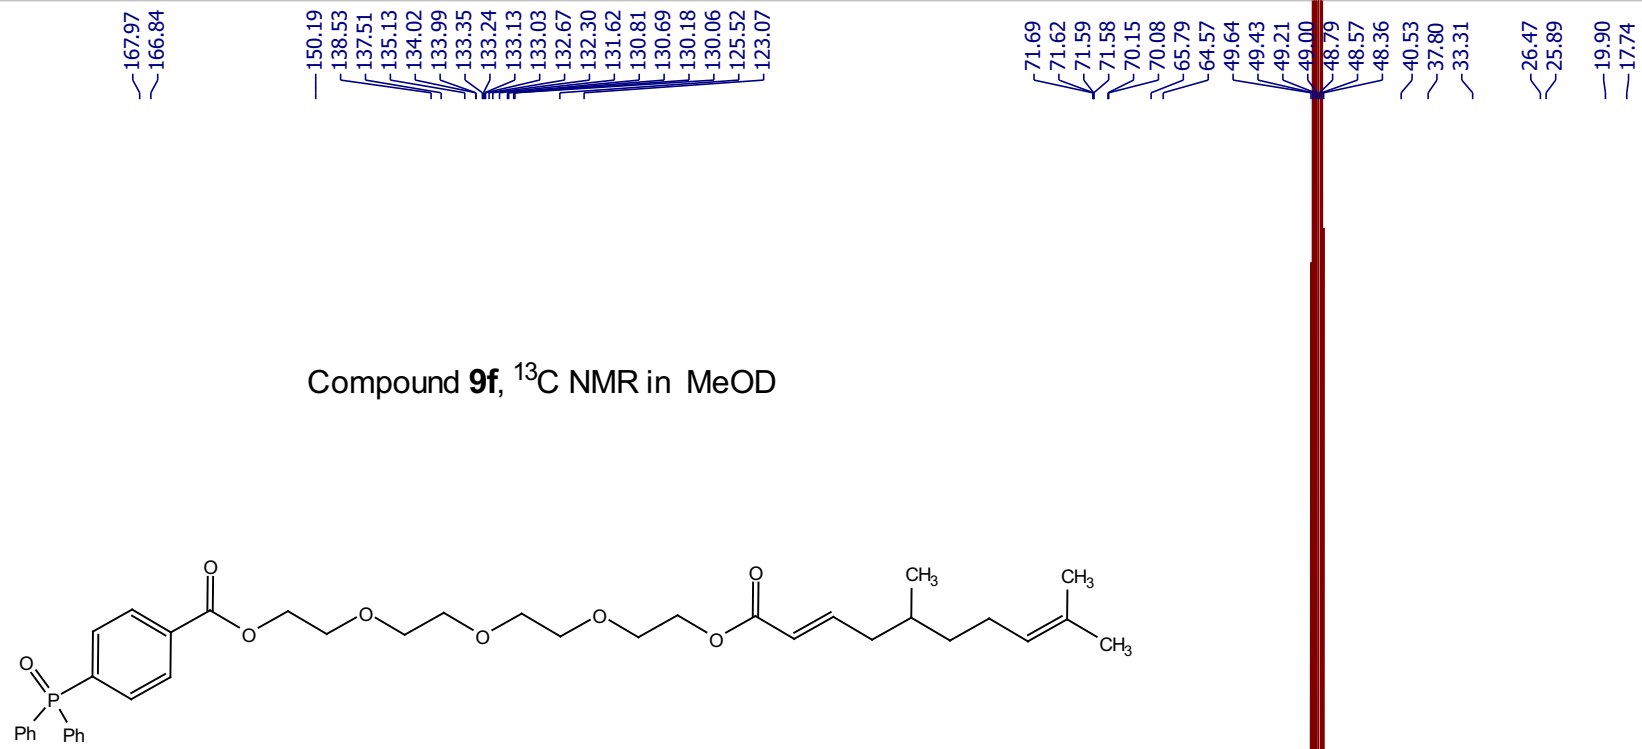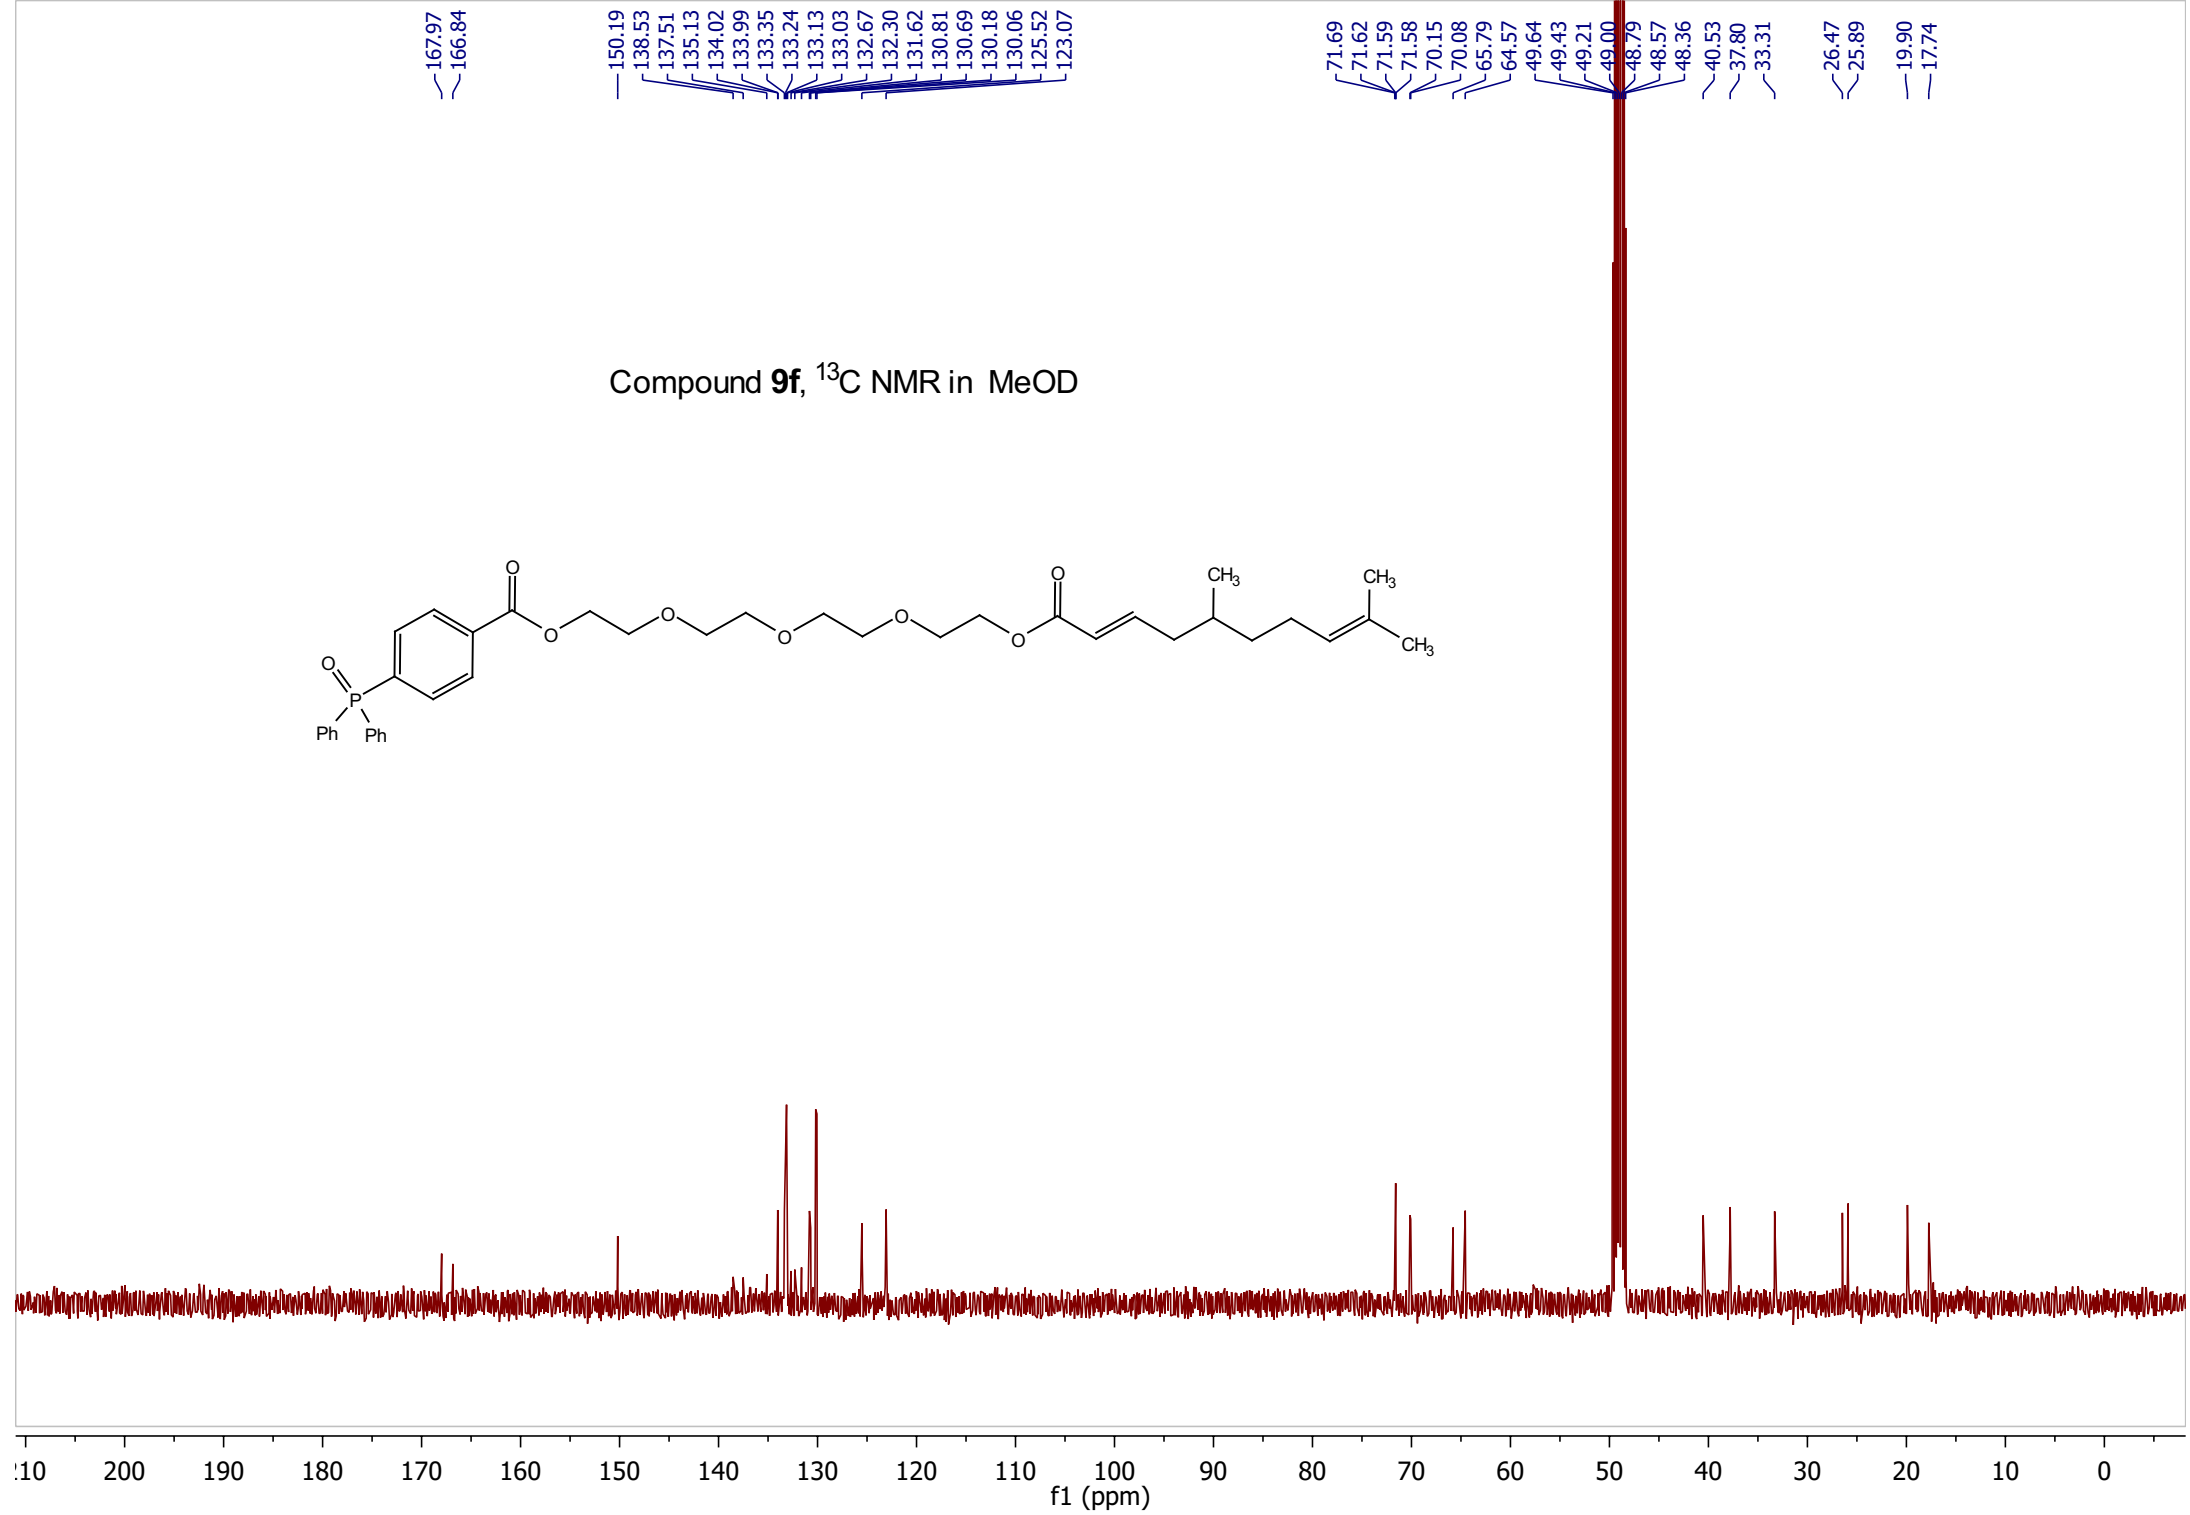

Compound **9f**,  $^{31}\text{P}$  NMR in  $\text{CDCl}_3$

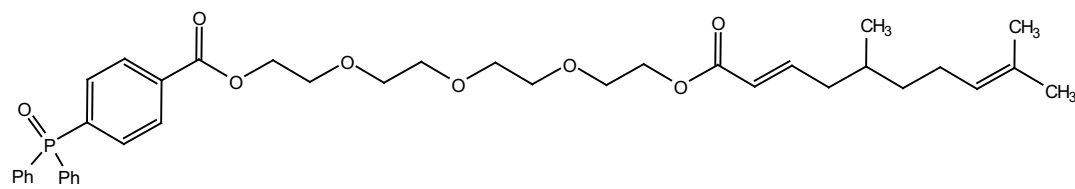

—28.31

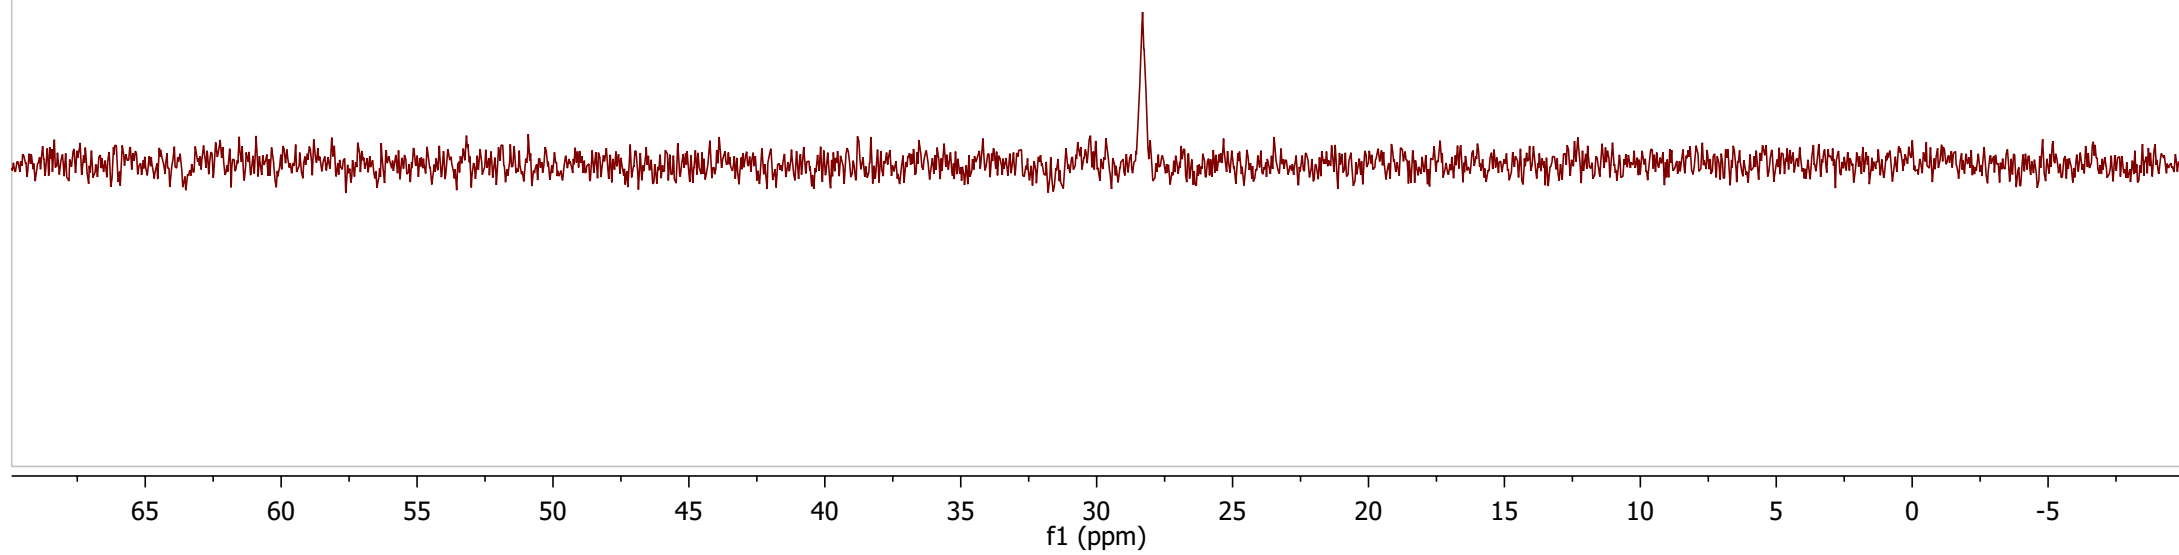

Compound **9g**,  $^1\text{H}$  NMR in MeOD

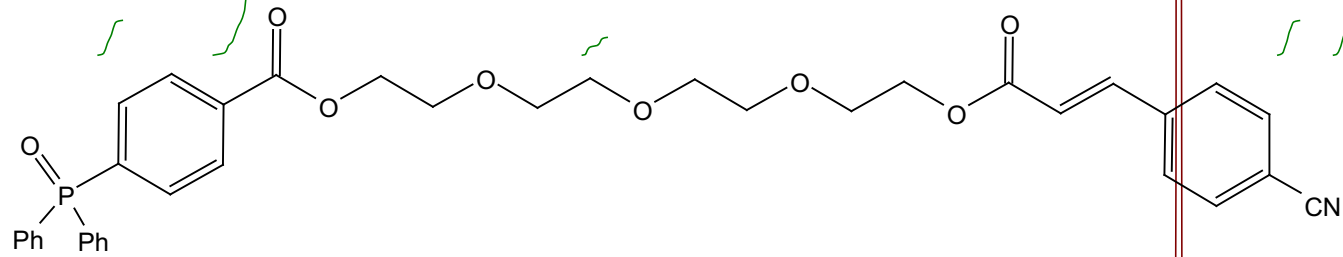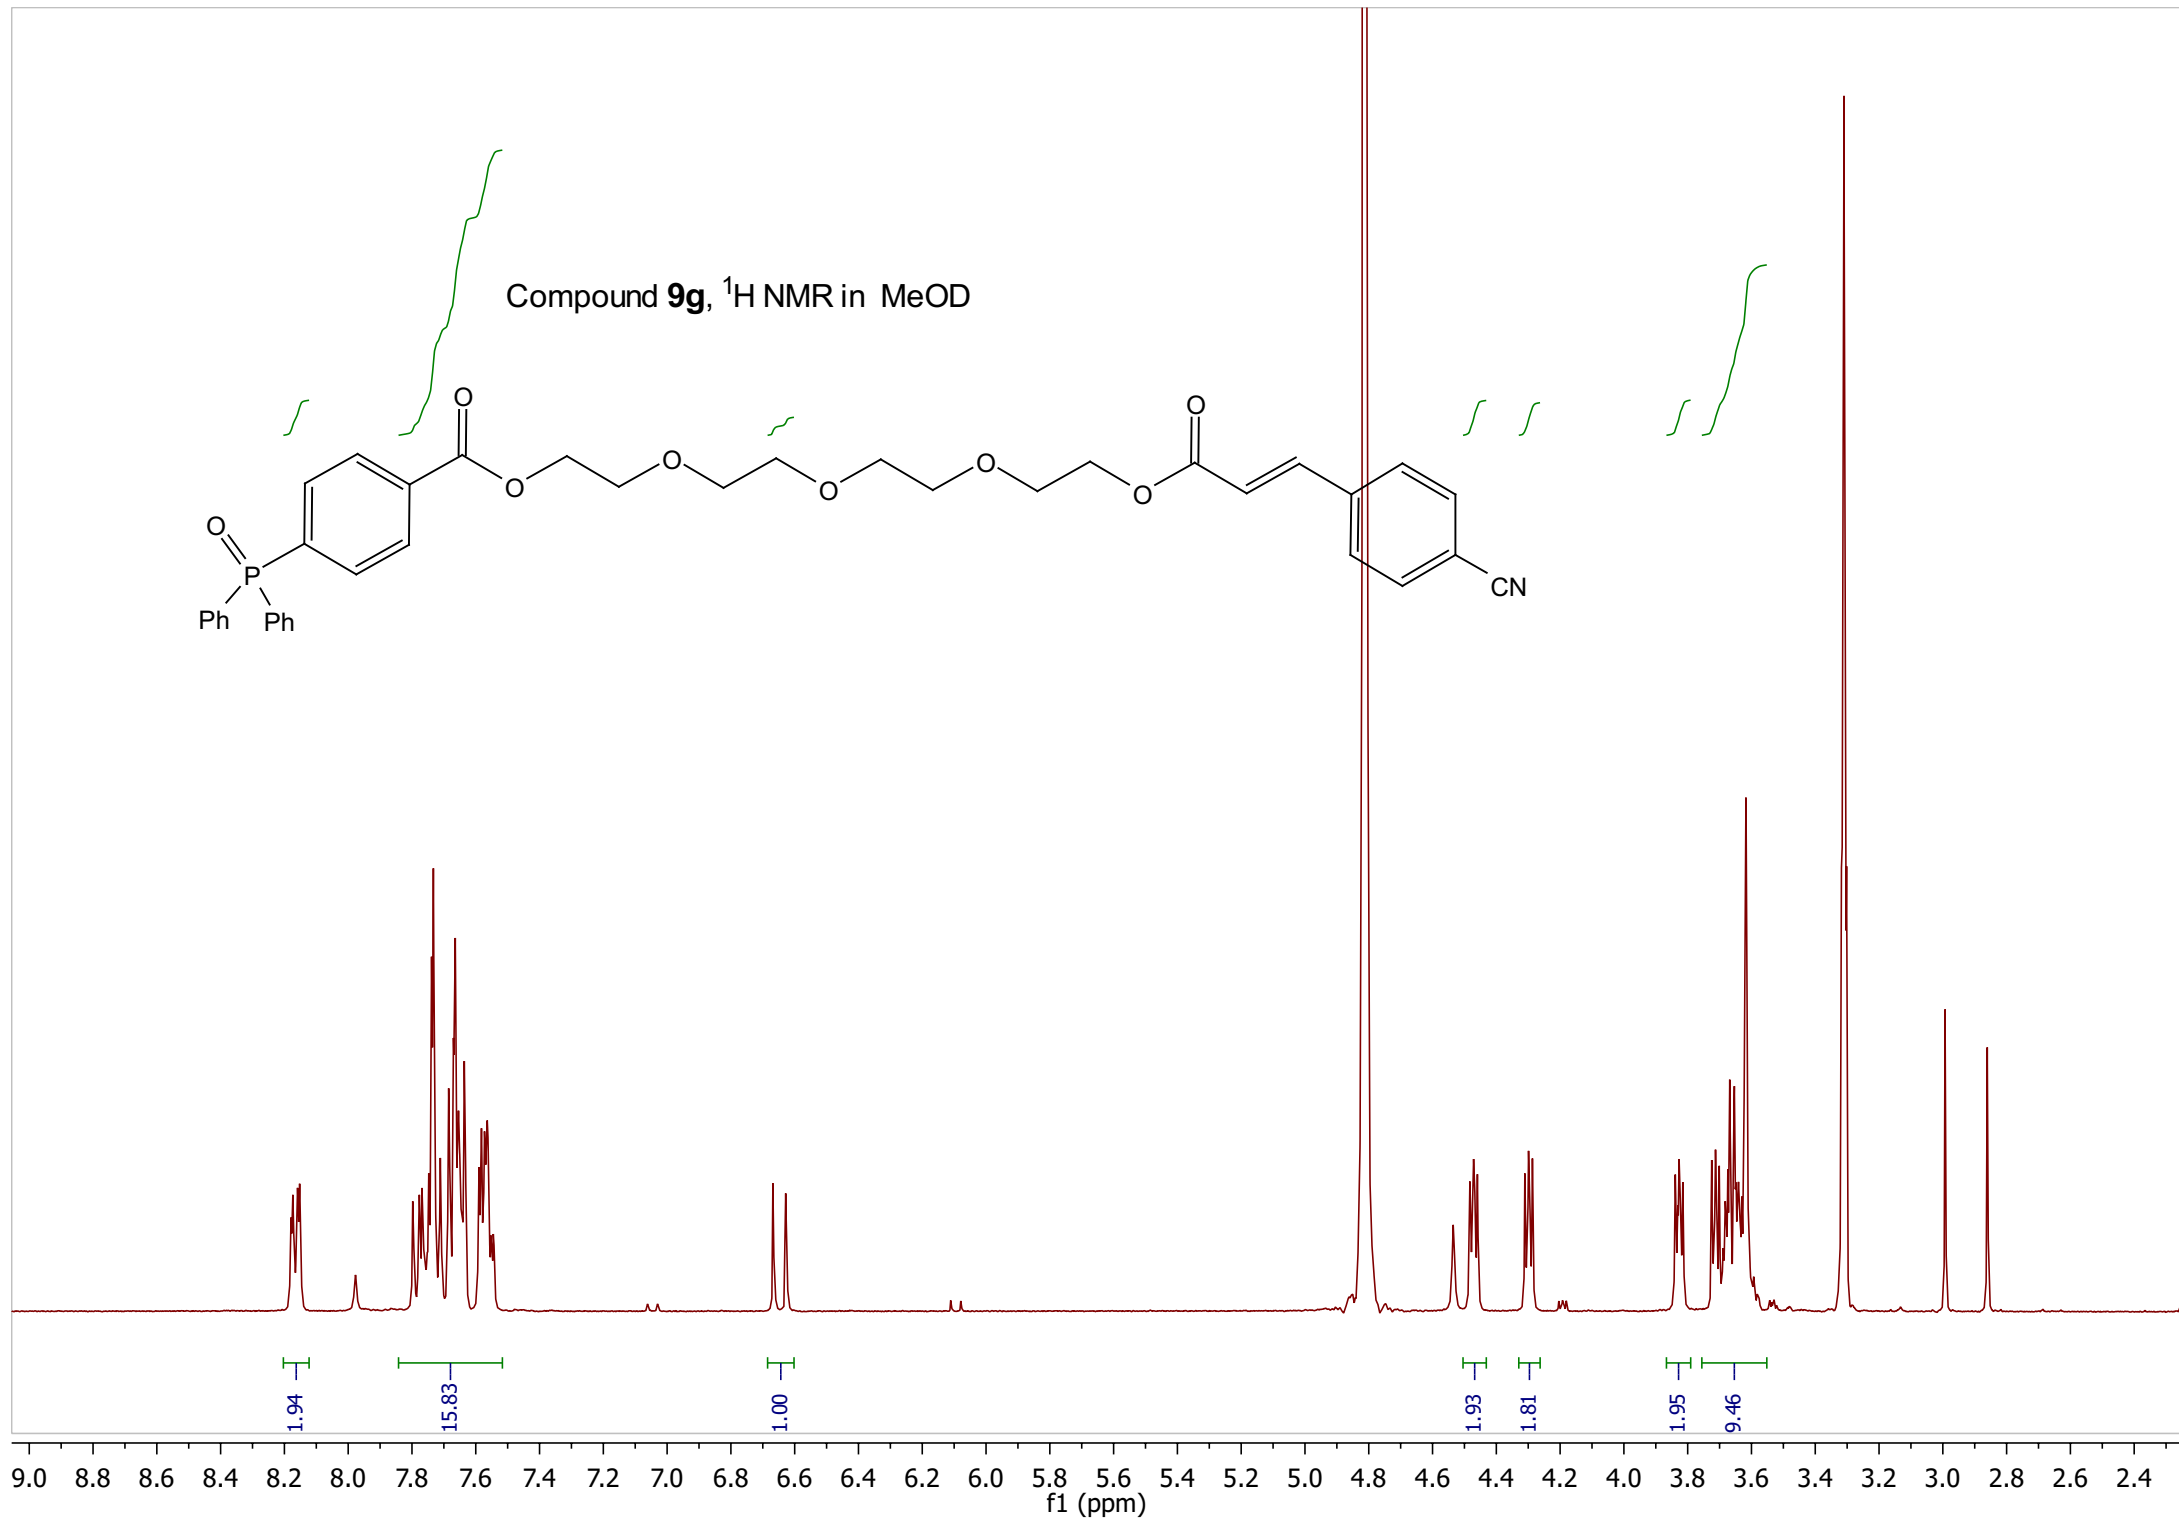

Compound **9g**,  $^{13}\text{C}$  NMR in MeOD

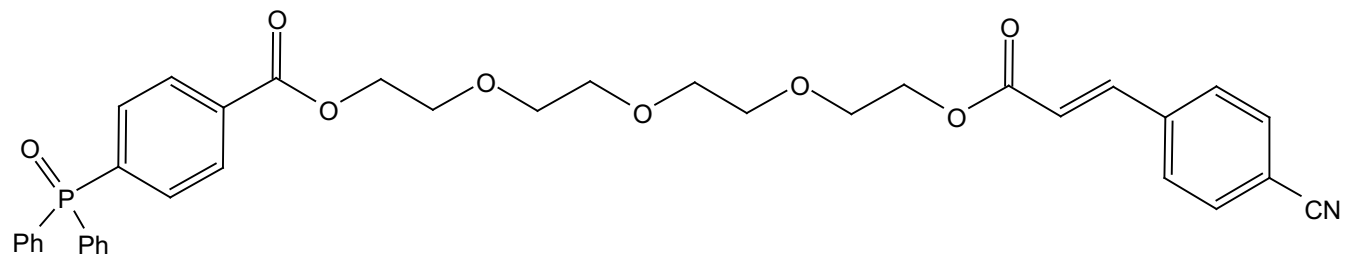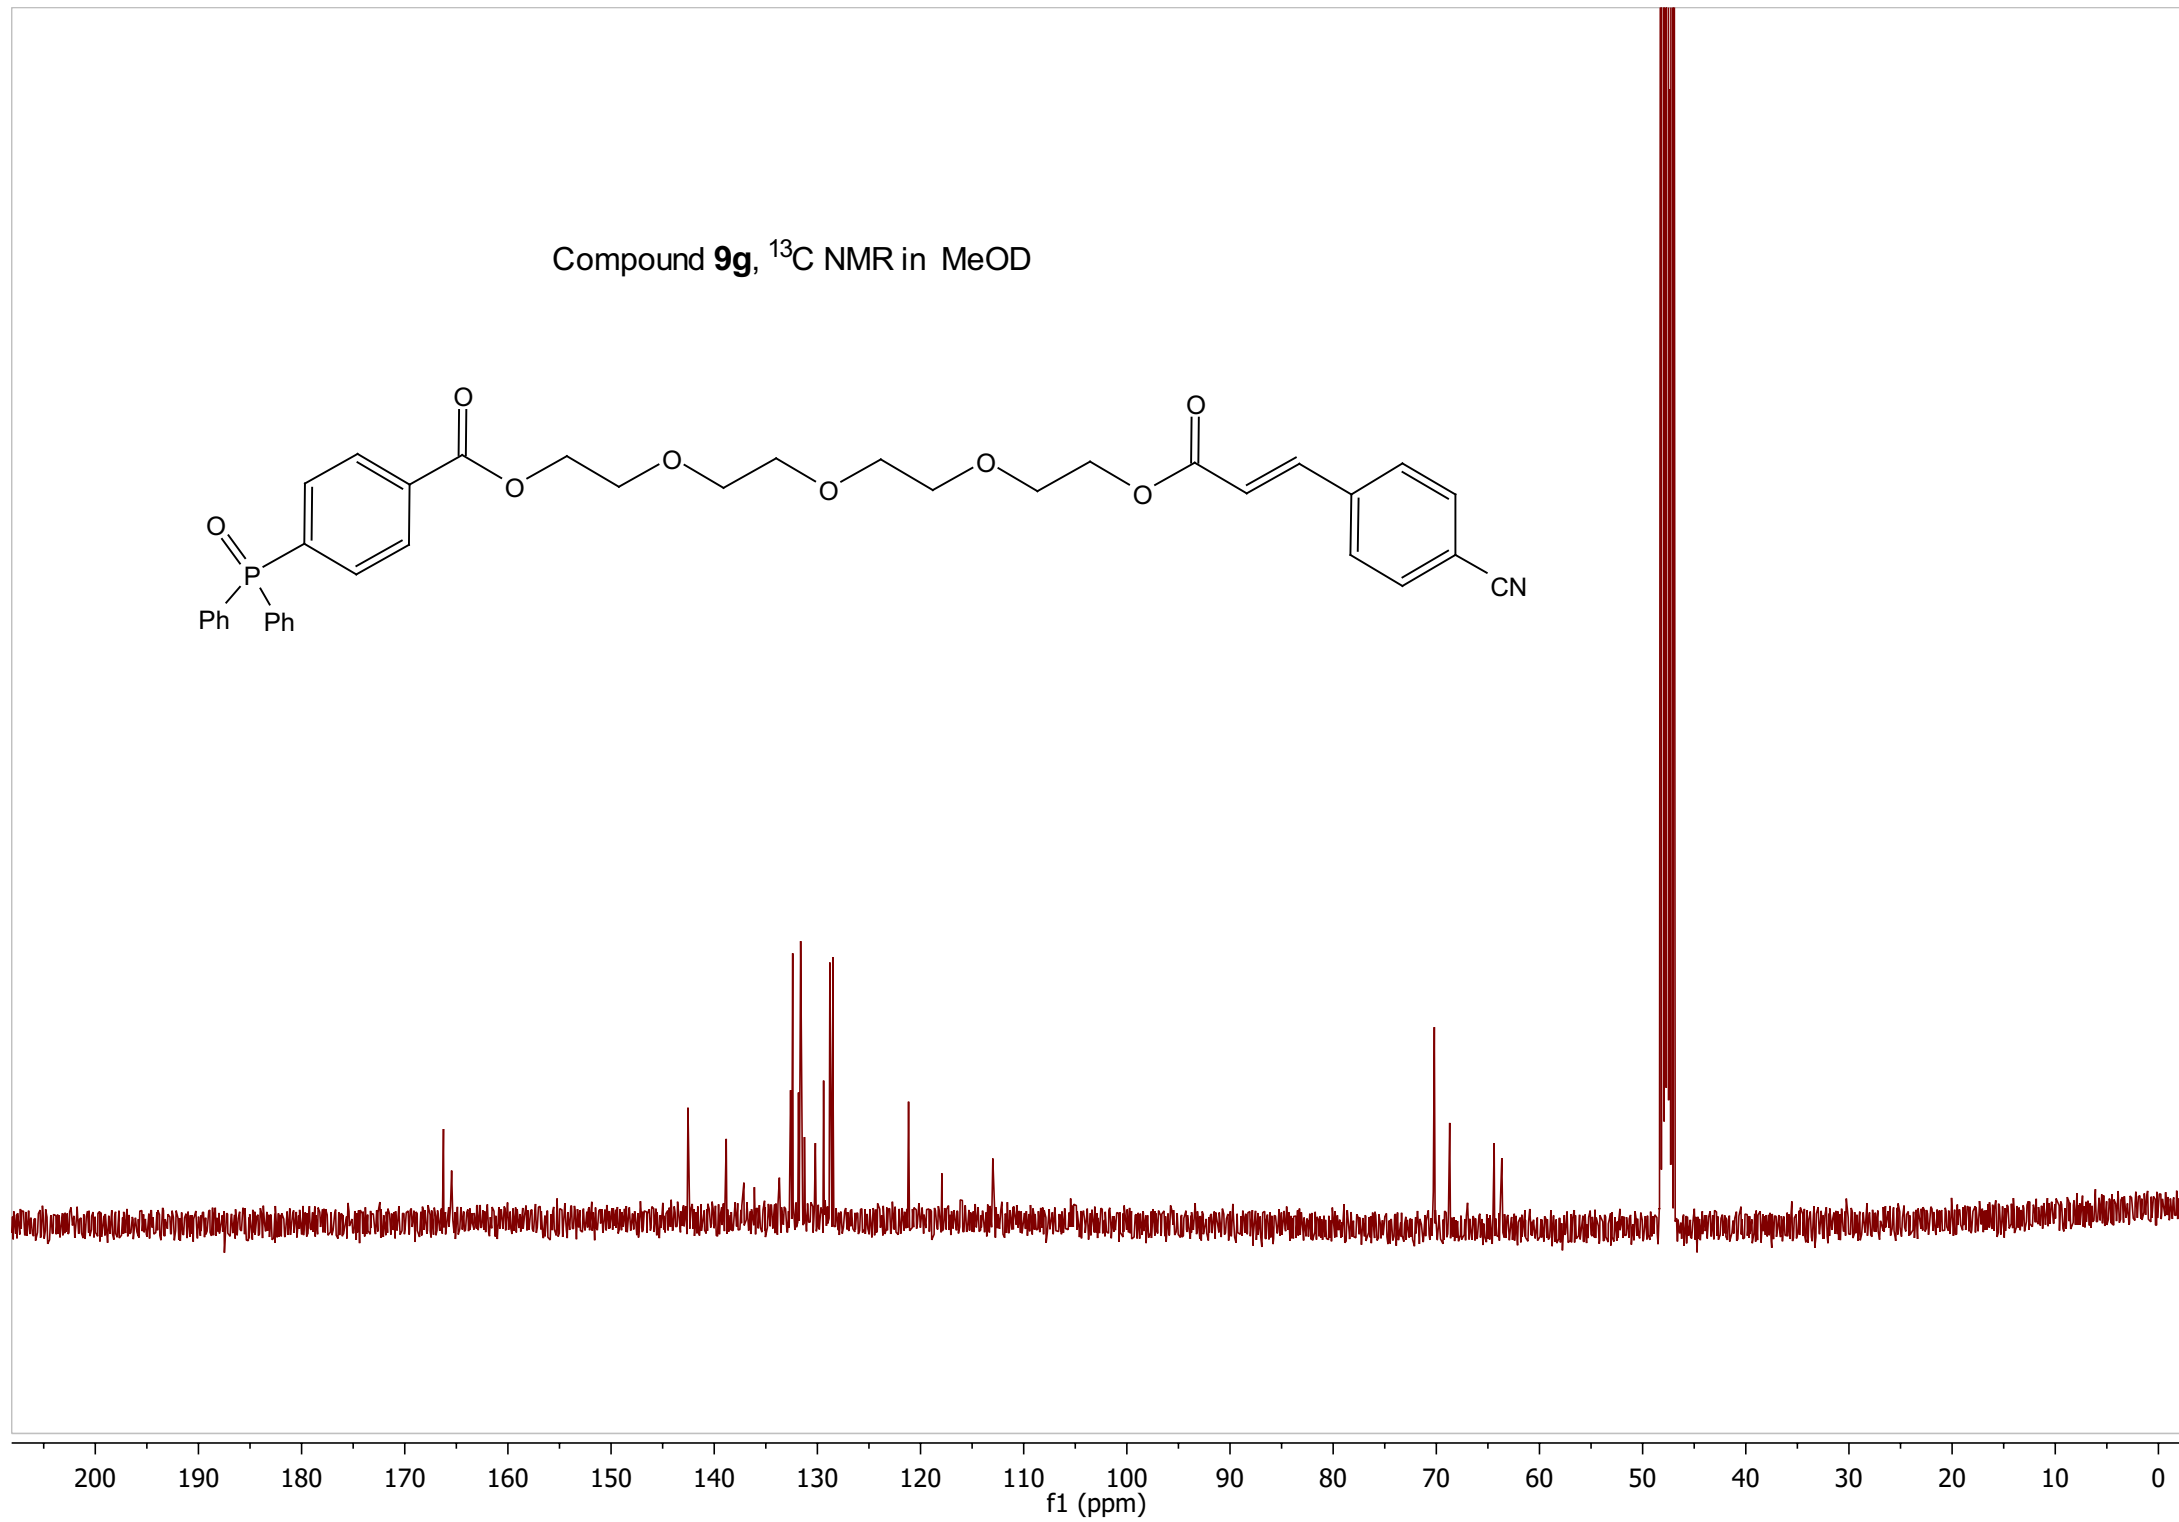

Compound **9g**,  $^{31}\text{P}$  NMR in MeOD

— 31.23

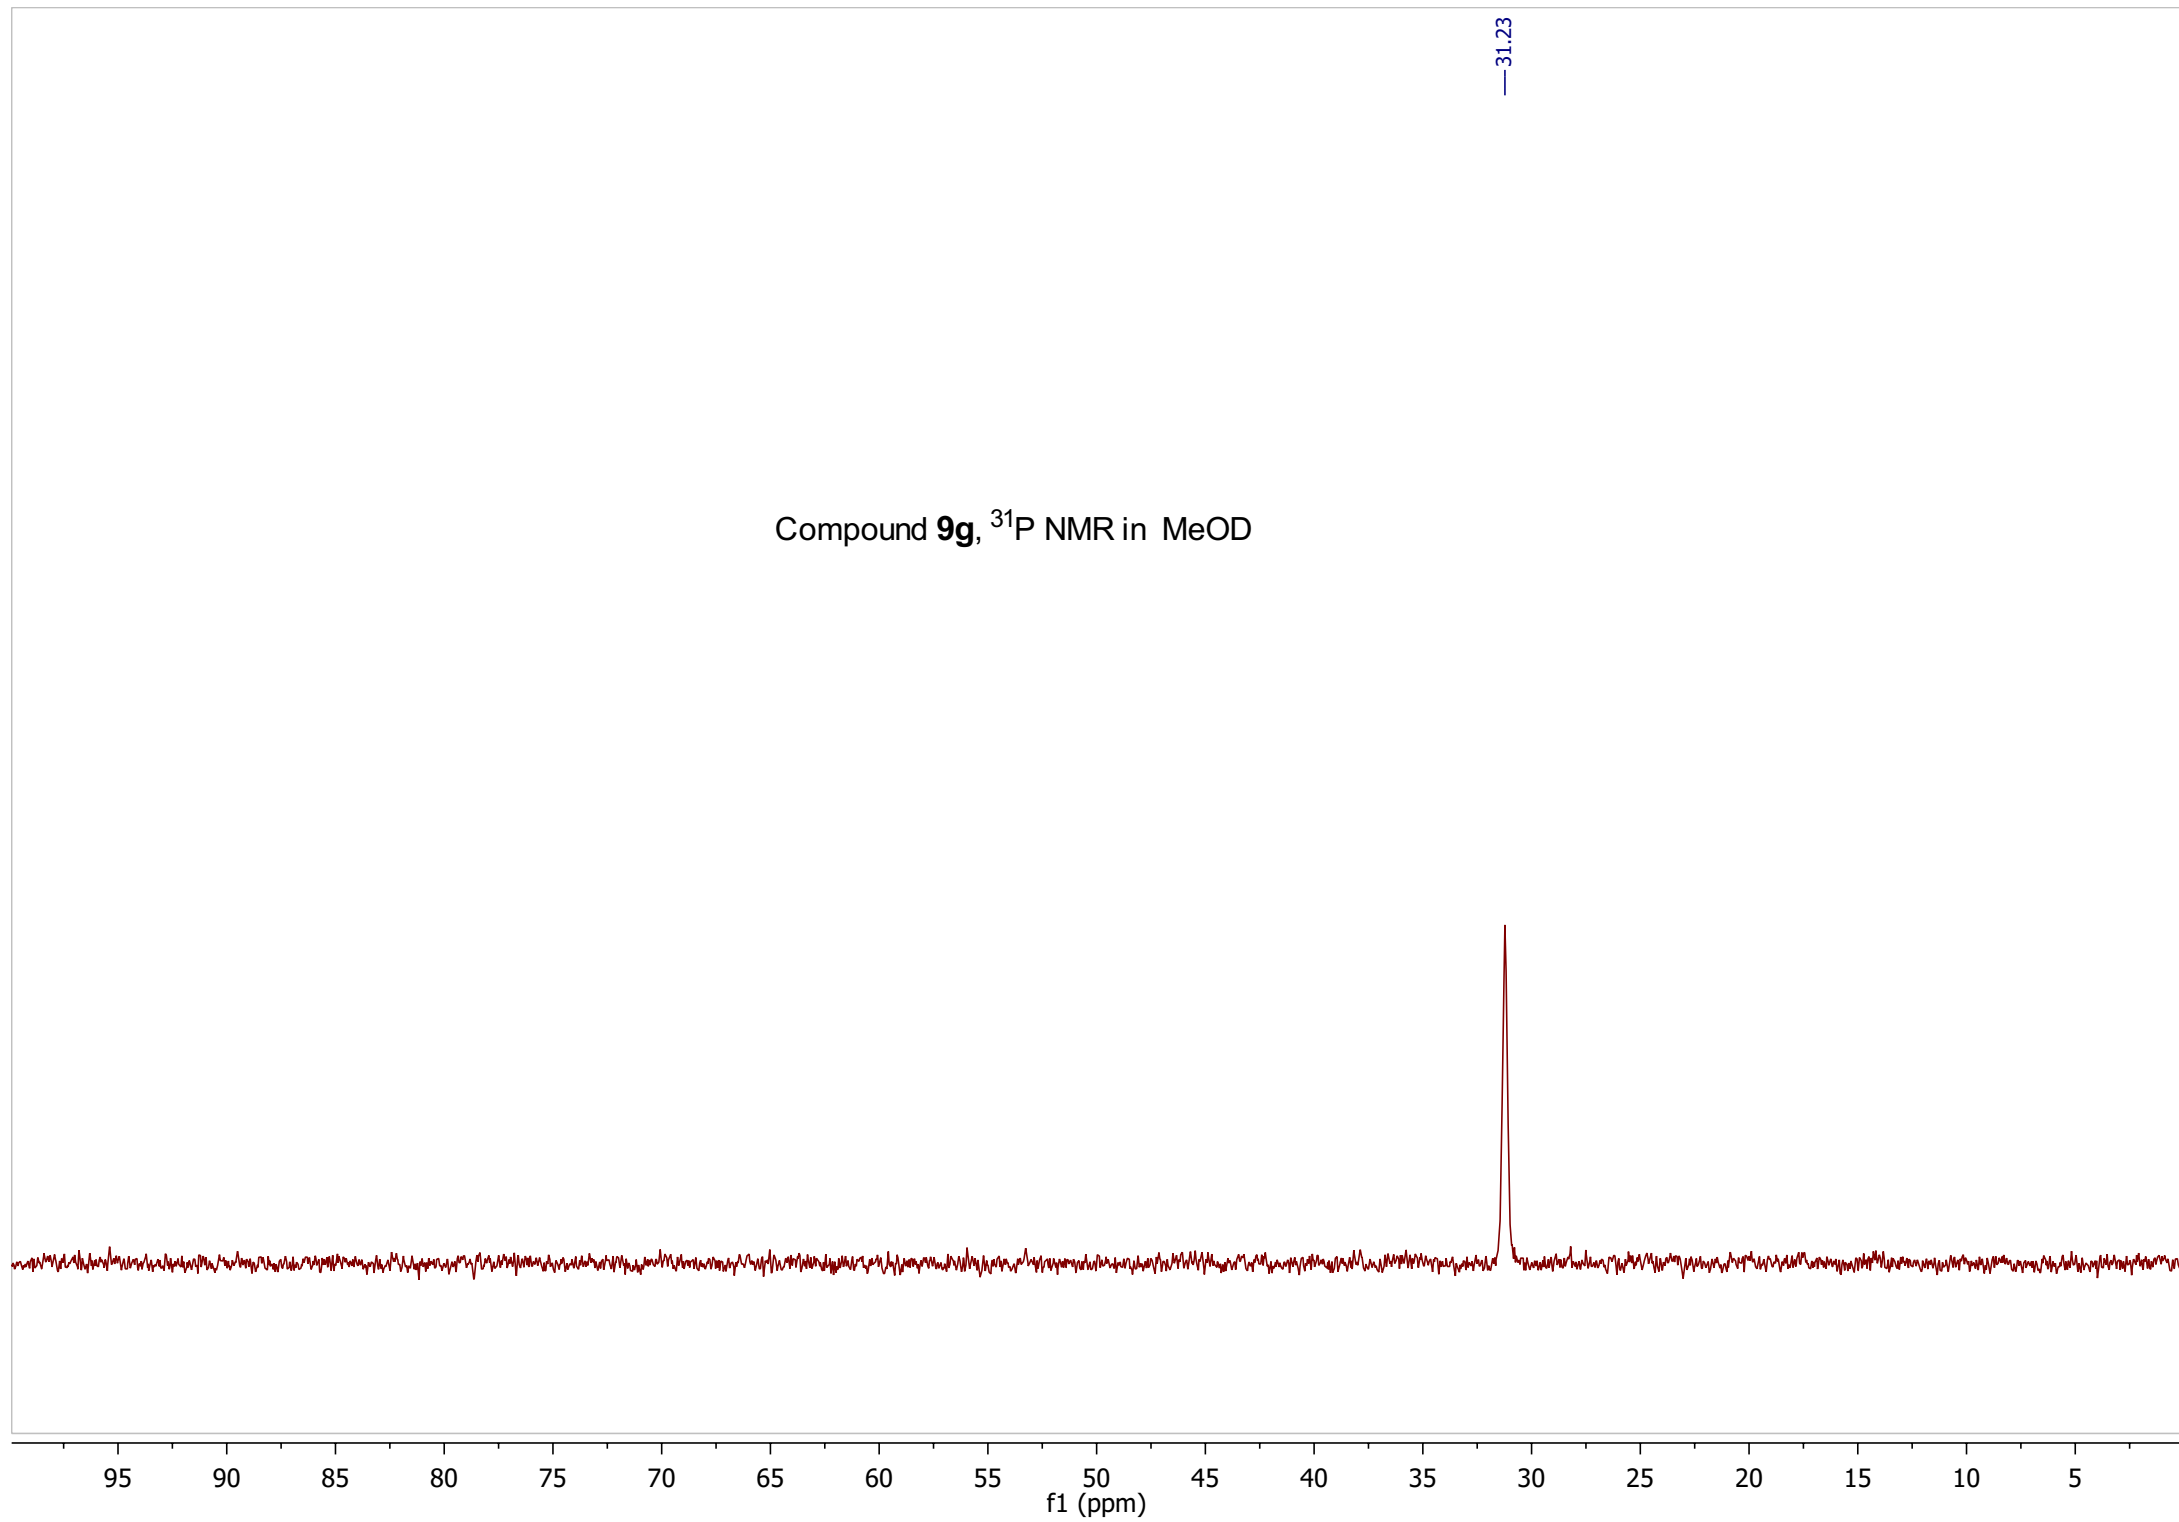

Compound **9h**,  $^1\text{H}$  NMR in MeOD

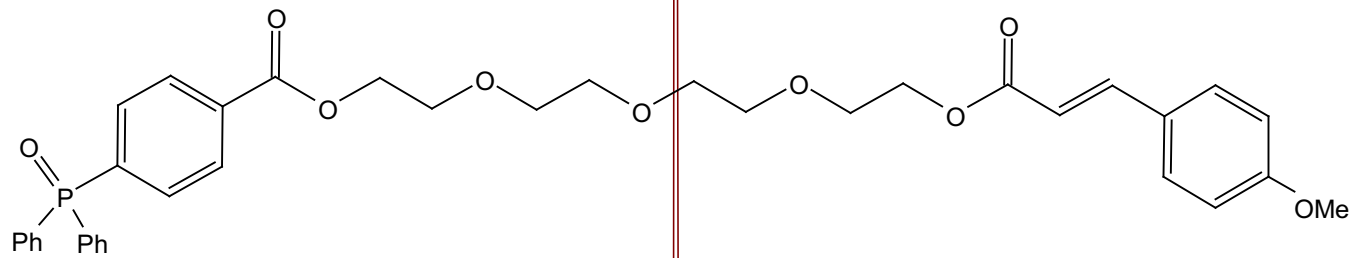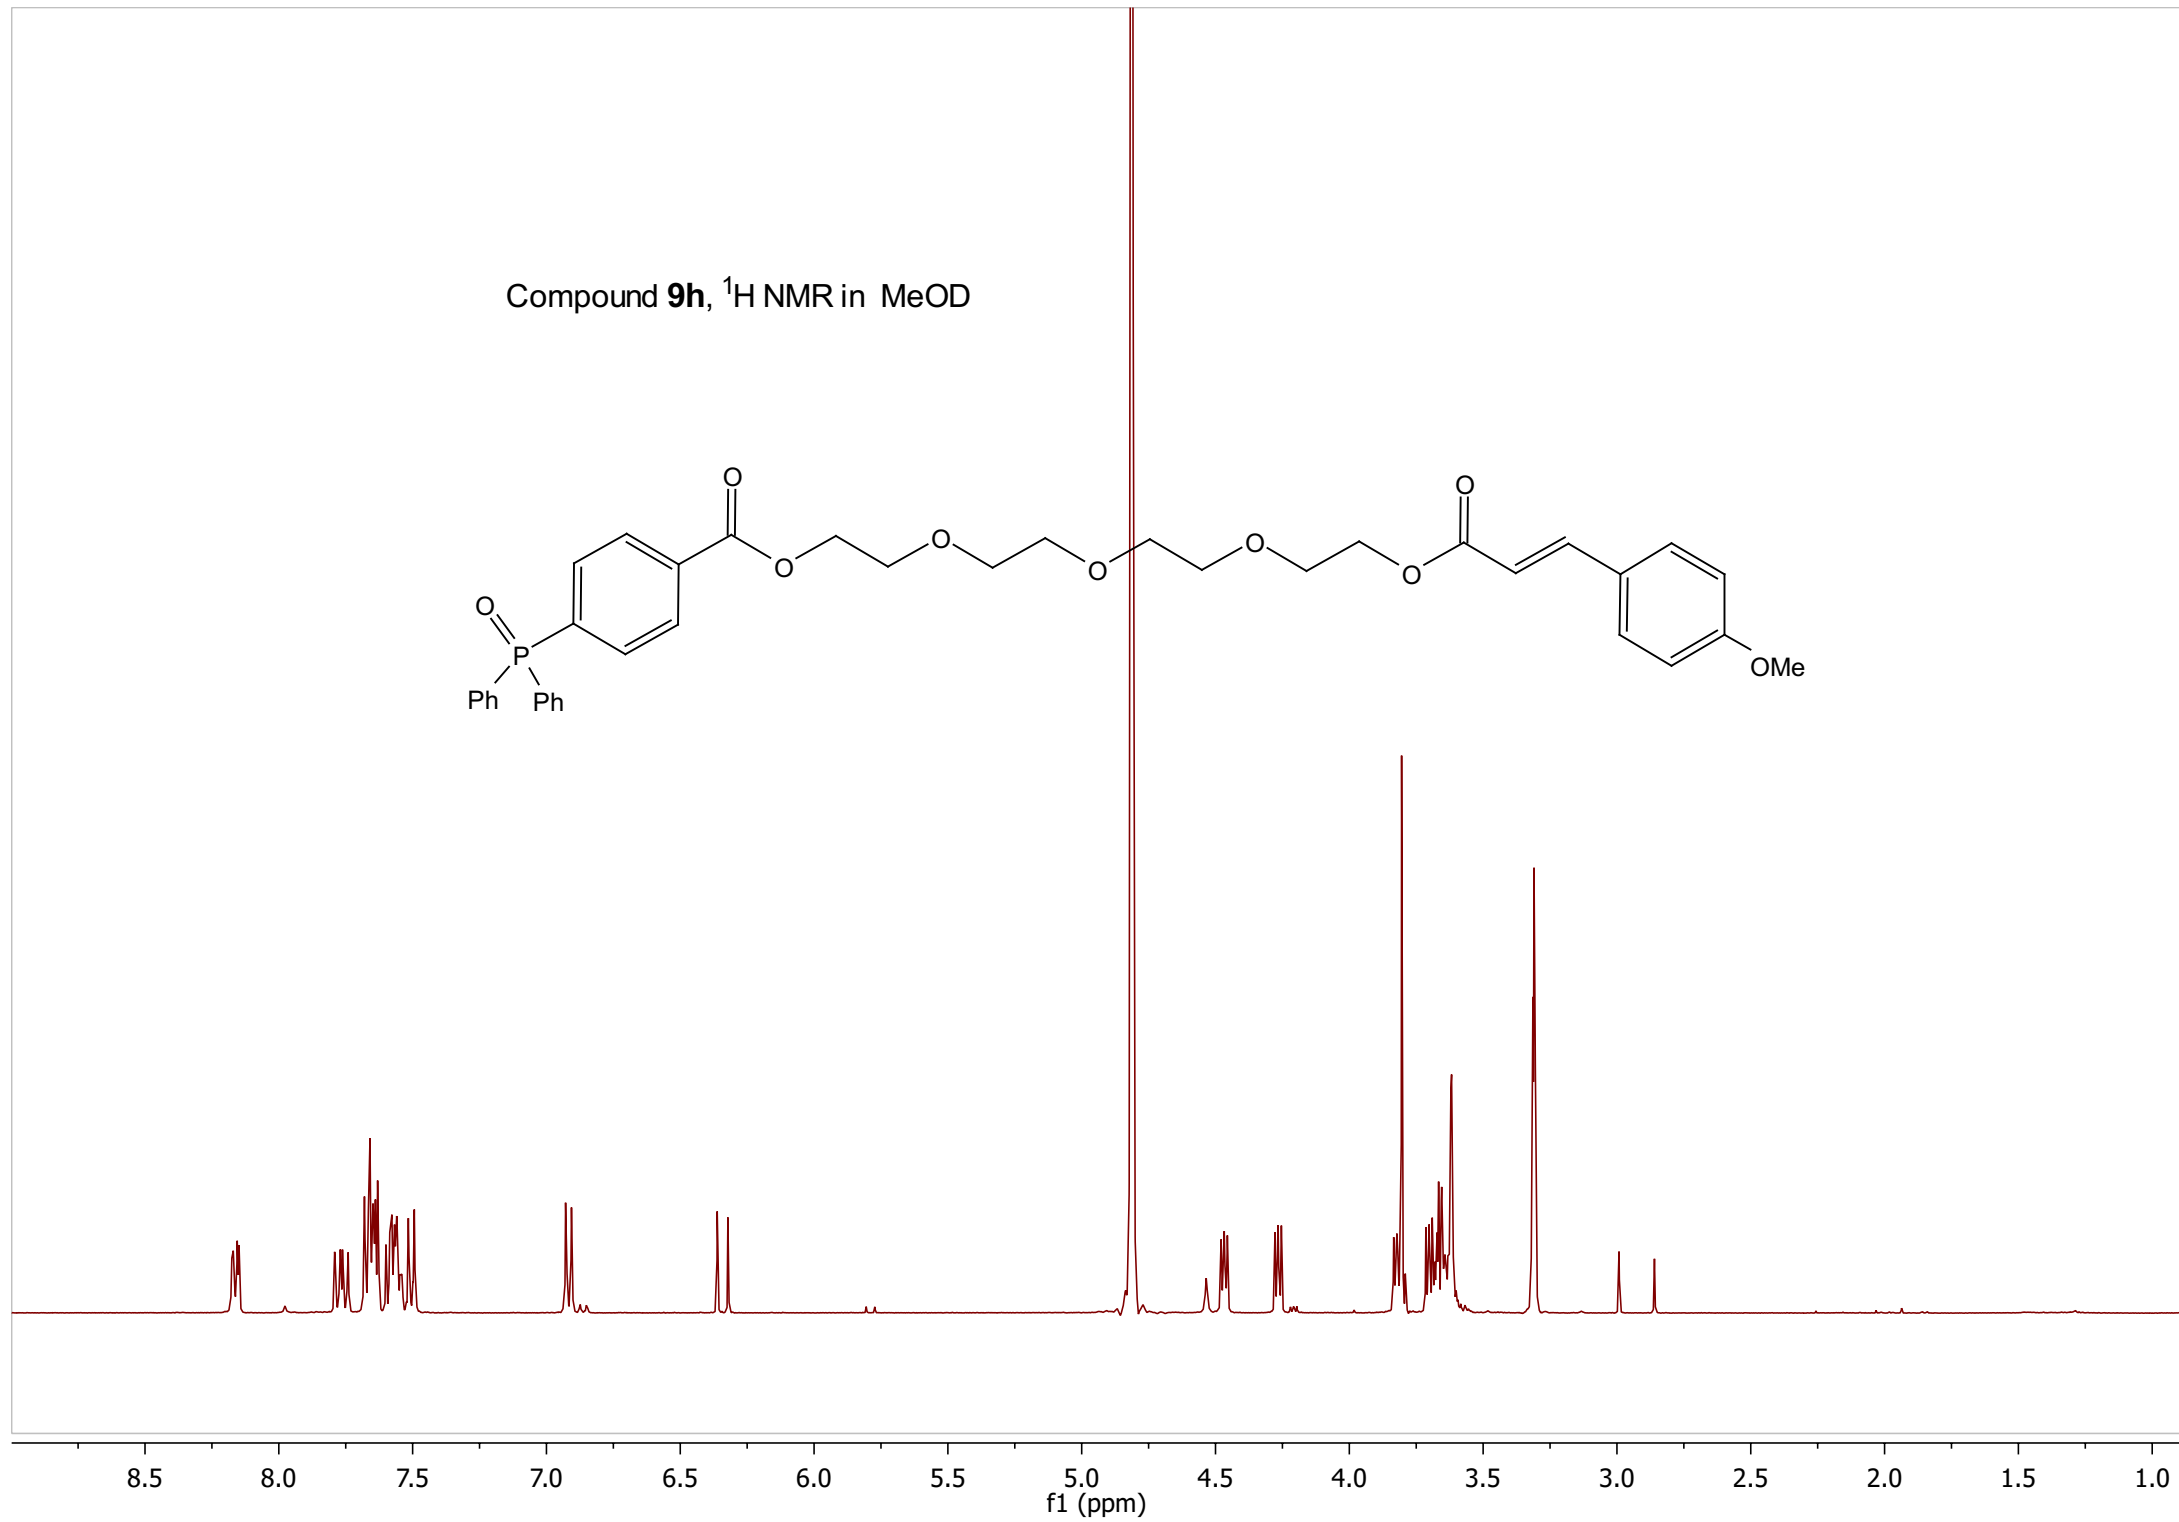

Compound **9h**,  $^{13}\text{C}$  NMR in MeOD

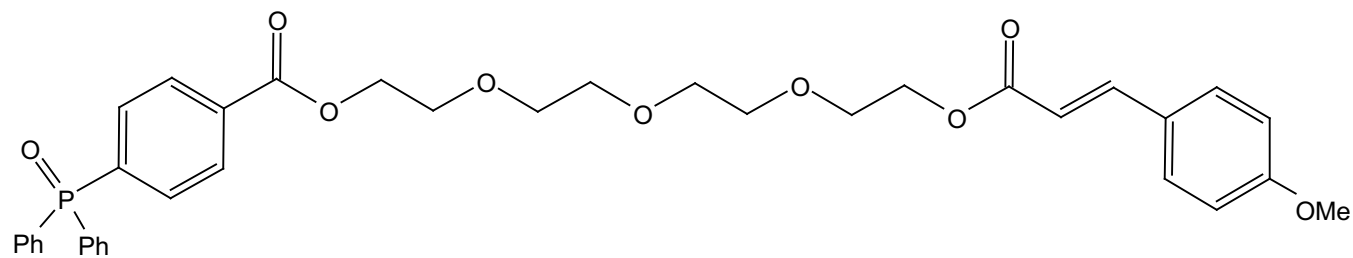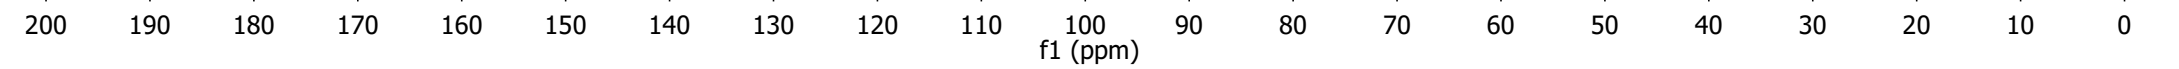



Compound **9h**,  $^{31}\text{P}$  NMR in MeOD

—31.27

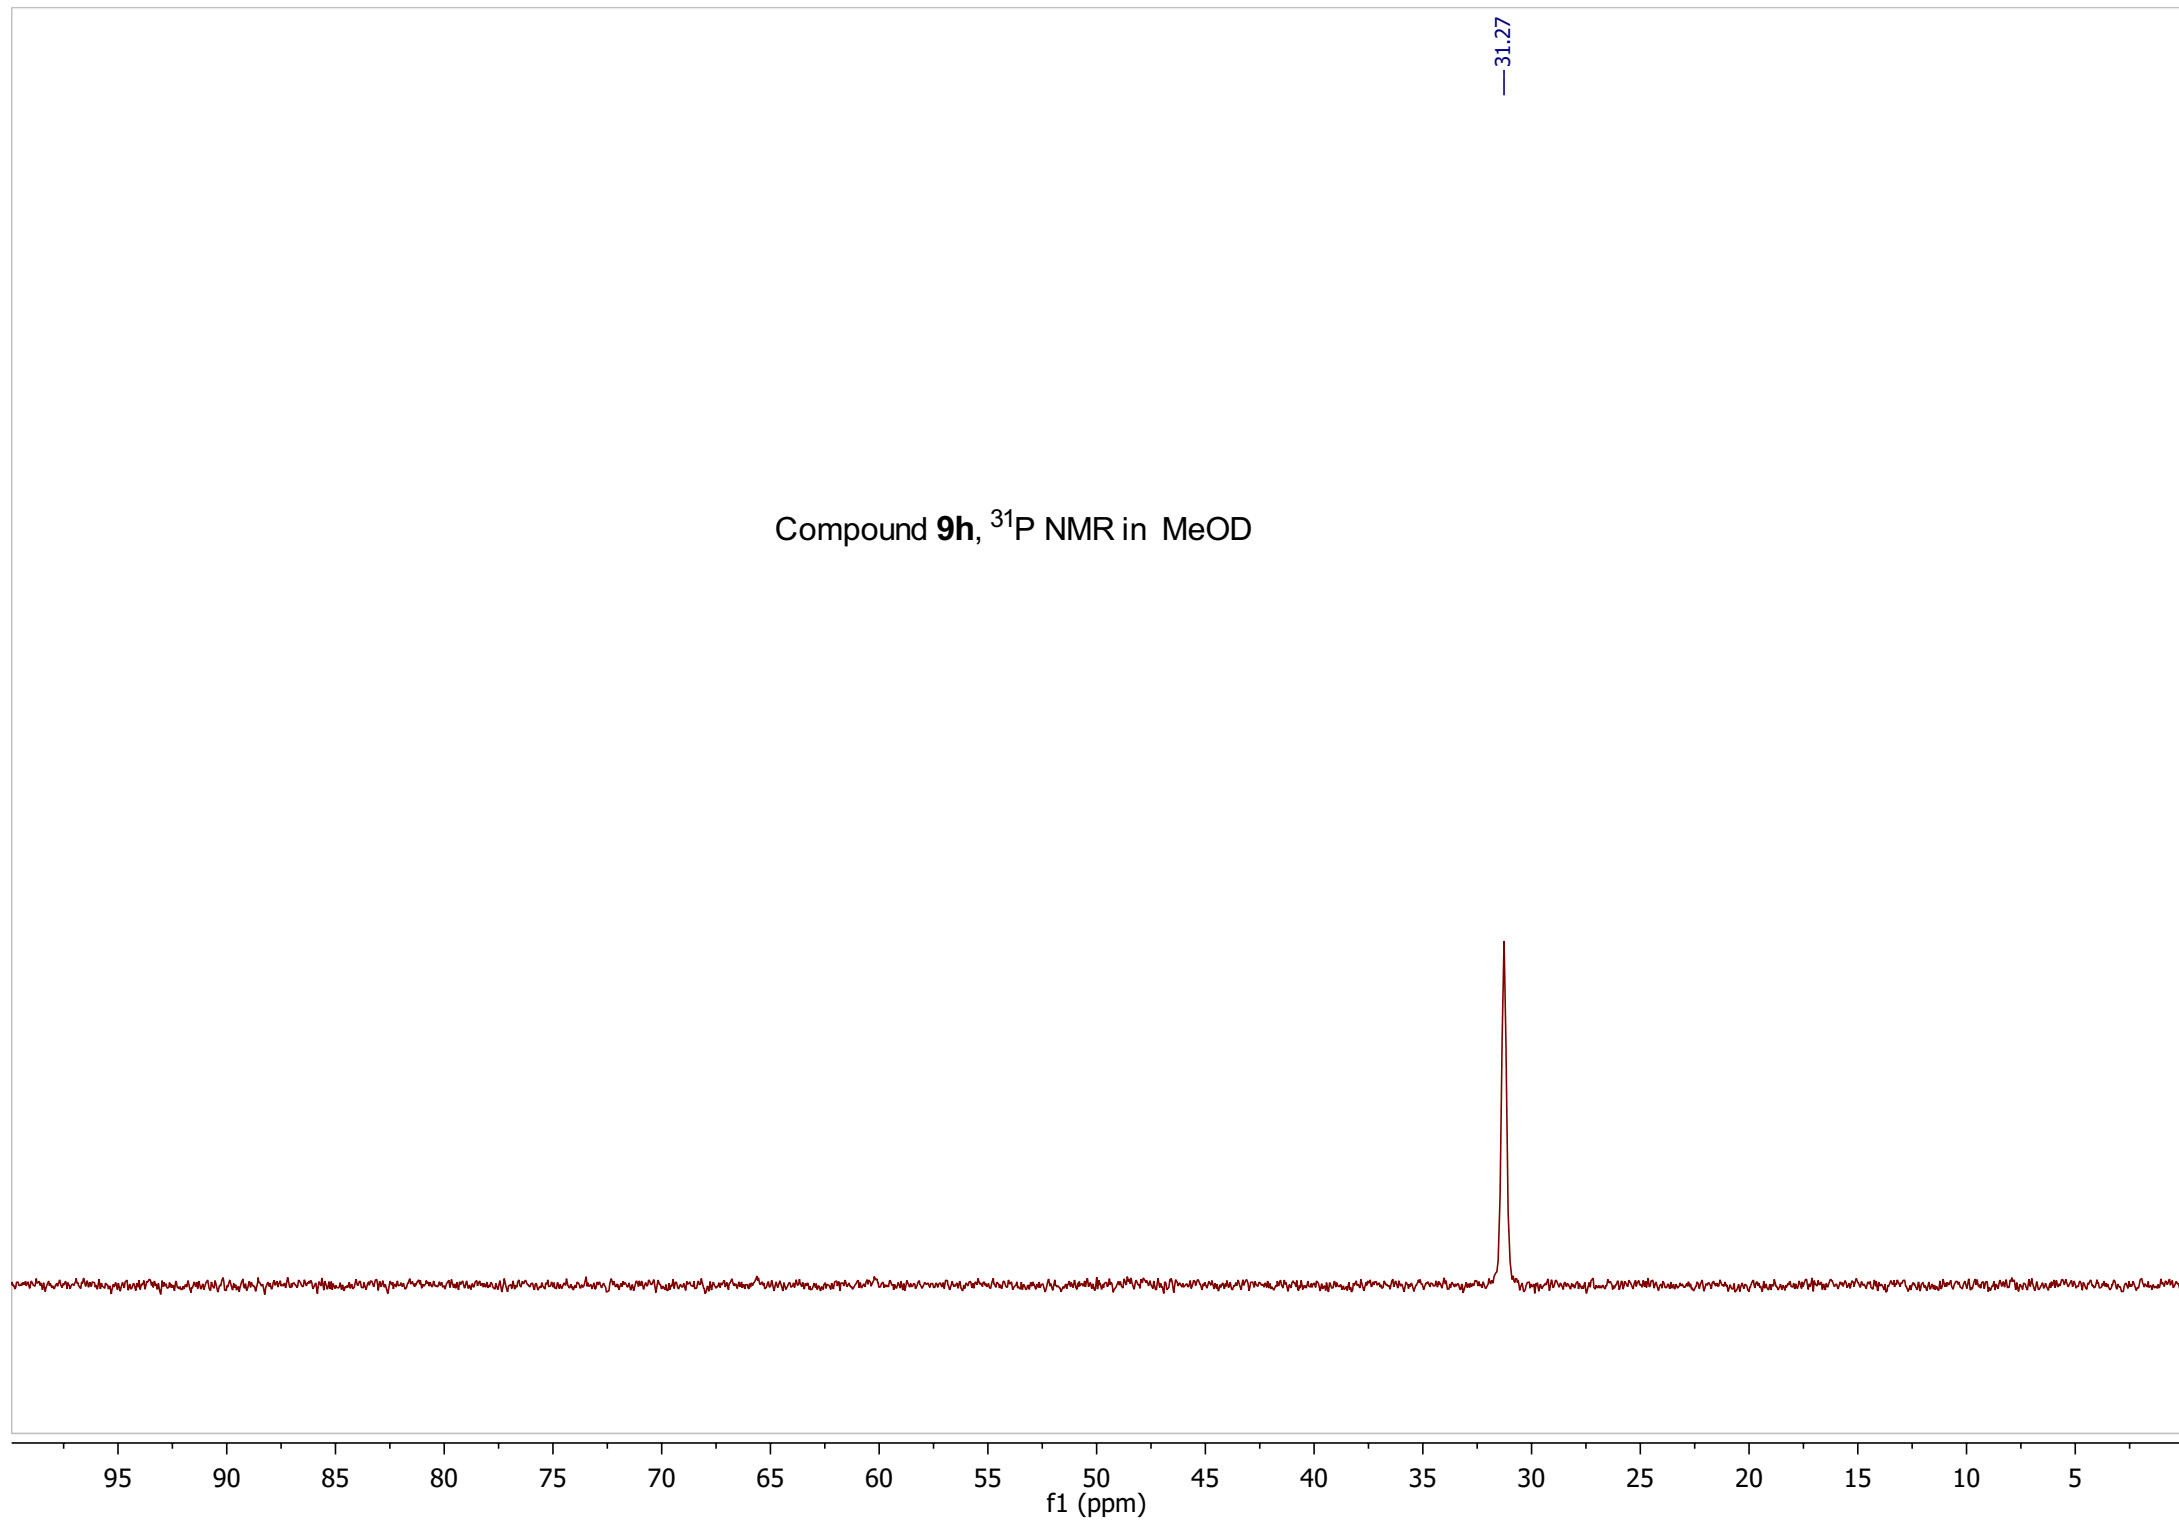

Supplement: c8ra03324b1.pdf [file c8ra03324b1.pdf]
